# Supplementary material for: Primary amine-metal Lewis acid bifunctional catalysts: the application to asymmetric direct aldol reactions
Source: Royal Society of Chemistry journal article supplement (doi:10.1039/b912728c), 2009-01-01
Supplement: b912728c.pdf [file b912728c.pdf]

## **Primary amine-metal Lewis acid bifunctional catalysts: the application to asymmetric direct aldol reaction**

Zhenghu Xu, Philius Daka, Hong Wang<sup>\*</sup>  
Miami University, Department of Chemistry and biochemistry, Oxford, OH 45056

|                                                          |       |
|----------------------------------------------------------|-------|
| General                                                  | 2     |
| Synthesis of the ligands                                 | 2-6   |
| General procedure of the enantioselective aldol reaction | 7-15  |
| NMR spectra for the aldol adducts and ligands            | 16-55 |
| HPLC spectra for the aldol products                      | 56-85 |
| References                                               | 86    |

**General:** All NMR spectra were recorded on Bruker-500 or 300 MHz spectrometer.

Optical rotation was measured on Rudolph Research Autopol III. Ee values were measured on chiral HPLC analysis using Gold Nouveau Chromatography system and the data was recorded on Shimadzu C-R6A Chromatopac integrator. Chiral AD-H and As-H column were purchased from Daicel Chemical Industries. Routine monitoring of the reaction was performed by TLC using precoated silica gel plates. Cyclohexanone was ACS reagent pure. THF was dried on Innovative Technology solvent purification system. All the other reagents were purchased from Acros or Aldrich and used directly.

### Synthesis of the ligands

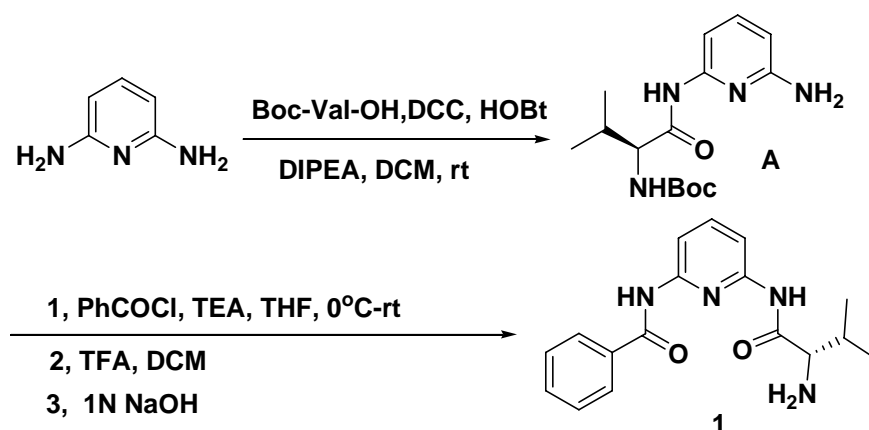

To a stirred solution of N-Boc-L-valine (2.17g, 10 mmol) in  $\text{CH}_2\text{Cl}_2$  (100 mL) was added pyridine-2,6-diamine (10 mmol, 1.09g), DCC (2.3g, 10 mmol), HOBt (1.5 g, 10 mmol) and DIPEA (1.25 mL, 10 mmol) at 0 °C. This reaction mixture was stirred at room temperature for 24 h. The solution was filtered and washed with aqueous  $\text{NaHCO}_3$ . The organic phase was evaporated under reduced pressure and purified by column chromatography (silica gel) to give the pure product **A** (1.43 g, 46%).  $[\alpha]_{\text{D}}^{25} = -10.0$  ( $c = 0.24$ ,  $\text{CHCl}_3$ );  $^1\text{H}$  NMR (300 MHz,  $\text{CDCl}_3$ )  $\delta$  0.95 (d,  $J = 6.9$  Hz, 3H), 1.01 (d,  $J = 6.9$  Hz, 3H), 1.47 (s, 9H), 2.22-2.28 (m, 1H), 4.10-4.17 (m, 1H), 4.35 (br, 2H), 5.12 (m, 1H), 6.27 (d,  $J = 7.8$  Hz, 1H), 7.28 (t,  $J = 7.8$  Hz, 1H), 7.57 (d,  $J = 7.8$  Hz, 1H), 8.12 (br, 1H);  $^{13}\text{C}$  NMR (125Hz,  $\text{CDCl}_3$ )  $\delta$  24.61, 27.59, 30.69, 42.61, 57.08, 73.96, 121.97, 122.81, 129.38, 133.17, 143.26, 148.25, 214.79; MS (ESI) 331.2

(M+Na)<sup>+</sup>; HRMS exact mass calcd for (C<sub>15</sub>H<sub>24</sub>O<sub>4</sub>N<sub>3</sub>+Na) requires m/z 331.1746, found m/z 331.1750.

Product **A** (0.92 g, 3 mmol) was dissolved in THF (30 mL). The solution was cooled down to 0 °C and TEA (1 mL, 6.6 mmol) was added. Then to this solution Benzoyl Chloride (0.38 mL, 3.3 mmol) was added dropwise at 0 °C. After the solution was stirred at 0 °C for 30 min, the resulting solution was stirred at room temperature overnight. The solid was filtered off and solvent removed, the residue was purified through column chromatography on silica gel (eluent: Hexane Ethyl Acetate = 3:1) to give the product (1.11g, 90%).

The obtained N-Boc compound (1.11g) was dissolved into DCM (5 mL) and TFA (5 mL) and stirred at rt for 4h. The reaction mixture was evaporated and dissolved in Ethyl Acetate. 1 N NaOH solution was used to tune pH to 9 and The mixture was extracted with Ethyl Acetate. Then the solvent was evaporated to dryness to get the pure product **1a** (0.82g, 97%).

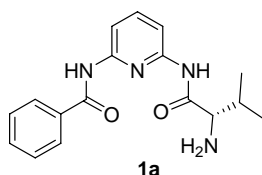

**(S)-N-(6-(2-amino-3-methylbutanamido)pyridin-2-yl)benzamide (1a)** [ $\alpha$ ]<sub>D</sub><sup>25</sup> = +6.5 (c = 0.15, CHCl<sub>3</sub>); <sup>1</sup>H NMR (500 MHz, DMSO)  $\delta$  0.87 (d, *J* = 7.0 Hz, 3H), 0.98 (d, *J* = 7.0 Hz, 3H), 2.15-2.17 (m, 1H), 3.42 (m, 1H), 7.51-7.61(m, 3H), 7.87-7.89 (m, 3H), 8.00-8.02 (m, 2H), 10.56 (s, 1H). <sup>13</sup>C NMR (125Hz, DMSO)  $\delta$  16.24, 19.11, 30.67, 60.16, 109.51, 109.86, 127.07, 128.49, 132.01, 133.87, 140.40, 149.05, 149.77, 165.68, 172.02. MS (ESI) 313.2 (M+H)<sup>+</sup>; HRMS exact mass calcd for (C<sub>17</sub>H<sub>20</sub>N<sub>4</sub>O<sub>2</sub>+H) requires m/z 313.1664, found m/z 313.1653.

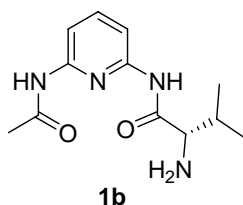

**(S)-N-(6-acetamidopyridin-2-yl)-2-amino-3-methylbutanamide(1b)**  $[\alpha]_D^{25} = +37.0$  ( $c = 0.12$ ,  $\text{CHCl}_3$ );  $^1\text{H}$  NMR (500 MHz, DMSO)  $\delta$  0.78 (d,  $J = 7.0$  Hz, 3H), 0.92 (d,  $J = 7.0$  Hz, 3H), 2.05-2.10 (m, 4H), 3.22 (m, 1H), 7.73-7.75 (m, 3H), 10.29 (s, 1H).  $^{13}\text{C}$  NMR (125 Hz, DMSO)  $\delta$  16.94, 19.90, 24.36, 31.39, 60.49, 108.20, 109.17, 140.77, 149.89, 151.12, 169.69, 174.42. MS (ESI) 248.9 ( $\text{M}-\text{H}^-$ ); HRMS exact mass calcd for ( $\text{C}_{12}\text{H}_{18}\text{N}_4\text{O}_2+\text{H}$ ) requires  $m/z$  251.1508, found  $m/z$  251.1500.

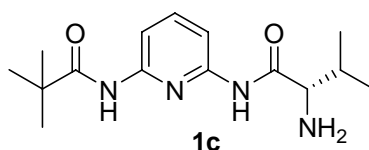

**(S)-2-amino-3-methyl-N-(6-pivalamidopyridin-2-yl)butanamide (1c)**  $[\alpha]_D^{25} = +3.9$  ( $c = 0.21$ ,  $\text{CHCl}_3$ );  $^1\text{H}$  NMR (500 MHz,  $\text{CD}_3\text{OD}$ )  $\delta$  1.04 (d,  $J = 6.5$  Hz, 3H), 1.09 (d,  $J = 6.5$  Hz, 3H), 1.29 (s, 9H), 3.34 (m, 1H), 7.68 (m, 1H), 7.73 (d,  $J = 8.0$  Hz, 1H), 7.82 (d,  $J = 8.0$  Hz, 1H).  $^{13}\text{C}$  NMR (125 Hz,  $\text{CD}_3\text{OD}$ )  $\delta$  15.89, 17.74, 36.15, 36.17, 39.43, 56.07, 109.08, 109.23, 139.96, 149.44, 150.53, 169.23, 178.31. MS (ESI) 293.2 ( $\text{M}+\text{H}^+$ ); HRMS exact mass calcd for ( $\text{C}_{15}\text{H}_{24}\text{N}_4\text{O}_2+\text{H}$ ) requires  $m/z$  293.1977 found  $m/z$  293.1976.

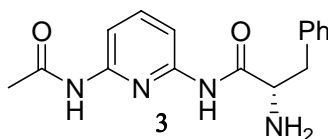

**(S)-N-(6-acetamidopyridin-2-yl)-2-amino-3-phenylpropanamide (3)**  $[\alpha]_D^{25} = -8.8$  ( $c = 0.12$ ,  $\text{CHCl}_3$ );  $^1\text{H}$  NMR (500 MHz, DMSO)  $\delta$  2.06 (s, 3H), 2.71 (dd,  $J = 9.0, 13.5$  Hz, 1H), 3.10 (dd,  $J = 4.5, 9.0$  Hz, 1H), 3.64 (m, 1H), 7.25-7.27 (m, 5H), 7.75-7.77 (m, 3H), 10.29 (s, 1H).  $^{13}\text{C}$  NMR (125 Hz, DMSO)  $\delta$  24.36, 40.51, 56.86, 108.20, 109.26, 126.75, 128.69, 129.76, 138.84, 140.79, 149.90, 151.12, 169.71, 174.12. MS (ESI) 321.2 ( $\text{M}+\text{Na}^+$ ); HRMS exact mass calcd for ( $\text{C}_{16}\text{H}_{18}\text{N}_4\text{O}_2+\text{H}$ ) requires  $m/z$  299.1508, found  $m/z$  299.1500.

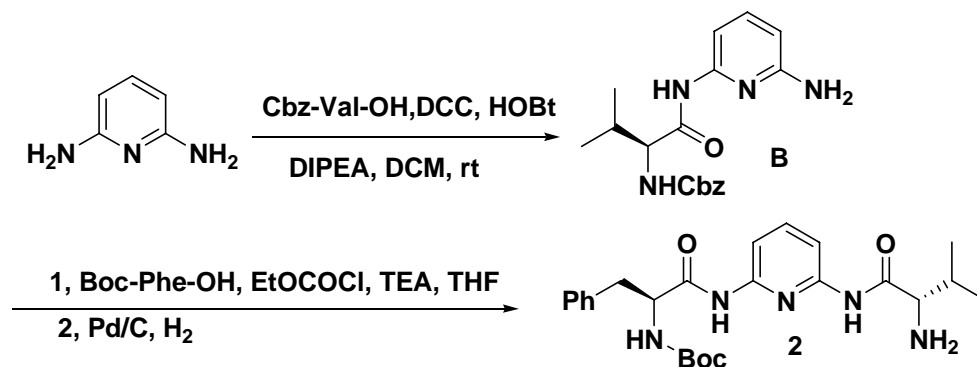

To a stirred solution of N-Cbz-L-valine (2.51 g, 10 mmol) in CH<sub>2</sub>Cl<sub>2</sub> (100 mL) was added pyridine-2,6-diamine (1.09 g, 10 mmol), DCC (2.3 g, 10 mmol), HOBT (1.5 g, 10 mmol) and DIPEA (1.25 mL, 10 mmol) at 0 °C. This reaction mixture was stirred at room temperature for 24 h. The solution was filtered and washed with aqueous NaHCO<sub>3</sub>. The organic phase was evaporated under reduced pressure and purified by column chromatography (silica gel) to give the pure product **B** (1.7 g, 49%).

N-Boc-L-Phenylalanine (1.0 g, 2.9 mmol) was dissolved in THF (20 mL). The solution was cooled down to 0 °C. TEA (0.6 mL, 4.4 mmol) was added. Then to this solution ethylchloroformate (0.45 mL, 4.4 mmol) was added dropwise for 15 min. After the solution was stirred at 0 °C for 45 min, amine **B** (1.0 g, 2.9 mmol) was added slowly for 10 minutes in 10 mL THF solution at 0 °C. The resulting solution was stirred at room temperature for 16 h, and then refluxed for 3 h. After cooling down to room temperature, the solid was filtered off and solvent removed. The oily product was then dissolved in DCM. The mixture was washed with aqueous NaHCO<sub>3</sub> and dried with anhydrous Na<sub>2</sub>SO<sub>4</sub>. After removal of the solvent, the residue was purified through column chromatography on silica gel (eluent: Hexane: Ethyl Acetate = 2:1) to give the product (0.96 g, yield: 56%).<sup>1</sup>

The obtained compound (0.96 g), 10% Pd/C (200 mg) and methanol (30 mL) were mixed in a 100 mL flask. After stirring under hydrogen (1 atm) for 4 h, the solution was filtered on Celite to remove the Pd/C, and then evaporated to dryness to give the products **2** (0.74 g, yield: 99 %).

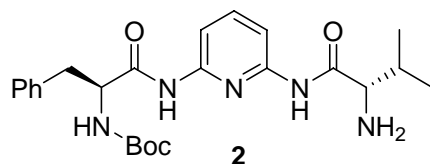

$[\alpha]_D^{25} = -6.2$  ( $c = 0.08$ ,  $\text{CHCl}_3$ );  $^1\text{H NMR}$  (500 MHz,  $\text{CDCl}_3$ )  $\delta$  1.15 (d,  $J = 6.5$  Hz, 3H), 1.28 (d,  $J = 6.5$  Hz, 3H), 1.45 (s, 9H), 2.33 (m, 1H), 3.05-3.20 (m, 2H), 3.57-3.69 (m, 1H), 4.52 (m, 1H), 5.11 (m, 1H), 7.24-7.33 (m, 6H), 7.63-7.73 (m, 2H), 7.93 (m, 1H).  $^{13}\text{C NMR}$  (125Hz,  $\text{CDCl}_3$ )  $\delta$  16.91, 19.45, 26.87, 27.88, 28.25, 28.84, 63.10, 78.70, 109.25, 110.01, 127.00, 128.55, 128.68, 129.20, 129.31, 129.72, 148.28, 149.05x, 170.24, 174.74. MS(ESI) 456.3 ( $\text{M}+\text{H}$ ) $^+$ ; HRMS exact mass calcd for ( $\text{C}_{24}\text{H}_{33}\text{N}_5\text{O}_4+\text{H}$ ) requires  $m/z$  456.2611, found  $m/z$  456.2604.

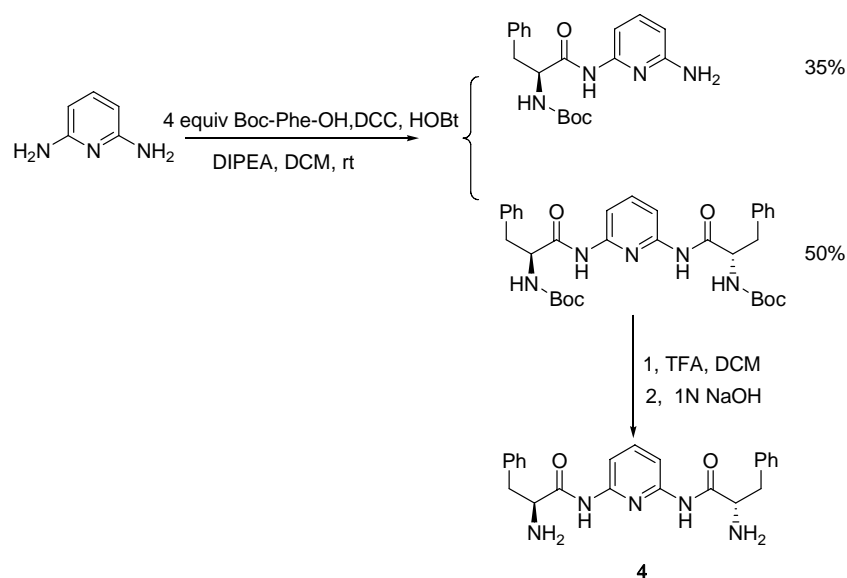

Procedure as synthesis of compound **1**.

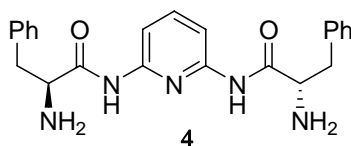

**(2S,2'S)-N,N'-(pyridine-2,6-diyl)bis(2-amino-3-phenylpropanamide) (4)**  $[\alpha]_D^{25} = -13.3$  ( $c = 0.15$ ,  $\text{CHCl}_3$ );  $^1\text{H NMR}$  (500 MHz,  $\text{CD}_3\text{OD}$ )  $\delta$  2.89 (dd,  $J = 7.5, 13.5$  Hz, 1H), 3.14 (dd,  $J = 5.5, 13.5$  Hz, 1H), 3.74 (t,  $J = 6.5$  Hz, 1H), 7.22-7.31 (m, 10H), 7.75-7.85 (m, 3H).  $^{13}\text{C NMR}$  (125Hz,  $\text{CD}_3\text{OD}$ )  $\delta$  45.03, 61.73, 112.82, 124.01, 132.78, 134.01, 135.14, 143.62, 155.09, 179.18. MS (ESI) 404.3 ( $\text{M}+\text{H}$ ) $^+$ ; HRMS

exact mass calcd for (C<sub>23</sub>H<sub>25</sub>N<sub>5</sub>O<sub>2</sub>+H) requires m/z 404.2086, found m/z 404.2079.

**General procedure of the enantioselective aldol reaction:** A mixture of CuCl<sub>2</sub> (5.4 mg, 0.04 mmol, 20 mol%), AgSbF<sub>6</sub> ( 27.5 mg, 0.08 mmol, 40 mol%), ligand **1c** ( 11.7 mg, 0.04 mmol, 20 mol%), and cyclohexanone (1 mL) was stirred at room temperature for 4 h. And then the aldehyde (0.2 mmol) was added. The resulting mixture was stirred for 12-48 h. After the reaction was completed (monitered by TLC), the reaction mixture was treated with saturated ammonium chloride solution, and extracted with ethyl acetate. After removal of the solvent, mixture <sup>1</sup>H NMR was taken to determine diastereoselectivity. The mixture was purified through column chromatography on silica gel (eluent: mixture of Hexane and ethyl acetate) to give the pure products. All aldol products are known compounds and their spectroscopic data are identical with those reported. The ee values were determined by chiral HPLC analysis. The HPLC conditions and retention time were collected in **Table 1** .

**Table 1** HPLC Conditions and retention time

| Compound                                                                            | Eluent                | Flow rate | Column | Wave length | T(major) | T(minor) |
|-------------------------------------------------------------------------------------|-----------------------|-----------|--------|-------------|----------|----------|
|                                                                                     | <i>i</i> -PrOH/Hexane | (mL/min)  |        | (nm)        | (min)    | (min)    |
| 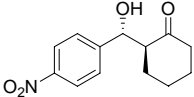   | 20/80                 | 1.0       | AD-H   | 254         | 16.8     | 13.1     |
|    | 20/80                 | 1.0       | AD-H   | 254         | 17.9     | 22.4     |
|    | 20/80                 | 0.8       | AD-H   | 254         | 19.2     | 20.8     |
|    | 20/80                 | 0.9       | AD-H   | 254         | 26.4     | 21.2     |
|   | 20/80                 | 1.0       | AS-H   | 254         | 15.6     | 22.3     |
|  | 10/90                 | 1.0       | AS-H   | 220         | 15.6     | 19.3     |
|  | 10/90                 | 1.0       | AS-H   | 220         | 20.8     | 18.3     |
|  | 10/90                 | 1.0       | AS-H   | 220         | 22.6     | 19.7     |
|  | 5/95                  | 0.5       | AS-H   | 220         | 34.1     | 36.8     |
|  | 10/90                 | 0.7       | AS-H   | 220         | 26.0     | 22.4     |
|  | 10/90                 | 0.7       | AS-H   | 220         | 15.0     | 18.4     |
|  | 5/95                  | 0.7       | AD-H   | 254         | 87.8     | 85.1     |



|                                                                                    |       |     |      |     |      |      |
|------------------------------------------------------------------------------------|-------|-----|------|-----|------|------|
| 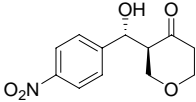  | 20/80 | 1.0 | AD-H | 254 | 21.3 | 17.8 |
|   | 20/80 | 1.0 | AD-H | 254 | 31.7 | 18.8 |
|   | 20/80 | 0.7 | AD-H | 254 | 24.8 | 20.4 |
|   | 20/80 | 0.7 | AD-H | 254 | 30.4 | 18.8 |
|   | 20/80 | 0.7 | AS-H | 220 | 22.7 | 34.5 |
|   | 20/80 | 0.7 | AS-H | 220 | 16.9 | 24.1 |
|  | 30/70 | 1.0 | AS-H | 254 | 15.0 | 18.8 |

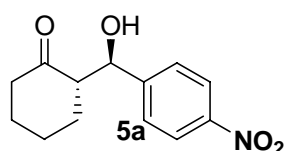

**(S)-2-((R)-hydroxy(4-nitrophenyl)methyl)cyclohexanone (5a)**<sup>2</sup> yield 90% ; dr >30/1; Ee 95% ;  $[\alpha]_D^{25} = +12.0$  (c= 0.20, CHCl<sub>3</sub>). <sup>1</sup>H NMR (500 MHz, CDCl<sub>3</sub>) δ 1.34-1.82 (m, 5H), 2.07 (m, 1H), 2.33-2.35 (m, 1H), 2.45-2.46 (m, 1H), 2.48-2.56 (m, 1H), 4.04 (s, 1H), 4.87 (dd, *J* = 3 Hz, 8.5 Hz, 1H), 7.48 (d, *J* = 8.5 Hz, 2H), 8.18 (d, *J* = 8.5 Hz, 2H). <sup>13</sup>C NMR (125Hz, CDCl<sub>3</sub>) δ 24.70, 27.63, 30.76, 42.68, 57.20, 74.02, 123.57, 127.87, 147.59, 148.37, 214.70.

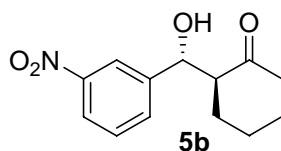

**(S)-2-((R)-hydroxy(3-nitrophenyl)methyl)cyclohexanone (5b)**<sup>3</sup> yield 90% ; dr 20/1; Ee 95% ;  $[\alpha]_D^{25} = +37.2$  (c= 0.50, CHCl<sub>3</sub>). <sup>1</sup>H NMR (500 MHz, CDCl<sub>3</sub>) δ

1.35-1.39 (m, 1H), 1.54-1.67 (m, 4H), 2.08-2.09 (m, 1H), 2.35-2.38 (m, 1H), 2.46-2.49 (m, 1H), 2.61(m, 1H), 4.14 (br, 1H), 4.88 (d,  $J = 8.5$  Hz, 1H), 7.49 (t,  $J = 8.0$  Hz, 1H), 8.18 (d,  $J = 7.5$  Hz, 2H), 8.12-8.19 (m, 1H), 8.20 (s, 1H).  $^{13}\text{C}$  NMR (125Hz,  $\text{CDCl}_3$ )  $\delta$  24.61, 27.59, 30.69, 42.61, 57.08, 73.96, 121.97, 122.81, 129.26, 133.17, 143.26, 148.25, 214.79.

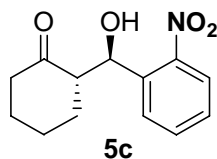

**(S)-2-((R)-hydroxy(2-nitrophenyl)methyl)cyclohexanone (5c)**<sup>3</sup> yield 82% ; dr >30/1; Ee 94% ;  $[\alpha]_{\text{D}}^{25} = +29.1$  ( $c = 0.31$ ,  $\text{CHCl}_3$ )  $^1\text{H}$  NMR (500 MHz,  $\text{CDCl}_3$ )  $\delta$  1.55-1.84 (m, 5H), 2.05-2.06 (m, 1H), 2.31-2.33 (m, 1H), 2.41-2.44 (m, 1H), 2.72-2.74 (m, 1H), 4.15 (br, 1H), 5.42 (d,  $J = 7.0$  Hz, 1H), 7.40-7.42 (m, 1H), 7.61 (m, 1H), 7.81 (m, 1H). 7.83 (m, 1H)  $^{13}\text{C}$  NMR (125Hz,  $\text{CDCl}_3$ )  $\delta$  24.96, 27.73, 31.09, 42.80, 57.28, 69.76, 124.06, 128.37, 128.98, 133.04, 136.60, 148.72, 214.91

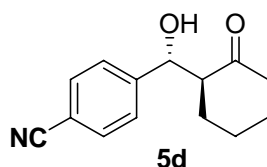

**4-((R)-hydroxy((S)-2-oxocyclohexyl)methyl)benzonitrile (5d)**<sup>3</sup> yield 93% ; dr 12/1 ; Ee 92% ;  $[\alpha]_{\text{D}}^{25} = +26.2$  ( $c = 0.41$ ,  $\text{CHCl}_3$ )  $^1\text{H}$  NMR (500 MHz,  $\text{CDCl}_3$ )  $\delta$  1.34-1.85 (m, 5H), 2.10-2.14 (m, 1H), 2.36-2.39 (m, 1H), 2.49 (m, 1H), 2.51-2.58 (m, 1H), 4.07 (s, 1H), 4.85 (dd,  $J = 3$  Hz, 8.5 Hz, 1H), 7.45 (d,  $J = 8.0$  Hz, 2H), 7.65 (d,  $J = 8.0$  Hz, 2H).  $^{13}\text{C}$  NMR (125Hz,  $\text{CDCl}_3$ )  $\delta$  24.68, 27.64, 30.73, 42.66, 57.14, 74.20, 111.69, 119.80, 127.78, 132.17, 146.41, 214.76.

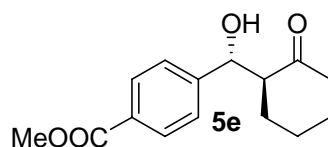

**methyl 4-((R)-hydroxy((S)-2-oxocyclohexyl)methyl)benzoate (5e)**<sup>3</sup> yield 89% ; dr 9/1 ; Ee 94% ;  $[\alpha]_D^{25} = +14.6$  (c= 0.27, CHCl<sub>3</sub>) <sup>1</sup>H NMR (500 MHz, CDCl<sub>3</sub>)  $\delta$  1.29-1.33 (m, 1H), 1.51-1.79 (m, 4H), 2.06-2.09 (m, 1H), 2.33-2.37 (m, 1H), 2.45-2.46 (m, 1H), 2.48-2.58 (m, 1H), 3.90 (s, 3H), 4.04 (s, 1H), 4.83 (d,  $J = 8.5$  Hz, 1H), 7.38 (d,  $J = 8.5$  Hz, 2H), 8.00 (d,  $J = 8.5$  Hz, 2H). <sup>13</sup>C NMR (125Hz, CDCl<sub>3</sub>)  $\delta$  24.64, 27.66, 30.71, 42.62, 52.04, 57.24, 74.32, 126.97, 129.62, 129.66, 146.05, 166.81, 215.04.

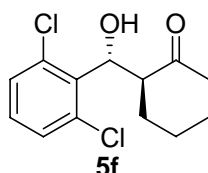

**(S)-2-((R)-(2,6-dichlorophenyl)(hydroxy)methyl)cyclohexanone (5f)**<sup>5</sup> yield 98% ; dr 12/1 ; Ee 92% ;  $[\alpha]_D^{25} = -41.5$  (c= 0.31, CHCl<sub>3</sub>) <sup>1</sup>H NMR (500 MHz, CDCl<sub>3</sub>)  $\delta$  1.36-1.40 (m, 1H), 1.52-1.85 (m, 4H), 2.08-2.10 (m, 1H), 2.41-2.54 (m, 2H), 3.49-3.52 (m, 1H), 3.70 (br, 1H), 5.85 (d,  $J = 10.0$  Hz, 1H), 7.17 (d,  $J = 8.0$  Hz, 1H), 7.32-7.33 (m, 2H). <sup>13</sup>C NMR (125Hz, CDCl<sub>3</sub>)  $\delta$  24.69, 27.63, 29.86, 42.44, 53.65, 70.57, 129.34, 129.75, 134.73, 135.69, 214.39.

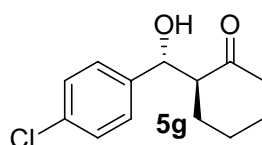

**(S)-2-((R)-(4-chlorophenyl)(hydroxy)methyl)cyclohexanone (5g)**<sup>3</sup> yield 73% ; dr 6/1 ; Ee 88% ;  $[\alpha]_D^{25} = +22.2$  (c= 0.20, CHCl<sub>3</sub>) <sup>1</sup>H NMR (500 MHz, CDCl<sub>3</sub>)  $\delta$  1.29-1.33 (m, 1H), 1.55-1.81 (m, 4H), 2.09-2.58 (m, 3H), 4.04 (s, 1H), 4.78 (d,  $J = 8.0$  Hz, 1H), 7.28 (d,  $J = 8.5$  Hz, 2H), 7.34 (d,  $J = 8.5$  Hz, 2H). <sup>13</sup>C NMR (125Hz, CDCl<sub>3</sub>)  $\delta$  24.72, 27.72, 30.76, 42.68, 57.38, 74.14, 128.39, 128.54, 138.59, 139.50, 215.29.

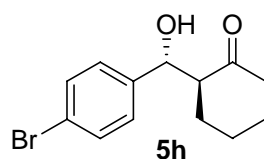

**(S)-2-((R)-(4-bromophenyl)(hydroxy)methyl)cyclohexanone (5h)<sup>3</sup>** yield 60% ; dr 6/1 ; Ee 94% ;  $[\alpha]_D^{25} = +20.2$  (c= 0.30, CHCl<sub>3</sub>) <sup>1</sup>H NMR (500 MHz, CDCl<sub>3</sub>)  $\delta$  1.27-1.30 (m, 1H), 1.52-1.78 (m, 4H), 2.33-2.35 (m, 1H), 2.07-2.08 (m, 1H), 2.33-2.35 (m, 1H), 2.45-2.54 (m, 2H), 3.98 (s, 1H), 4.74 (d,  $J = 9.0$  Hz, 1H), 7.18 (dd,  $J = 1.5, 6.5$  Hz, 2H), 7.46 (dd,  $J = 2.0, 6.5$  Hz, 2H). <sup>13</sup>C NMR (125Hz, CDCl<sub>3</sub>)  $\delta$  24.68, 27.69, 30.72, 42.63, 57.30, 74.15, 121.68, 128.71, 131.45, 140.00, 215.21.

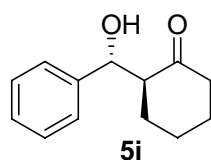

**(S)-2-((R)-hydroxy(phenyl)methyl)cyclohexanone (5i)<sup>3</sup>** yield 76% ; dr 10/1 ; Ee 86% ;  $[\alpha]_D^{25} = +20.9$  (c= 0.31, CHCl<sub>3</sub>) <sup>1</sup>H NMR (500 MHz, CDCl<sub>3</sub>)  $\delta$  1.28-1.31 (m, 1H), 1.52-1.77 (m, 4H), 2.35-2.36 (m, 1H), 2.06 (m, 1H), 2.35-2.36 (m, 1H), 2.46-2.47 (m, 1H), 2.49-2.62 (m, 1H), 3.94 (s, 1H), 4.78 (d,  $J = 8.5$  Hz, 1H), 7.2-7.34 (m, 5H). <sup>13</sup>C NMR (125Hz, CDCl<sub>3</sub>)  $\delta$  24.68, 27.77, 30.81, 42.63, 57.40, 74.71, 126.99, 127.85, 128.33, 140.92, 215.48.

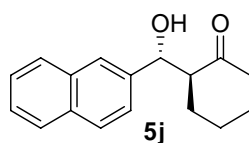

**(S)-2-((R)-hydroxy(naphthalen-2-yl)methyl)cyclohexanone (5j)<sup>5</sup>** yield 71% ; dr 12/1 ; Ee 90% ;  $[\alpha]_D^{25} = +7.3$  (c= 0.30, CHCl<sub>3</sub>) <sup>1</sup>H NMR (500 MHz, CDCl<sub>3</sub>)  $\delta$  1.32-1.35 (m, 1H), 1.50-1.76 (m, 4H), 2.06 (m, 1H), 2.36-2.38 (m, 1H), 2.48 (m, 1H), 2.72 (m, 1H), 2.49-2.62 (m, 1H), 4.08 (br, 1H), 4.96 (d,  $J = 9.0$  Hz, 1H), 7.46-7.49 (m, 3H), 7.76 (s, 1H), 7.82-7.85 (m, 3H). <sup>13</sup>C NMR (125Hz, CDCl<sub>3</sub>)  $\delta$  24.71, 27.80, 30.92, 42.71, 57.41, 74.92, 124.68, 125.95, 126.15, 126.26, 127.70, 127.99, 128.28,

133.17, 133.21, 138.38, 215.49

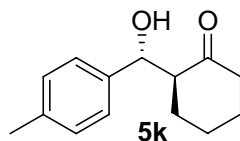

**(S)-2-((R)-hydroxy(p-tolyl)methyl)cyclohexanone (5k)**<sup>6</sup> yield 75% ; dr 8/1 ; Ee 83% ;  $[\alpha]_D^{25} = +9.3$  (c= 0.40, CHCl<sub>3</sub>) <sup>1</sup>H NMR (500 MHz, CDCl<sub>3</sub>)  $\delta$  1.26-1.29 (m, 1H), 1.52-1.78 (m, 4H), 2.05-2.07 (m, 1H), 2.33-2.45 (m, 4H), 2.46-2.48 (m, 1H), 2.60 (m, 1H), 3.91 (br, 1H), 4.74 (d,  $J = 8.5$  Hz, 1H), 7.14 (d,  $J = 8.0$  Hz, 2H), 7.18 (d,  $J = 7.0$  Hz, 2H). <sup>13</sup>C NMR (125Hz, CDCl<sub>3</sub>)  $\delta$  21.11, 24.69, 27.79, 30.84, 42.64, 57.42, 74.50, 125.66, 126.89, 129.01, 137.50, 215.56.

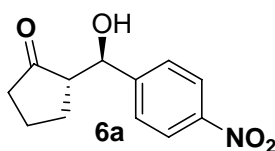

**(S)-2-((R)-hydroxy(4-nitrophenyl)methyl)cyclopentanone (6a)**<sup>2</sup> yield 66% ; dr 3/1 ; Ee 86% ;  $[\alpha]_D^{25} = -60.0$  (c= 0.40, CHCl<sub>3</sub>) <sup>1</sup>H NMR (500 MHz, CDCl<sub>3</sub>)  $\delta$  1.60-1.79 (m, 3H), 1.97-2.49 (m, 5H), 2.99 (br, 0.18 H, -OH, syn), 4.77 (br, 1H, -OH, anti), 4.86 (d,  $J = 8.5$  Hz, 0.81H, -CHOH, anti), 5.41 (s, 0.21H, -CHOH, syn), 7.54 (d,  $J = 8.5$  Hz, 2H), 8.20 (d,  $J = 8.5$  Hz, 2H).

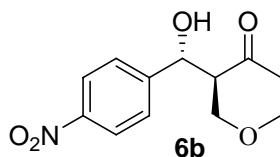

**(S)-3-((R)-hydroxy(4-nitrophenyl)methyl)-tetrahydropyran-4-one (6b)**<sup>4</sup> yield 97% ; dr 10/1 ; Ee 87% ;  $[\alpha]_D^{25} = 1.7$  (c= 0.20, CHCl<sub>3</sub>) <sup>1</sup>H NMR (500 MHz, CDCl<sub>3</sub>)  $\delta$  2.50-2.54 (m, 1H), 2.64-2.66 (m, 1H), 2.87-2.90 (m, 1H), 3.42-3.47 (m, 1H), 3.69-3.75 (m, 2H), 4.16-4.19 (m, 1H), 4.98 (d,  $J = 8.0$  Hz, 1H), 7.50 (d,  $J = 9.0$  Hz, 2H), 8.20 (d,  $J = 9.0$  Hz, 2H). <sup>13</sup>C NMR (125Hz, CDCl<sub>3</sub>)  $\delta$  42.81, 57.64, 68.33, 69.75, 71.30, 123.81, 127.46, 147.46, 147.76, 209.13.

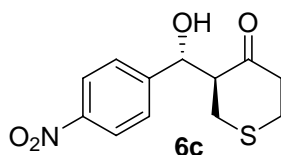

**(S)-3-((R)-hydroxy(4-nitrophenyl)methyl)-tetrahydrothiopyran-4-one (6c)**<sup>4</sup> yield 82% ; dr 22/1 ; Ee 94% ;  $[\alpha]_D^{25} = 15.0$  (c= 0.50, CHCl<sub>3</sub>) <sup>1</sup>H NMR (500 MHz, CDCl<sub>3</sub>)  $\delta$  2.54-2.56 (m, 1H), 2.64-2.69 (m, 1H), 2.77-2.87 (m, 2H), 2.95-3.00 (m, 3H), 3.69 (br, 1H), 5.07 (d,  $J = 8.0$  Hz, 1H), 7.55 (d,  $J = 8.5$  Hz, 2H), 8.22-8.24 (m, 2H). <sup>13</sup>C NMR (125Hz, CDCl<sub>3</sub>)  $\delta$  30.80, 32.80, 44.70, 59.46, 73.15, 123.79, 126.72, 127.81, 147.74, 211.14.

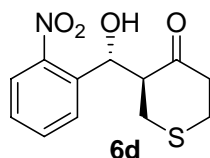

**(S)-3-((R)-hydroxy(2-nitrophenyl)methyl)-tetrahydrothiopyran-4-one (6d)**<sup>4</sup> yield 76% ; dr 25/1 ; Ee 94% ;  $[\alpha]_D^{25} = -30.0$  (c= 0.37, CHCl<sub>3</sub>) <sup>1</sup>H NMR (500 MHz, CDCl<sub>3</sub>)  $\delta$  2.60-2.64 (m, 1H), 2.75-2.83 (m, 2H), 2.94-3.15 (m, 3H), 3.16-3.18 (m, 1H), 3.90 (br, 1H), 5.55 (d,  $J = 7.0$  Hz, 1H), 7.46 (d,  $J = 7.5$  Hz, 1H), 7.66 ((d,  $J = 7.5$  Hz, 1H), 7.77 (d,  $J = 7.0$  Hz, 1H), 7.89 (d,  $J = 7.0$  Hz, 1H) . <sup>13</sup>C NMR (125Hz, CDCl<sub>3</sub>)  $\delta$  30.78, 33.36, 45.16, 59.55, 69.37, 124.39, 128.85, 129.03, 133.48, 136.00, 148.59, 211.46.

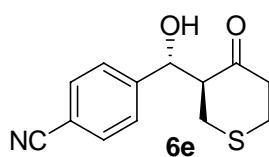

**4-((R)-hydroxy((S)-4-oxo-tetrahydro-2H-thiopyran-3-yl)methyl)benzotrile(6e)**<sup>4</sup> yield 86% ; dr 46/1 ; Ee 91% ;  $[\alpha]_D^{25} = +7.73$  (c= 0.42, CHCl<sub>3</sub>) <sup>1</sup>H NMR (500 MHz, CDCl<sub>3</sub>)  $\delta$  2.47-2.52 (m, 1H), 2.62-2.66 (m, 1H), 2.76-2.85 (m, 2H), 2.95-3.00 (m, 3H), 3.65 (br, 1H), 4.99 (d,  $J = 8.5$  Hz, 1H), 7.47 (d,  $J = 8.0$  Hz, 2H), 7.66 (d,  $J = 8.5$  Hz, 2H). <sup>13</sup>C NMR (125Hz, CDCl<sub>3</sub>)  $\delta$  30.82, 32.82, 44.75, 59.44, 73.42, 112.17, 118.51, 127.68, 132.44, 145.68, 211.29.

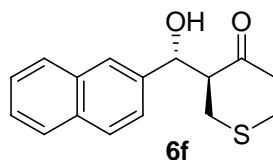

**(S)-3-((R)-hydroxy(naphthalen-2-yl)methyl)-tetrahydrothiopyran-4-one(6f)**<sup>7</sup> yield 57% ; dr 34/1 ; Ee 87% ;  $[\alpha]_{\text{D}}^{25} = +23.4$  (c= 0.12, CHCl<sub>3</sub>) <sup>1</sup>H NMR (500 MHz, CDCl<sub>3</sub>)  $\delta$  2.53-2.56 (m, 2H), 2.82-2.99 (m, 4H), 3.11-3.16 (m, 1H), 5.18 (d,  $J = 8.5$  Hz, 1H), 7.51-7.53 (m, 3H), 7.81 (s, 1H), 7.86-7.89 (m, 4H). <sup>13</sup>C NMR (125Hz, CDCl<sub>3</sub>)  $\delta$  30.89, 32.99, 44.54, 59.63, 74.03, 124.26, 126.24, 126.36, 127.72, 127.99, 128.72, 133.11, 133.32, 137.58, 211.83.

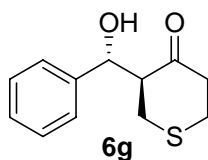

**(S)-3-((R)-hydroxy(phenyl)methyl)-tetrahydrothiopyran-4-one(5r)**<sup>4</sup> yield 68% ; dr 25/1 ; Ee 94% ;  $[\alpha]_{\text{D}}^{25} = +21.0$  (c= 0.30, CHCl<sub>3</sub>) <sup>1</sup>H NMR (500 MHz, CDCl<sub>3</sub>)  $\delta$  2.54-2.62 (m, 2H), 2.79-2.82 (m, 3H), 2.98-3.03 (m, 3H), 4.99 (d,  $J = 8.5$  Hz, 1H), 7.34-7.38 (m, 5H). <sup>13</sup>C NMR (125Hz, CDCl<sub>3</sub>)  $\delta$  30.88, 32.91, 44.46, 59.67, 73.82, 126.91, 128.32, 128.65, 140.24, 211.82, 211.82.

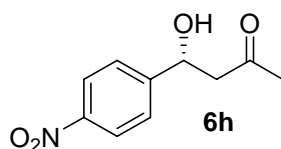

**(R)-4-hydroxy-4-(4-nitrophenyl)butan-2-one (5s)**<sup>2</sup> yield 84% ; Ee 72 % ;  $[\alpha]_{\text{D}}^{25} = 35.2$  (c= 0.2, CHCl<sub>3</sub>) <sup>1</sup>H NMR (500 MHz, CDCl<sub>3</sub>)  $\delta$  2.18 (s, 3H), 2.82 (m, 2H), 3.65 (s, 1H), 5.23 (t,  $J = 6$  Hz, 1H), 7.50 (d,  $J = 8.5$  Hz, 2H), 8.15 (d,  $J = 8.5$  Hz, 2H). <sup>13</sup>C NMR (125Hz, CDCl<sub>3</sub>)  $\delta$  30.70, 51.52, 68.91, 123.75, 126.43, 147.10, 150.06, 208.44.

## NMR Copy of the aldol products and ligands

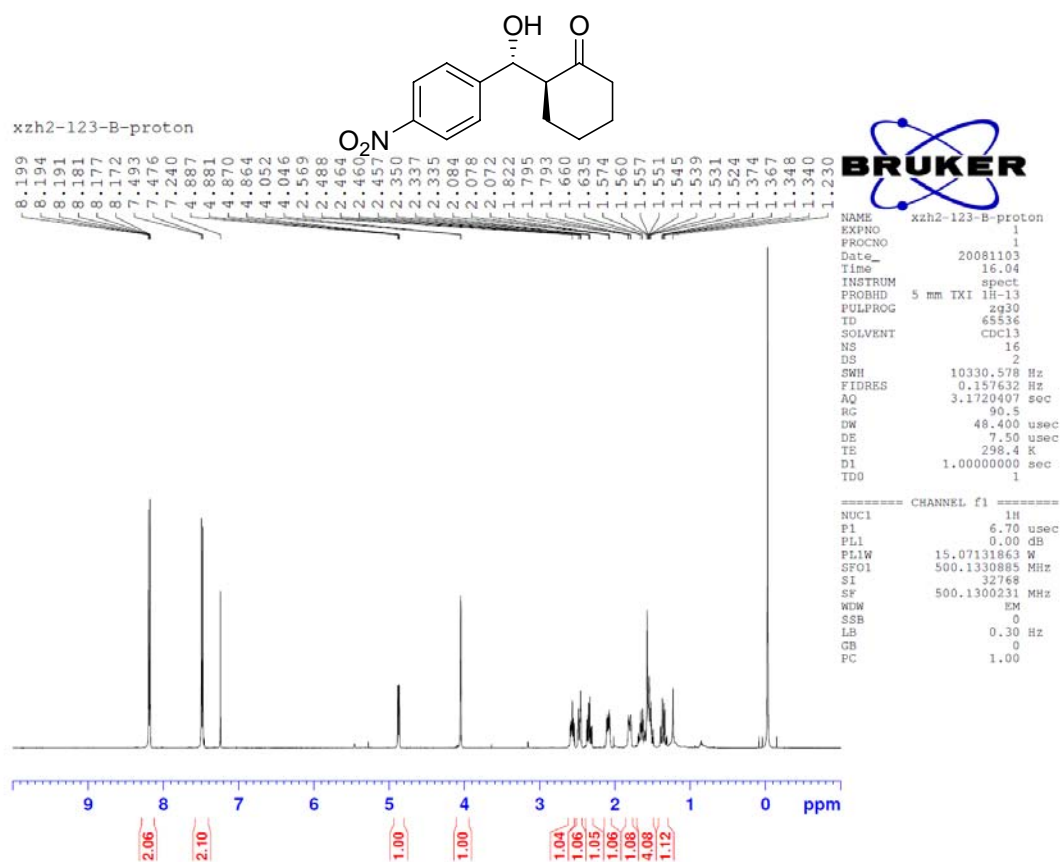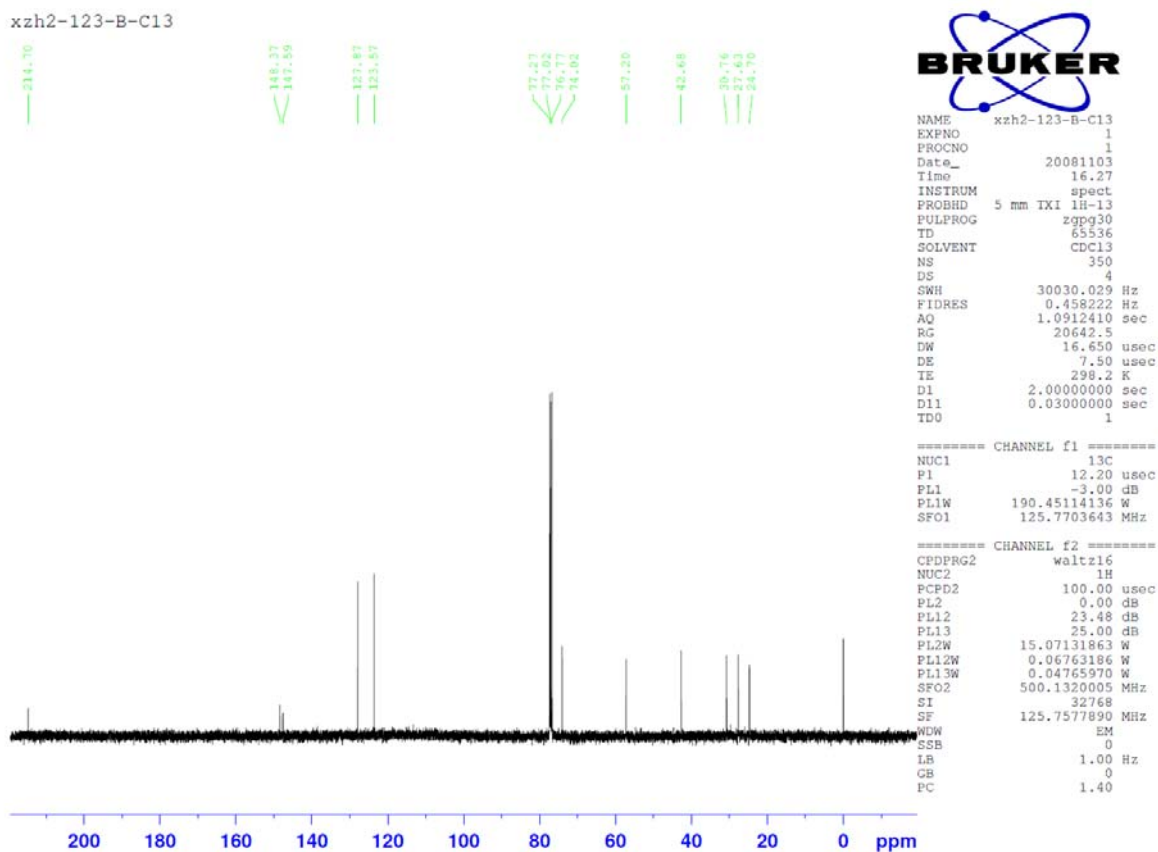



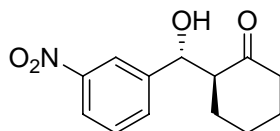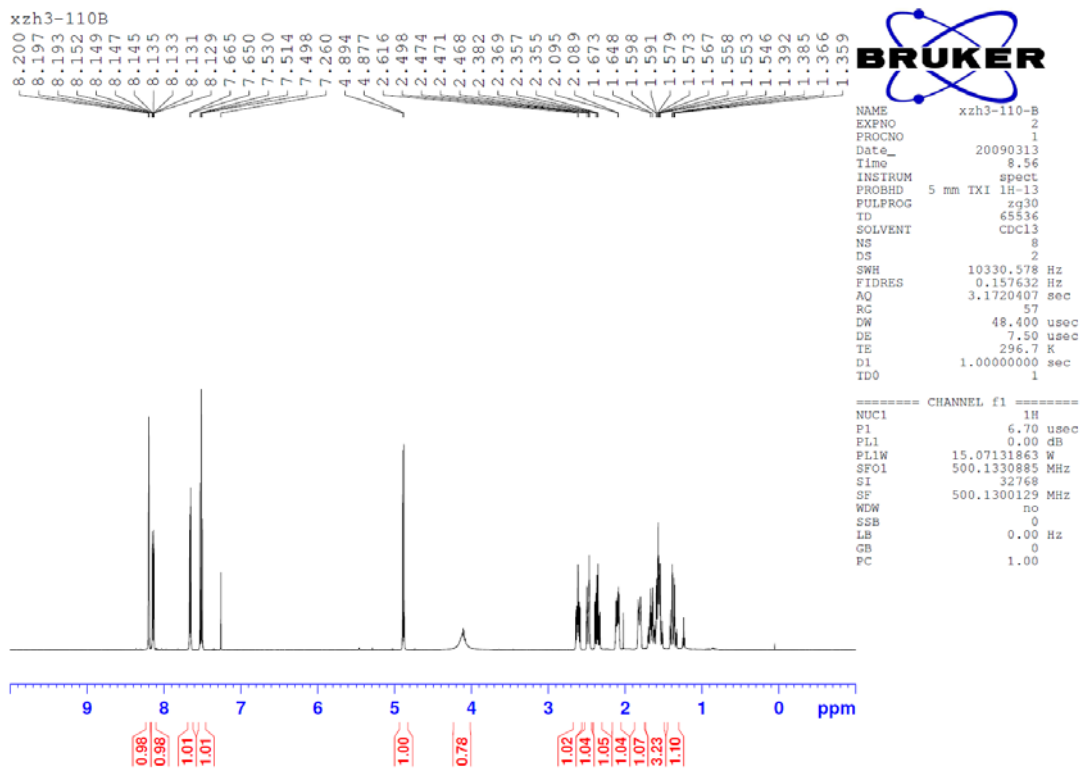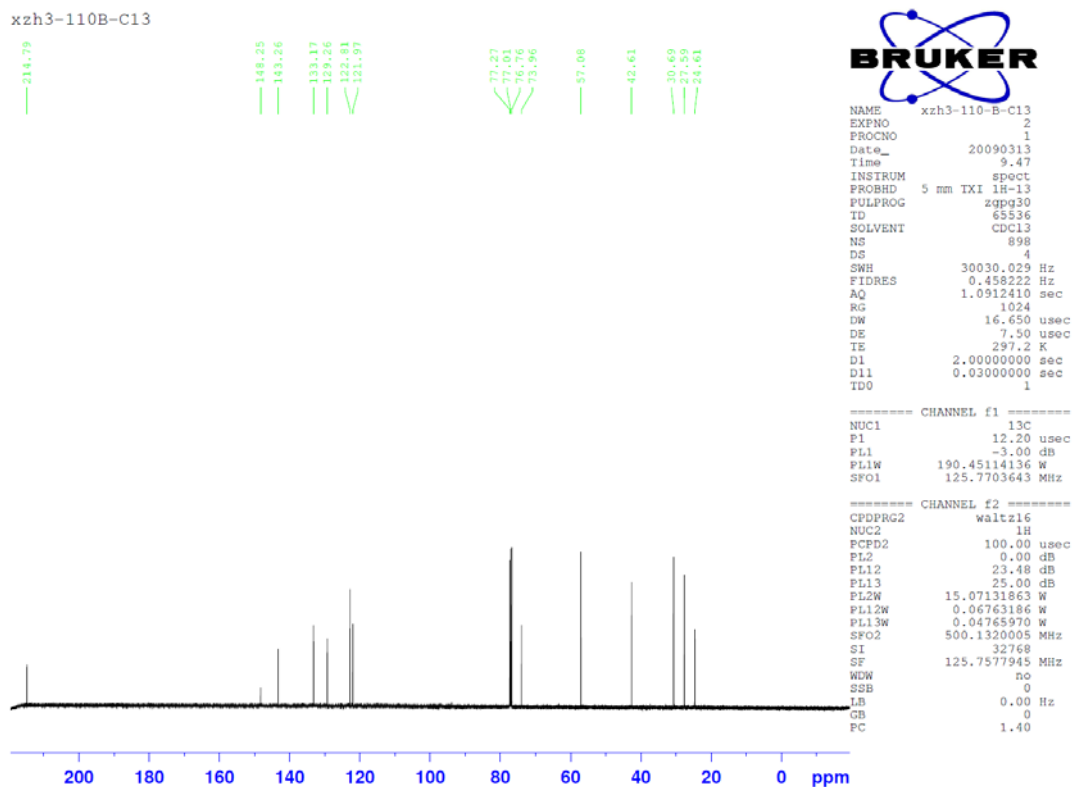

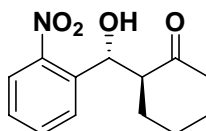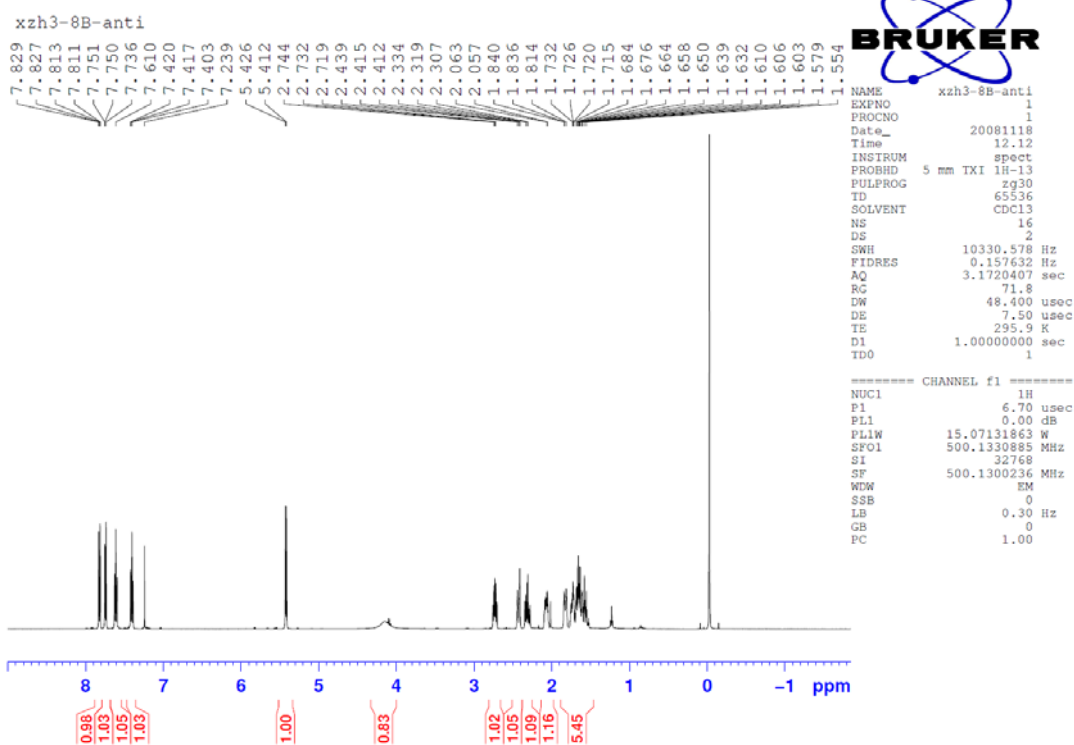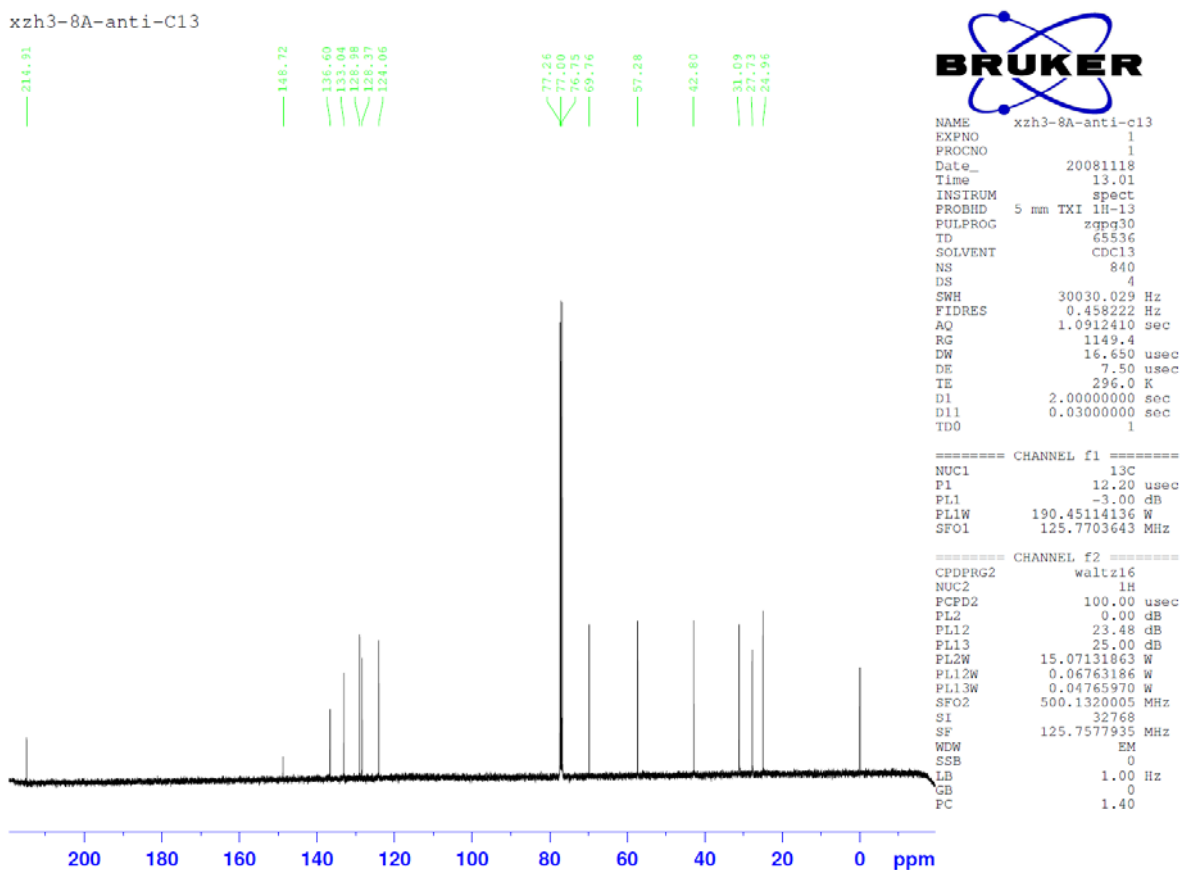

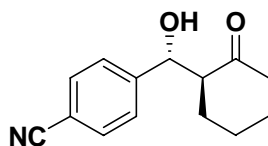

xzh3-11B-H

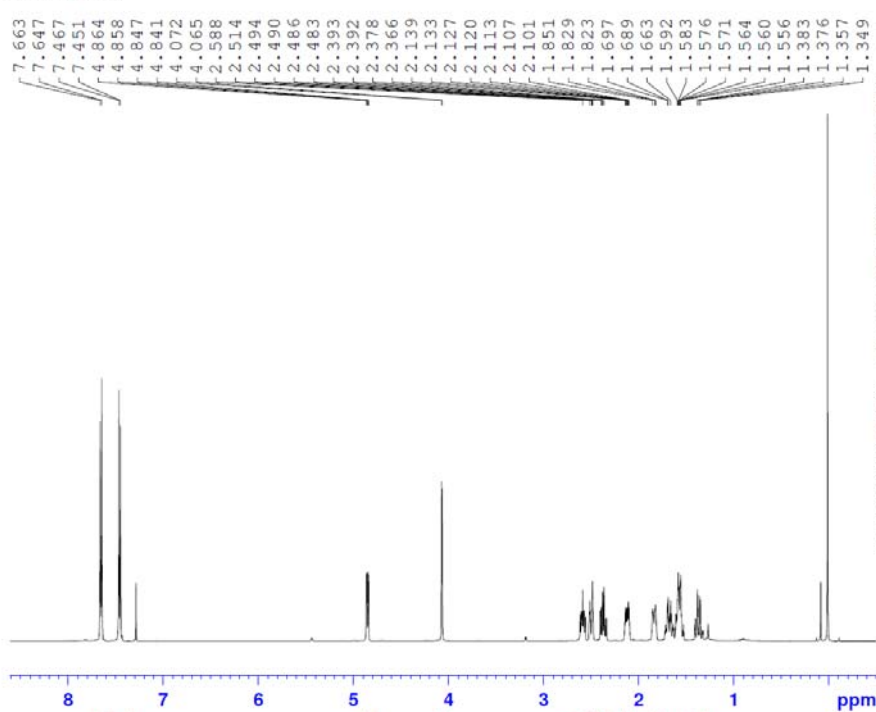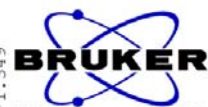

```

NAME      xzh3-11B-H
EXPNO     1
PROCNO    1
Date_     20081118
Time      19.19
INSTRUM   spect
PROBHD    5 mm TXI 1H-13
PULPROG   zg30
TD         65536
SOLVENT   CDCl3
NS         16
DS         2
SWH       10330.578 Hz
FIDRES    0.157632 Hz
AQ         3.1720407 sec
RG         57
DW         48.400 usec
DE         7.50 usec
TE         298.3 K
D1         1.00000000 sec
TD0        1

===== CHANNEL f1 =====
NUC1      1H
P1         6.70 usec
PL1        0.00 dB
PL1W       15.07131863 W
SF01      500.1330885 MHz
SI         32768
SF         500.1300000 MHz
WDW        EM
SSB        0
LB         0.30 Hz
GB         0
PC         1.00
    
```

xzh3-11B-C13

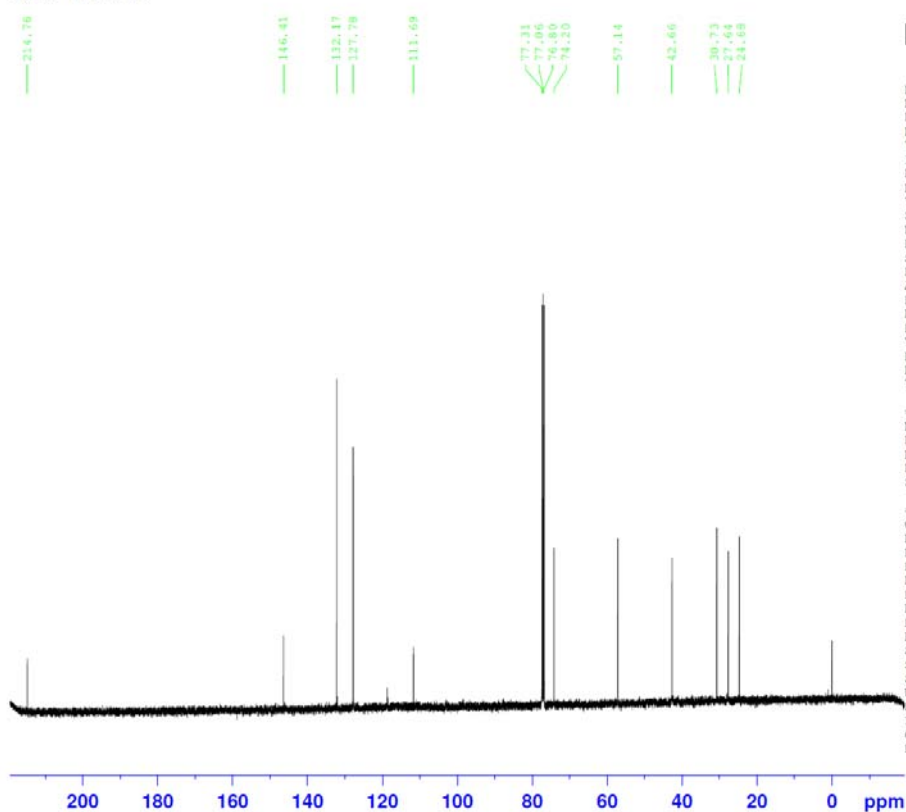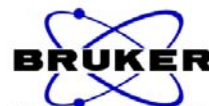

```

NAME      xzh3-11B-C13
EXPNO     1
PROCNO    1
Date_     20081118
Time      19.38
INSTRUM   spect
PROBHD    5 mm TXI 1H-13
PULPROG   zgpg30
TD         65536
SOLVENT   CDCl3
NS         303
DS         4
SWH       30030.029 Hz
FIDRES    0.458222 Hz
AQ         1.0912410 sec
RG         3251
DW         16.650 usec
DE         7.50 usec
TE         298.7 K
D1         2.00000000 sec
D11        0.03000000 sec
TD0        1

===== CHANNEL f1 =====
NUC1      13C
P1        12.20 usec
PL1        -3.00 dB
PL1W       190.45114136 W
SF01      125.7703643 MHz

===== CHANNEL f2 =====
CPDPRG2   waltz16
NUC2      1H
PCPD2     100.00 usec
PL2        0.00 dB
PL12       23.48 dB
PL13       25.00 dB
PL2W       15.07131863 W
PL12W      0.06763186 W
PL13W      0.04765970 W
SF02      500.1320005 MHz
SI         32768
SF         125.7577890 MHz
WDW        EM
SSB        0
LB         1.00 Hz
GB         0
PC         1.40
    
```

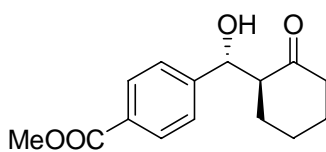

xzh3-110-F

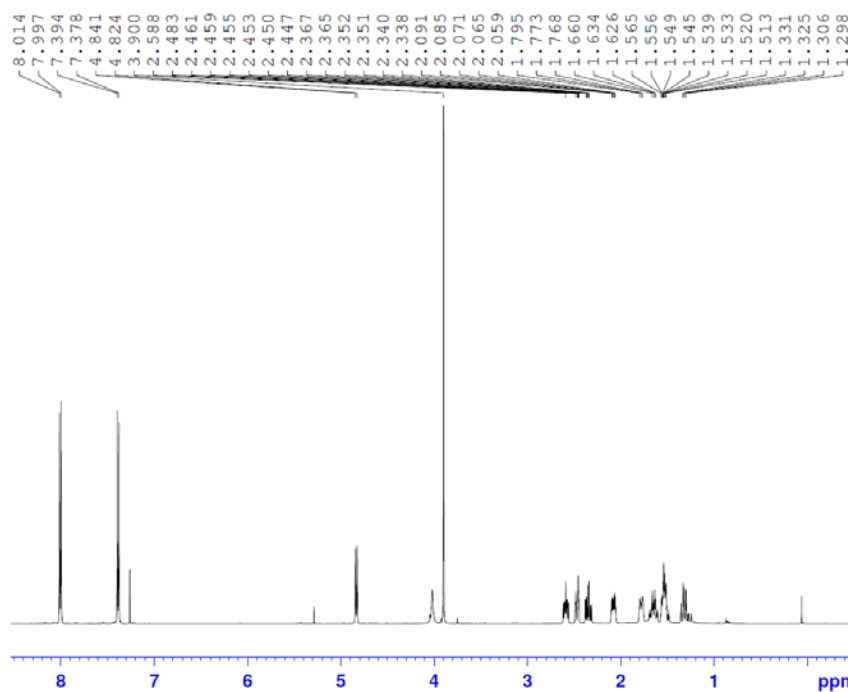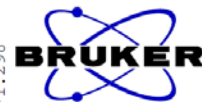

```

NAME      xzh3-110-F
EXPNO     2
PROCNO    1
Date_     20090313
Time      8.16
INSTRUM   spect
PROBHD    5 mm TXI 1H-13
PULPROG   zg30
TD         65536
SOLVENT   CDCl3
NS         16
DS         2
SWH        10330.578 Hz
FIDRES    0.157632 Hz
AQ         3.1720407 sec
RG         64
DW         48.400 usec
DE         7.50 usec
TE         297.0 K
D1         1.00000000 sec
TD0        1
    
```

```

===== CHANNEL f1 =====
NUC1      1H
P1         6.70 usec
PL1        0.00 dB
PL1W      15.07131863 W
SFO1      500.1330885 MHz
SI         32768
SF         500.1300130 MHz
WDW        no
SSB         0
LB         0.00 Hz
GB         0
PC         1.00
    
```

xzh3-110-F-C13

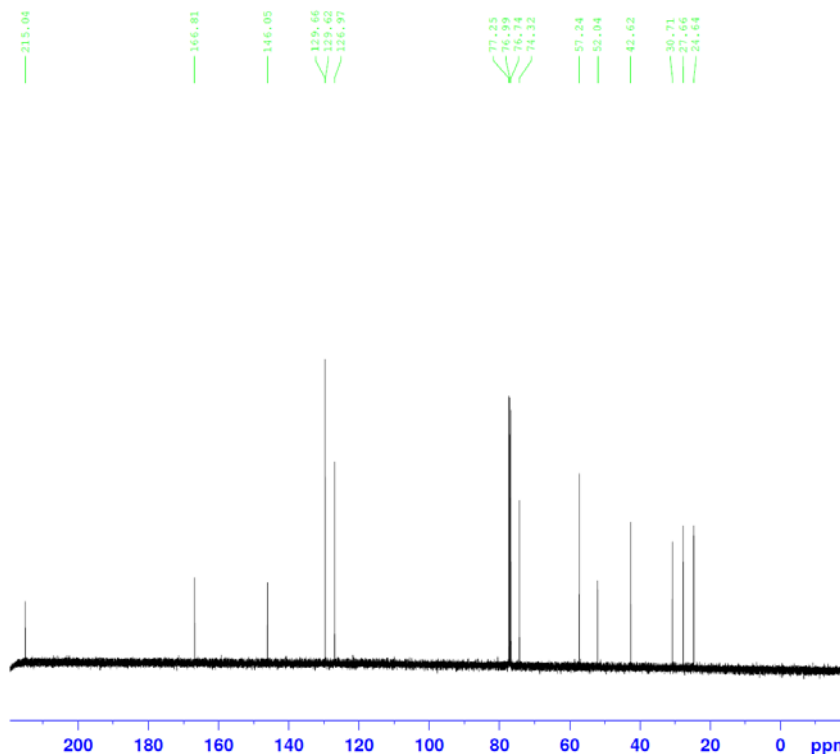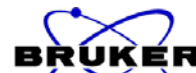

```

NAME      xzh3-110-F-C13
EXPNO     2
PROCNO    1
Date_     20090313
Time      8.49
INSTRUM   spect
PROBHD    5 mm TXI 1H-13
PULPROG   zgpg30
TD         65536
SOLVENT   CDCl3
NS         560
DS         4
SWH        30030.029 Hz
FIDRES    0.458222 Hz
AQ         1.0912410 sec
RG         1024
DW         16.650 usec
DE         7.50 usec
TE         297.0 K
D1         2.00000000 sec
D11        0.03000000 sec
TD0        1
    
```

```

===== CHANNEL f1 =====
NUC1      13C
P1         12.20 usec
PL1        -3.00 dB
PL1W      190.45114136 W
SFO1      125.7703643 MHz

===== CHANNEL f2 =====
CPDPRG2   waltz16
NUC2      1H
PCPD2     100.00 usec
PL2        0.00 dB
PLI2       23.48 dB
PLI3       25.00 dB
PL2W      15.07131863 W
PL12W     0.06763186 W
PL13W     0.04765970 W
SFO2      500.1320005 MHz
SI         32768
SF         125.7577957 MHz
WDW        no
SSB         0
LB         0.00 Hz
GB         0
PC         1.40
    
```

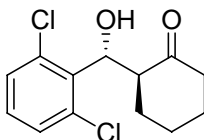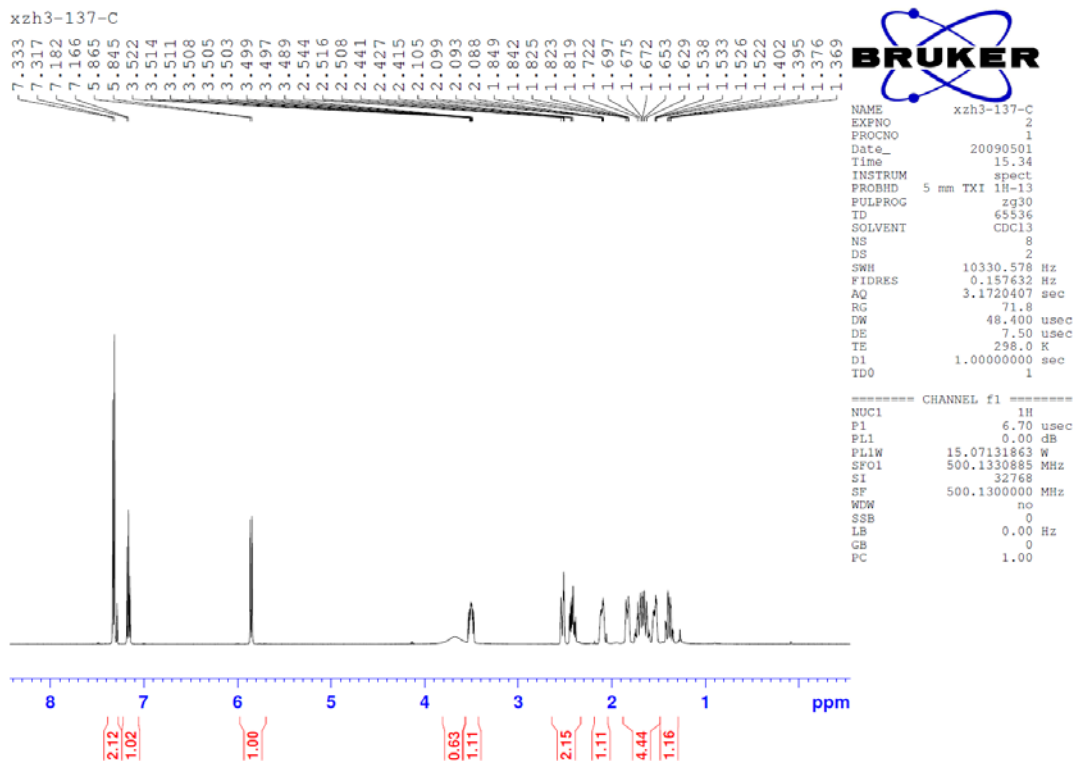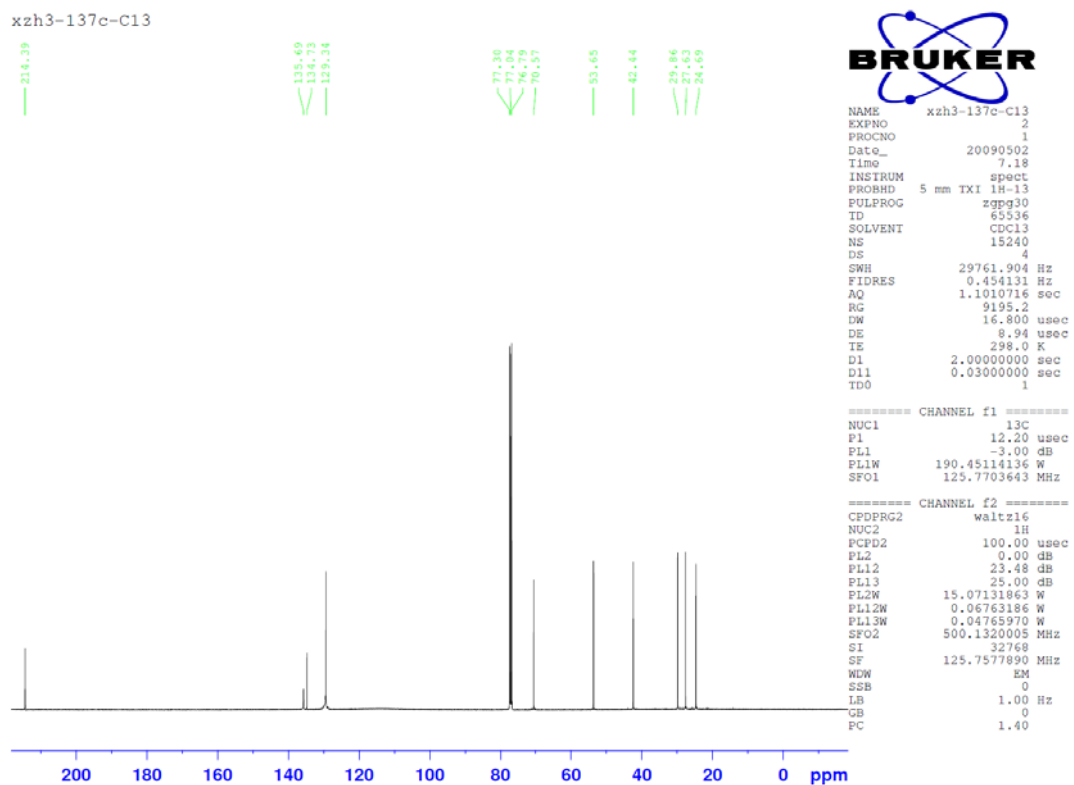

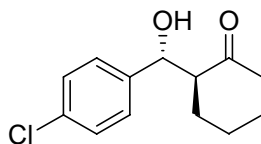

xzh3-110-D

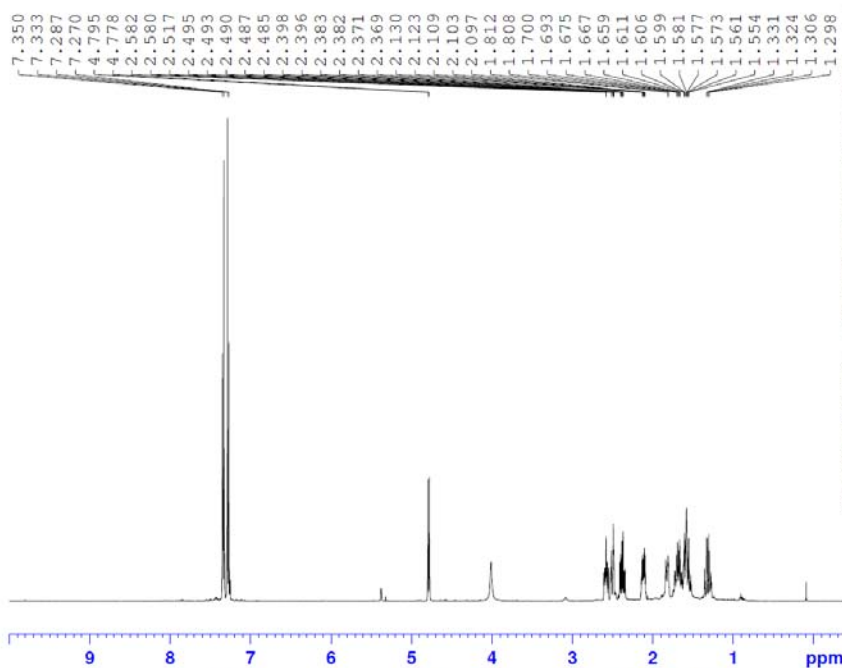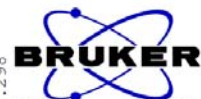

```

NAME      xzh3-110-D
EXPNO    2
PROCNO   1
Date_    20090318
Time     14.10
INSTRUM  spect
PROBHD   5 mm TXI 1H-13
PULPROG  zg30
TD       65536
SOLVENT  CDCl3
NS       14
DS       2
SWH      10330.578 Hz
FIDRES   0.157632 Hz
AQ       3.1720407 sec
RG       128
DW       48.400 usec
DE       7.50 usec
TE       296.3 K
D1       1.00000000 sec
TD0      1

===== CHANNEL f1 =====
NUC1     1H
P1       6.70 usec
PL1      0.00 dB
PL1W     15.07131863 W
SFO1     500.1330885 MHz
SI       32768
SF       500.1300000 MHz
WUW      no
SSB      0
LB       0.00 Hz
GB       0
PC       1.00
    
```

xzh3-110-D-C13

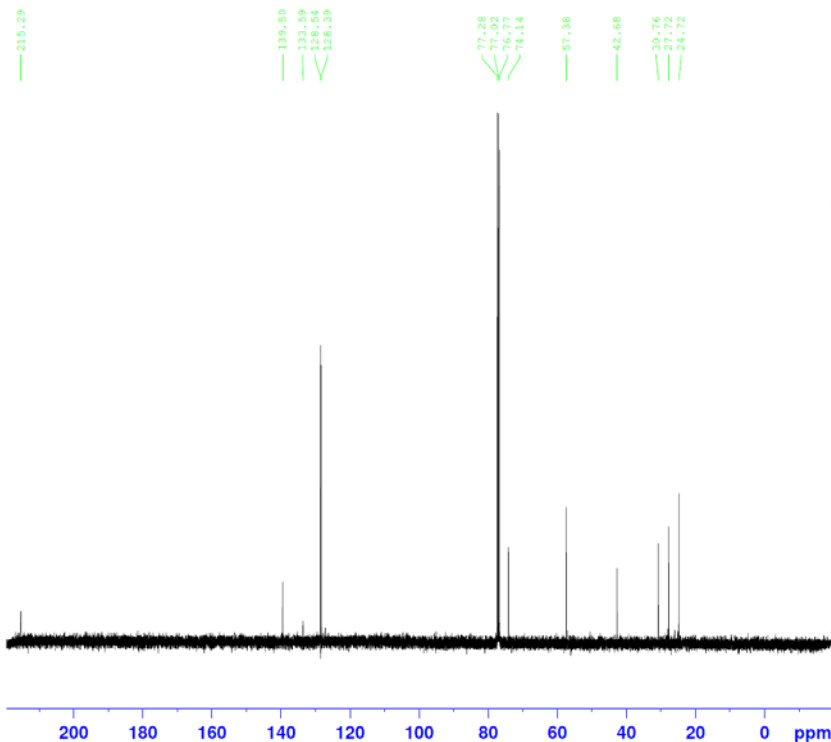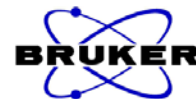

```

NAME      xzh3-110-D-C13
EXPNO    2
PROCNO   1
Date_    20090318
Time     14.57
INSTRUM  spect
PROBHD   5 mm TXI 1H-13
PULPROG  zgpg30
TD       65536
SOLVENT  CDCl3
NS       834
DS       4
SWH      30030.029 Hz
FIDRES   0.458222 Hz
AQ       1.0912410 sec
RG       6502
DW       16.650 usec
DE       7.50 usec
TE       297.2 K
D1       2.00000000 sec
D11      0.03000000 sec
TD0      1

===== CHANNEL f1 =====
NUC1     13C
P1       12.20 usec
PL1      -3.00 dB
PL1W     190.45114136 W
SFO1     125.7703643 MHz

===== CHANNEL f2 =====
CPDPRG2  waltz16
NUC2     1H
PCPD2    100.00 usec
PL2      0.00 dB
PL12     23.48 dB
PL13     25.00 dB
PL2W     15.07131863 W
PL12W    0.06763186 W
PL13W    0.04765970 W
SFO2     500.1320005 MHz
SI       32768
SF       125.7577890 MHz
WUW      no
SSB      0
LB       0.00 Hz
GB       0
PC       1.40
    
```

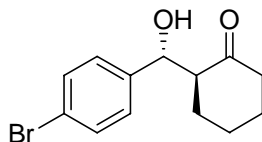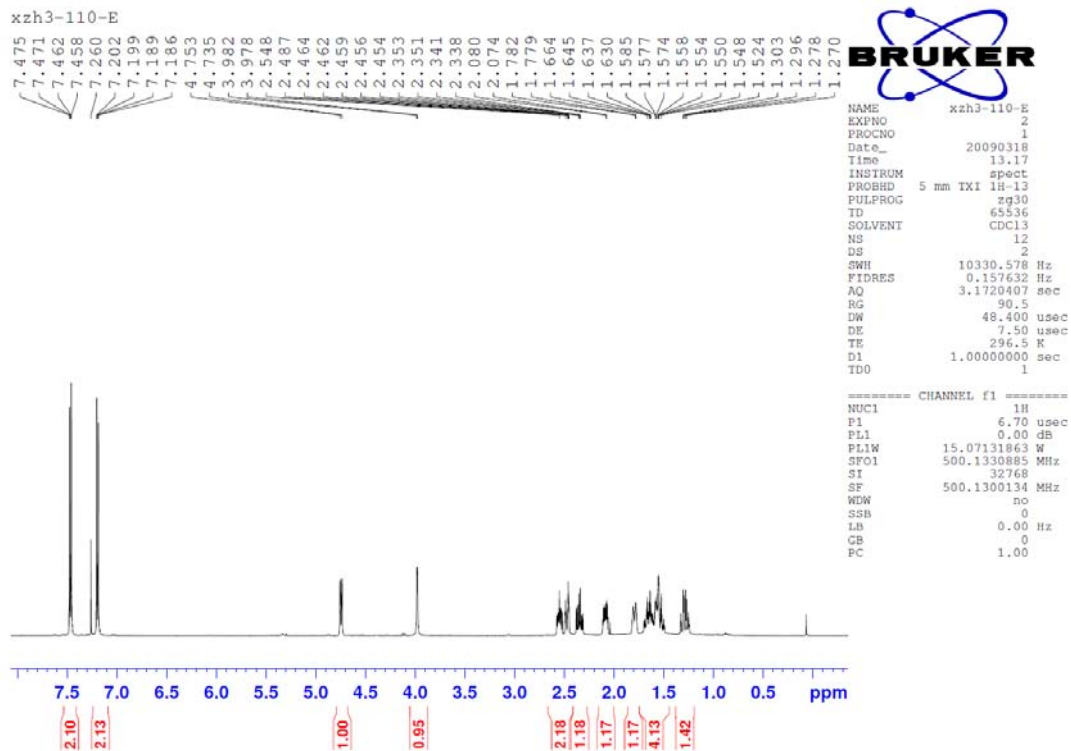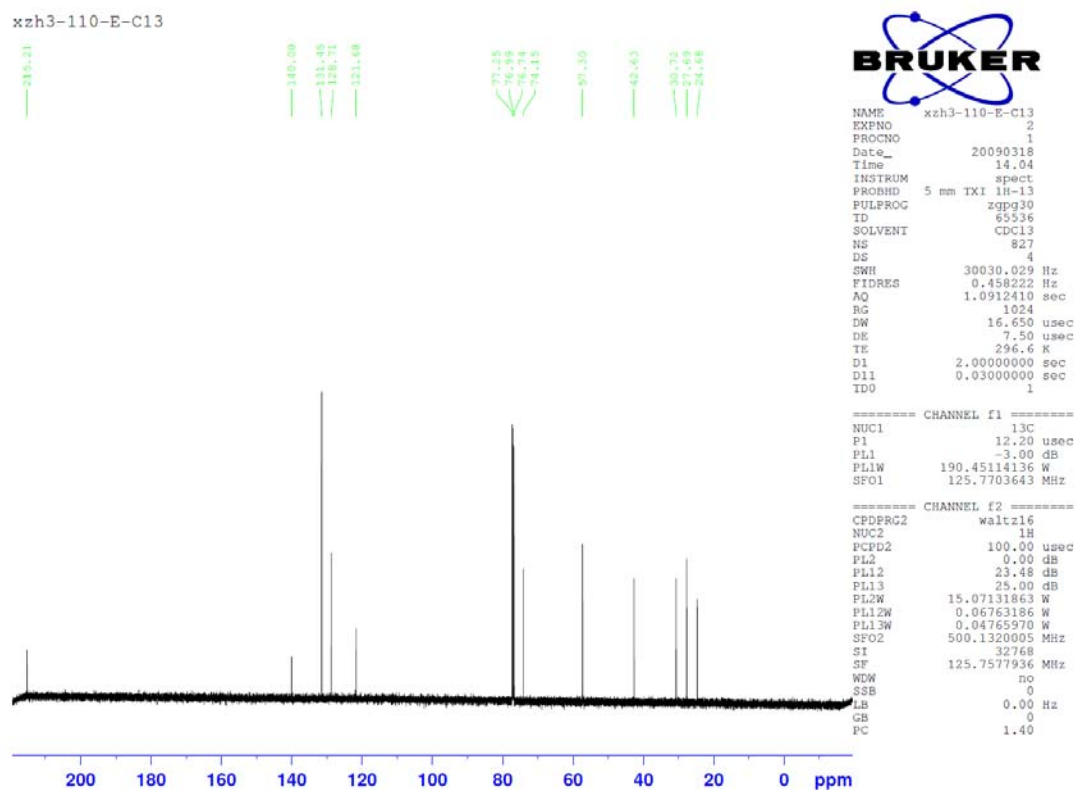

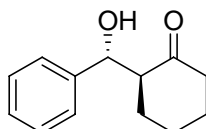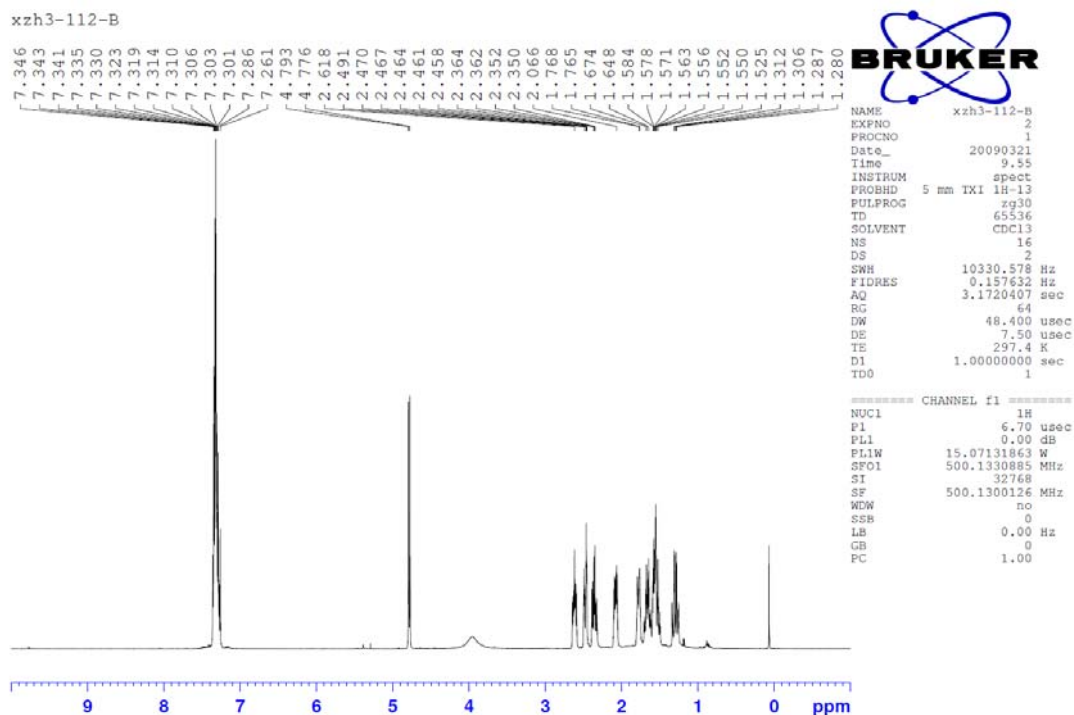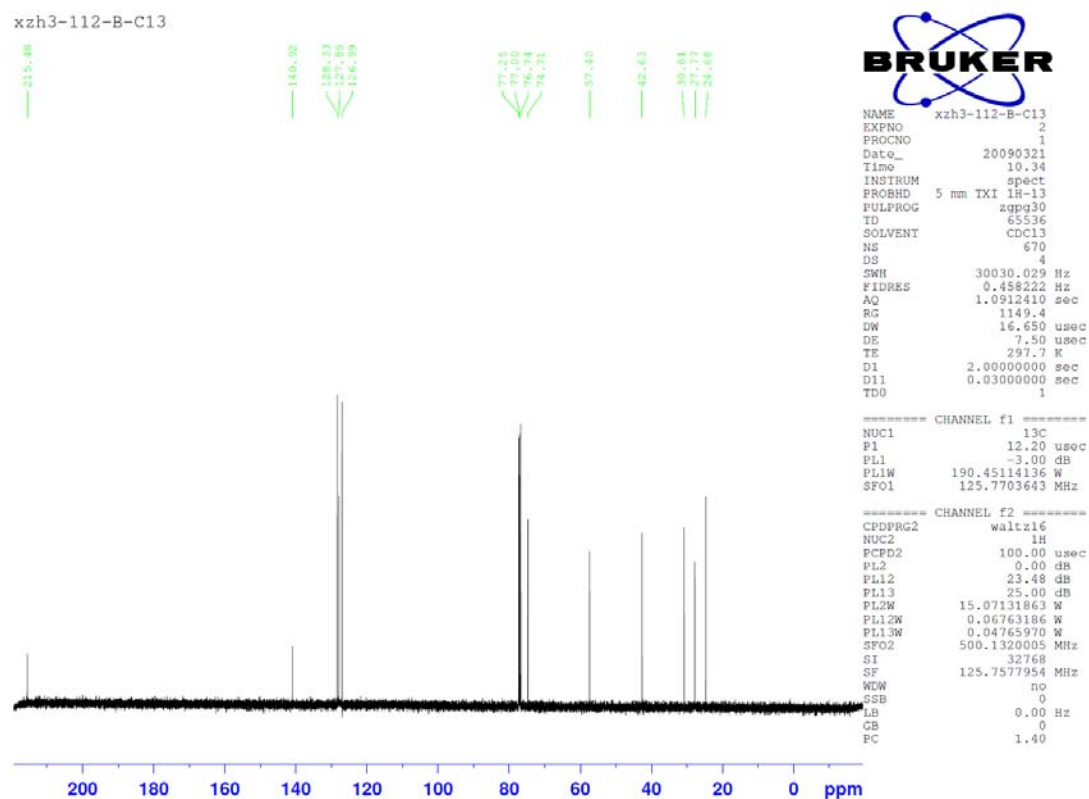



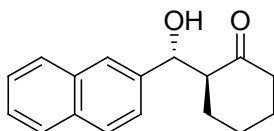

xzh3-112-C

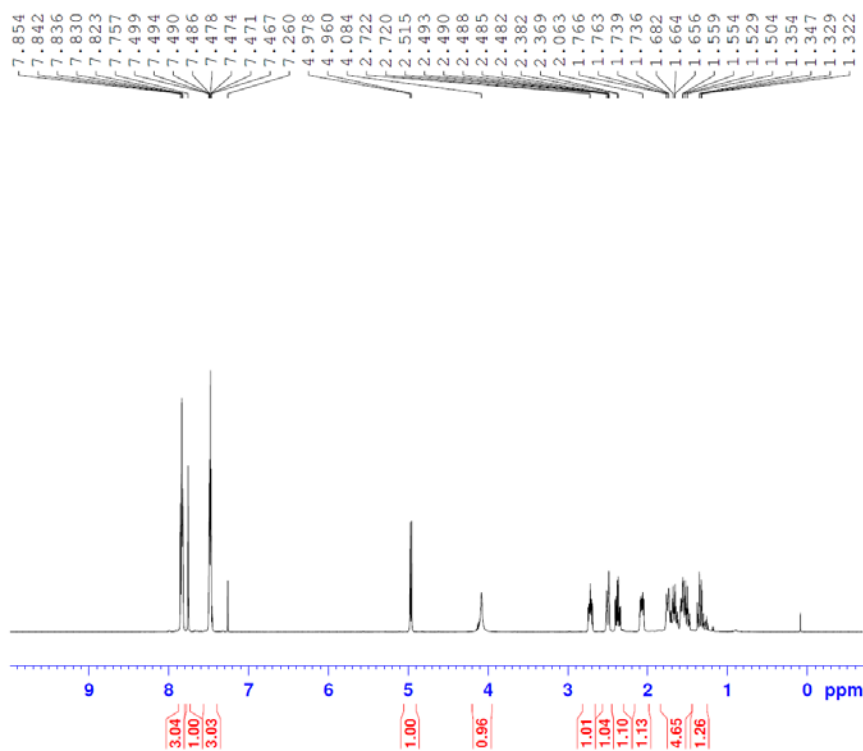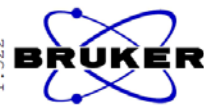

NAME xzh3-112-c  
 EXPNO 2  
 PROCNO 1  
 Date\_ 20090321  
 Time 10.40  
 INSTRUM spect  
 PROBHD 5 mm TXI 1H-13  
 PULPROG zg30  
 TD 65536  
 SOLVENT CDCl3  
 NS 16  
 DS 2  
 SWH 10330.578 Hz  
 FIDRES 0.157632 Hz  
 AQ 3.1720407 sec  
 RG 57  
 DW 48.400 usec  
 DE 7.50 usec  
 TE 297.1 K  
 D1 1.00000000 sec  
 TD0 1

----- CHANNEL f1 -----  
 NUC1 1H  
 P1 6.70 usec  
 PL1 0.00 dB  
 PL1W 15.07131863 W  
 SFO1 500.1330883 MHz  
 SI 32768  
 SF 500.1300130 MHz  
 WDW no  
 SSB 0  
 LB 0.00 Hz  
 GB 0  
 PC 1.00

xzh3-112-c-C13

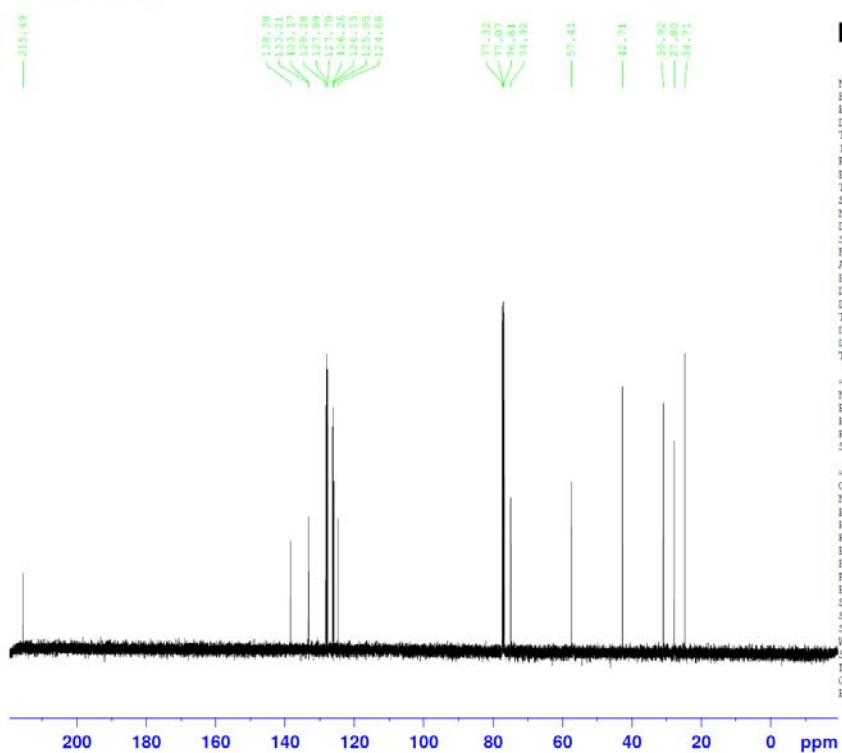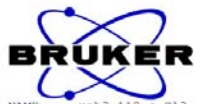

NAME xzh3-112-c-C13  
 EXPNO 2  
 PROCNO 1  
 Date\_ 20090321  
 Time 11.03  
 INSTRUM spect  
 PROBHD 5 mm TXI 1H-13  
 PULPROG zgpg30  
 TD 65536  
 SOLVENT CDCl3  
 NS 376  
 DS 4  
 SWH 30030.029 Hz  
 FIDRES 0.458222 Hz  
 AQ 1.0912410 sec  
 RG 1149.4  
 DW 16.650 usec  
 DE 7.50 usec  
 TE 298.0 K  
 D1 2.00000000 sec  
 D11 0.03000000 sec  
 TD0 1

----- CHANNEL f1 -----  
 NUC1 13C  
 P1 12.20 usec  
 PL1 -3.00 dB  
 PL1W 190.45114136 W  
 SFO1 125.7703643 MHz

----- CHANNEL f2 -----  
 CPDPRG2 waltz16  
 NUC2 1H  
 PCPD2 100.00 usec  
 PL2 0.00 dB  
 PL12 23.48 dB  
 PL13 25.00 dB  
 PL2W 15.07131863 W  
 PL12W 0.06763186 W  
 PL13W 0.04765970 W  
 SFO2 500.1320005 MHz  
 SI 32768  
 SF 125.7577890 MHz  
 WDW no  
 SSB 0  
 LB 0.00 Hz  
 GB 0  
 PC 1.40

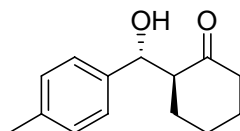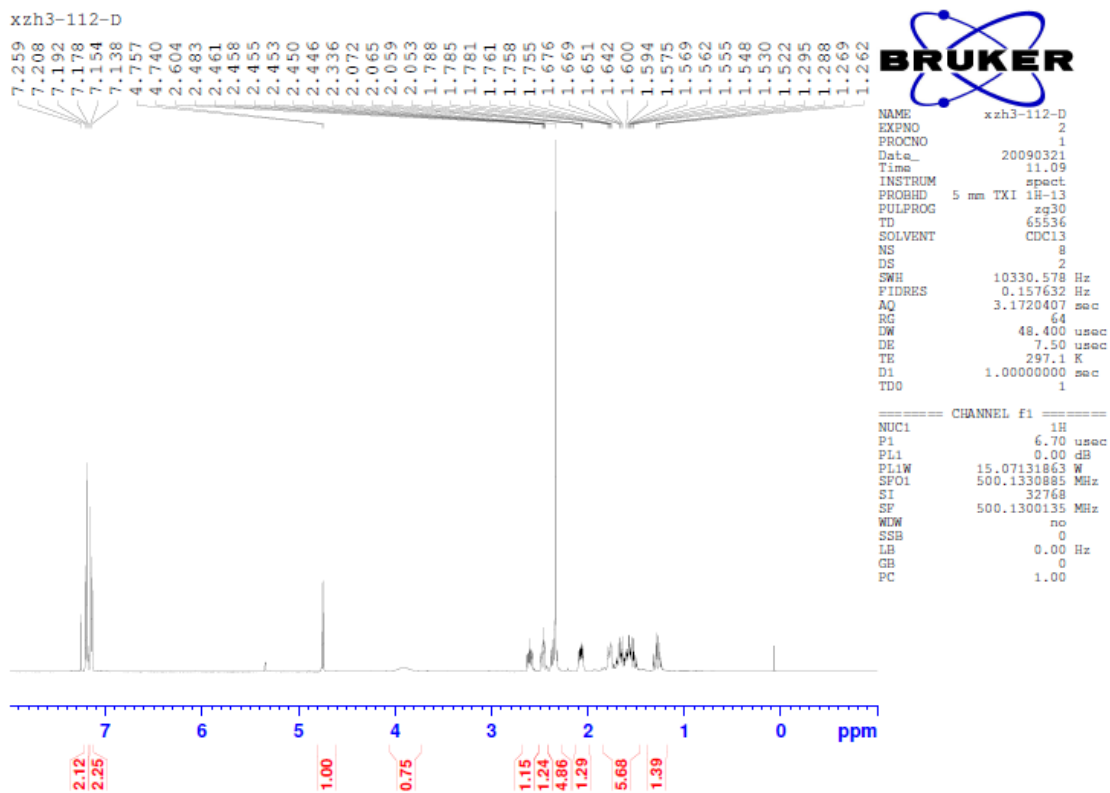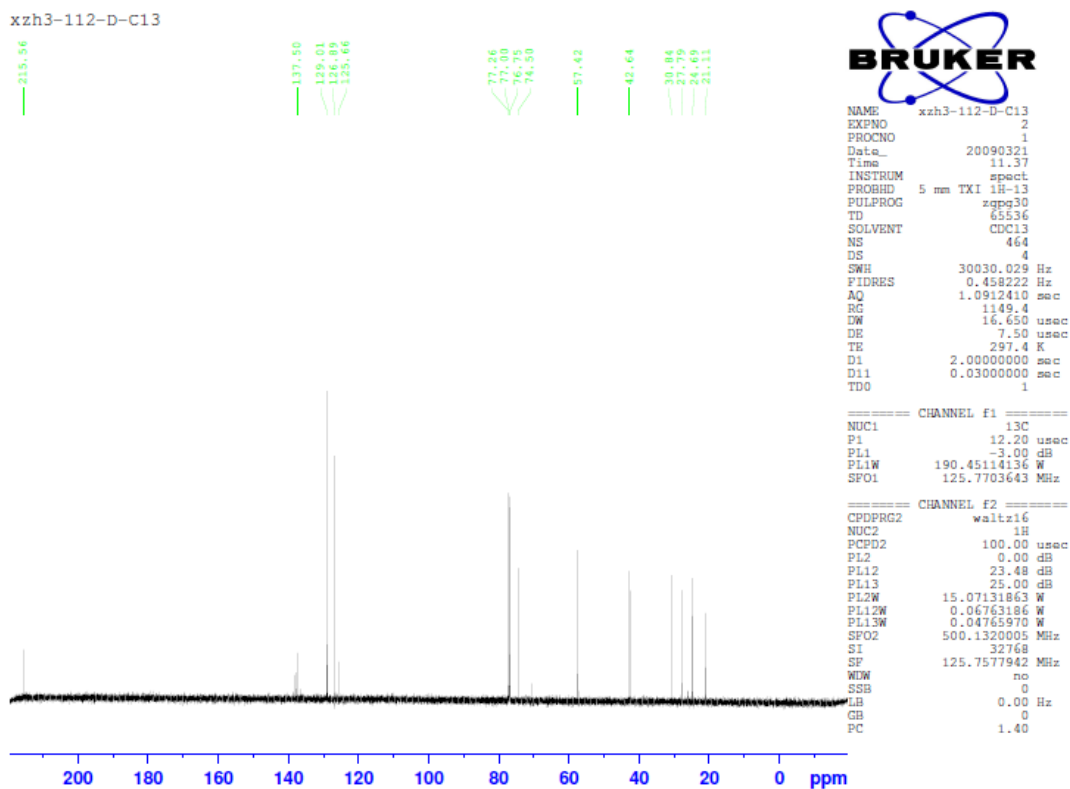

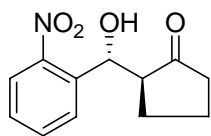

anti/syn = 3/1

xzh3-11A

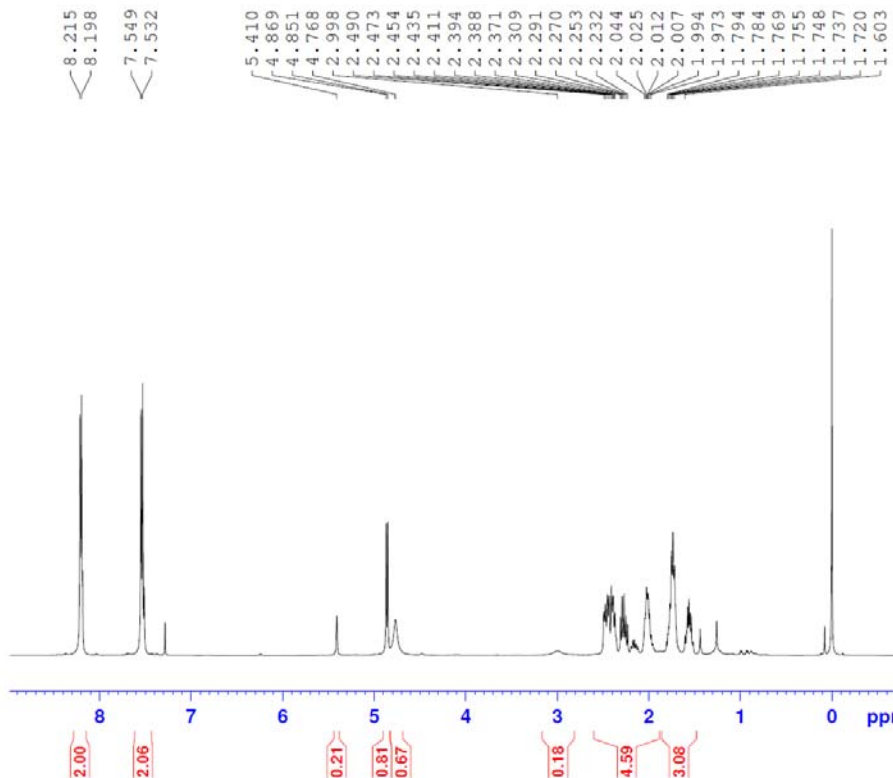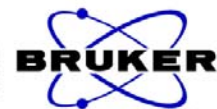

```

NAME          xzh3-11A
EXPNO         1
PROCNO        1
Date_         20081119
Time          17.33
INSTRUM       spect
PROBHD        5 mm TXI 1H-13
PULPROG       zg30
ID            65536
SOLVENT       CDCl3
NS            16
DS            2
SWH           10330.578 Hz
FIDRES        0.157632 Hz
AQ            3.1720407 sec
RG            40.3
DW            48.400 usec
DE            7.50 usec
TE            298.3 K
D1            1.0000000 sec
TD0           1

----- CHANNEL f1 -----
NUC1          1H
P1            6.70 usec
PL1           0.00 dB
PL1W          15.07131863 W
SFO1          500.1330885 MHz
SI            32768
SF            500.1300000 MHz
WDW           EM
SSB           0
LB            0.30 Hz
GB            0
PC            1.00
    
```

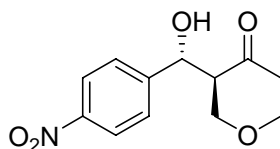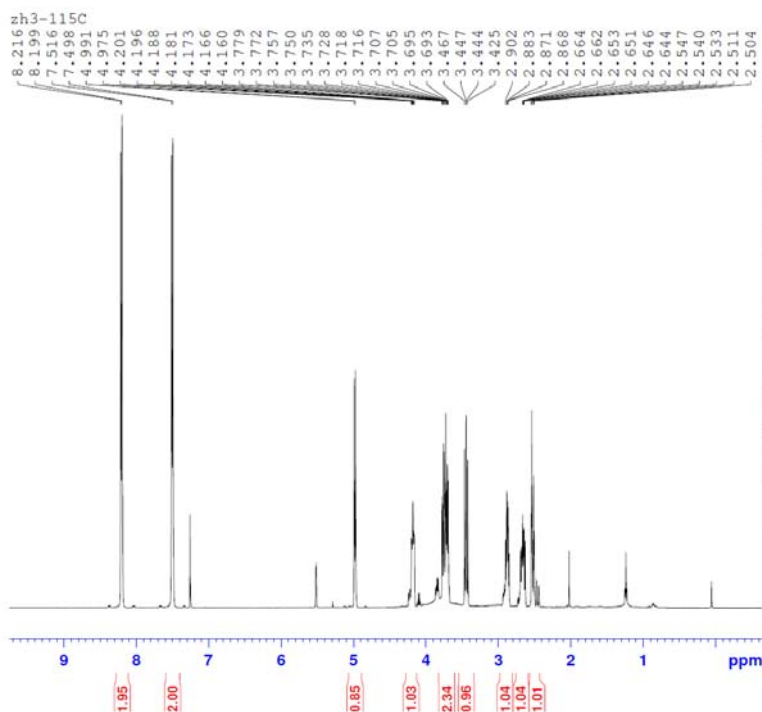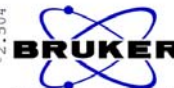

```

NAME      xzh3-115C
EXPNO    2
PROCNO   1
Date_    20090327
Time     8.17
INSTRUM  spect
PROBHD   5 mm TXI 1H-13
PULPROG  zg30
TD       65536
SOLVENT  CDCl3
NS       16
DS       2
SWH      10330.578 Hz
FIDRES   0.157632 Hz
AQ       3.1720407 sec
RG       71.8
DW       48.400 usec
DE       7.50 usec
TE       296.6 K
D1       1.00000000 sec
TD0      1
    
```

```

===== CHANNEL f1 =====
NUC1     1H
P1       6.70 usec
PL1      0.00 dB
PL1W     15.07131863 W
SFO1     500.1330885 MHz
SI       32768
SF       500.1300134 MHz
WDW      no
SSB      0
LB       0.00 Hz
GB       0
PC       1.00
    
```

xzh3-115C-C13

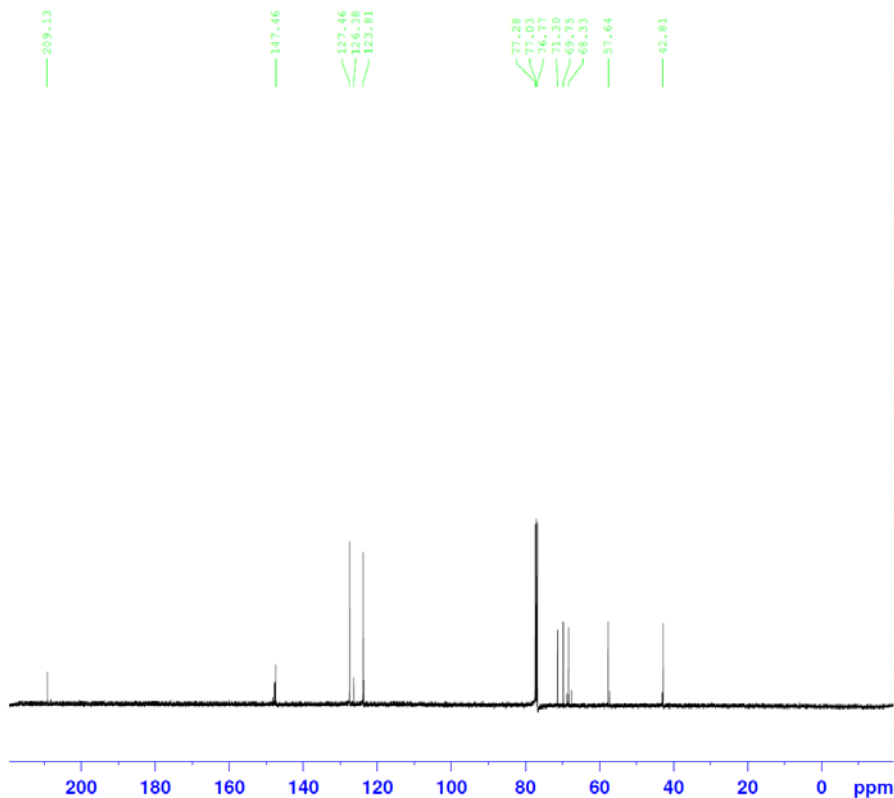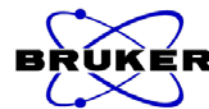

```

NAME      xzh3-115C-C13
EXPNO    2
PROCNO   1
Date_    20090327
Time     8.45
INSTRUM  spect
PROBHD   5 mm TXI 1H-13
PULPROG  zgpg30
TD       65536
SOLVENT  CDCl3
NS       588
DS       4
SWH      30030.029 Hz
FIDRES   0.458222 Hz
AQ       1.0912410 sec
RG       8192
DW       16.650 usec
DE       7.50 usec
TE       296.9 K
D1       2.00000000 sec
D11      0.03000000 sec
TD0      1
    
```

```

===== CHANNEL f1 =====
NUC1     13C
P1       12.20 usec
PL1      -3.00 dB
PL1W     190.45114136 W
SFO1     125.7703643 MHz
    
```

```

===== CHANNEL f2 =====
CPDPRG2  waltz16
NUC2     1H
PCPD2    100.00 usec
PL2      0.00 dB
PL12     23.48 dB
PL13     25.00 dB
PL2W     15.07131863 W
PL12W    0.06763186 W
PL13W    0.04765970 W
SFO2     500.1320005 MHz
SI       32768
SF       125.7577927 MHz
WDW      EM
SSB      0
LB       1.00 Hz
GB       0
PC       1.40
    
```

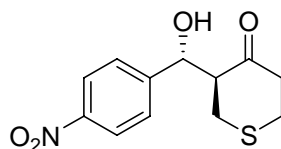

xzh3-115-D

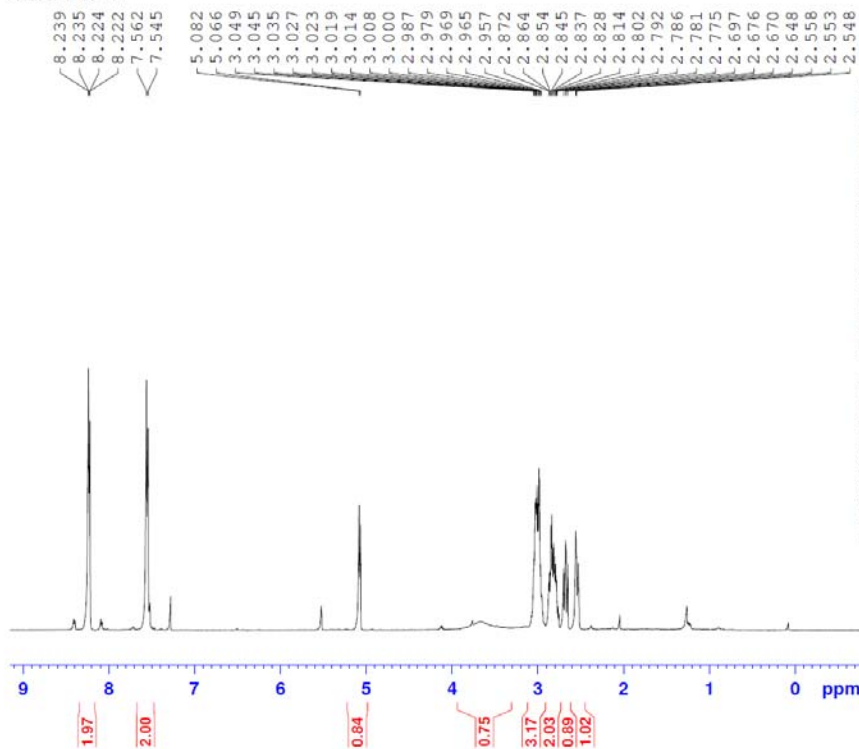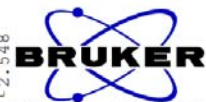

```

NAME      xzh3-115-D
EXPNO    2
PROCNO   1
Date_    20090328
Time     11.36
INSTRUM  spect
PROBHD   5 mm TXI 1H-13
PULPROG  zg30
ID       65536
SOLVENT  CDCl3
NS       15
DS       2
SWH      10330.578 Hz
FIDRES   0.157632 Hz
AQ       3.1720407 sec
RG       71.8
DW       48.400 usec
DE       7.50 usec
TE       297.8 K
D1       1.00000000 sec
TD0     1

===== CHANNEL f1 =====
NUC1     1H
P1       6.70 usec
PL1     -0.00 dB
PL1W    15.07131863 W
SF01    500.1330885 MHz
SI       32768
SF       500.1330000 MHz
WDW      no
SSB      0
LB       0.00 Hz
GB       0
PC       1.00
    
```

xzh3-115-D--C13

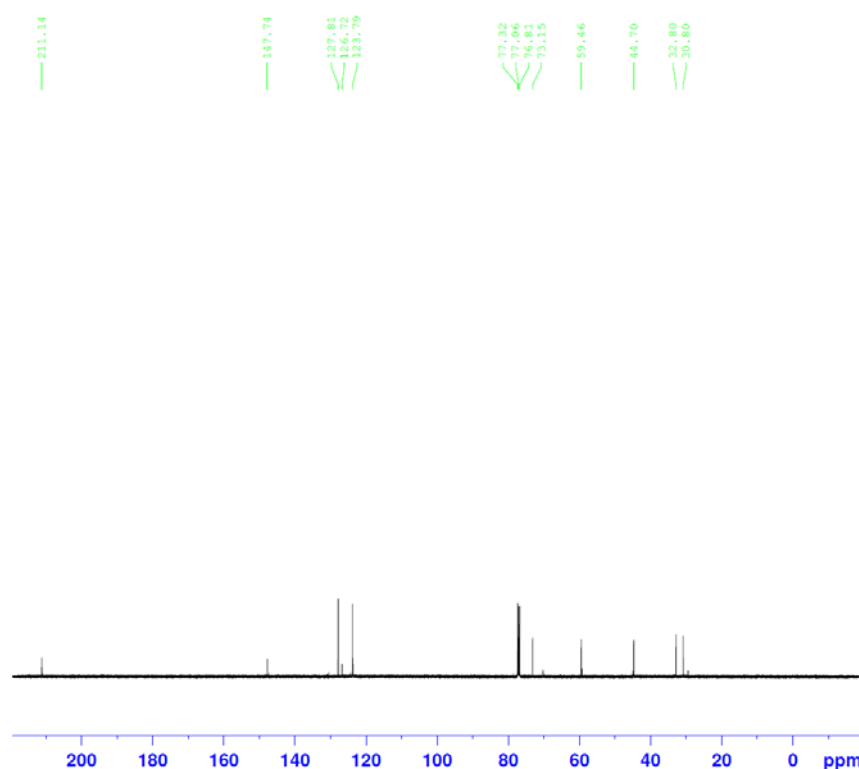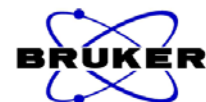

```

NAME      xzh3-115-D--C13
EXPNO    2
PROCNO   1
Date_    20090328
Time     12.37
INSTRUM  spect
PROBHD   5 mm TXI 1H-13
PULPROG  zgpg30
ID       65536
SOLVENT  CDCl3
NS       1024
DS       4
SWH      30030.029 Hz
FIDRES   0.458222 Hz
AQ       1.0912410 sec
RG       13004
DW       16.650 usec
DE       7.50 usec
TE       298.6 K
D1       2.00000000 sec
D11     0.03000000 sec
TD0     1

===== CHANNEL f1 =====
NUC1     13C
P1       12.20 usec
PL1     -3.00 dB
PL1W    190.45114136 W
SF01    125.7703643 MHz

===== CHANNEL f2 =====
CPDPRG2  waltz16
NUC2     1H
FCPD2   100.00 usec
PL2     0.00 dB
PL12    23.48 dB
PL13    25.00 dB
PL2W    15.07131863 W
PL12W   0.06763186 W
PL13W   0.04765970 W
SFO2    500.1320005 MHz
SI       32768
SF       125.7577890 MHz
WDW      no
SSB      0
LB       0.00 Hz
GB       0
PC       1.40
    
```

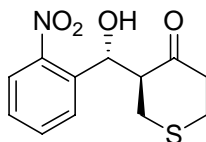

xzh3-150A-anti  
 7.892  
 7.780  
 7.764  
 7.681  
 7.668  
 7.651  
 7.477  
 7.462  
 7.446  
 7.260

5.559  
 5.545  
 3.184  
 3.172  
 3.162  
 3.149  
 3.139  
 3.014  
 2.998  
 2.990  
 2.987  
 2.963  
 2.955  
 2.950  
 2.940  
 2.831  
 2.812  
 2.804  
 2.796  
 2.787  
 2.776  
 2.764  
 2.754  
 2.641  
 2.633  
 2.628  
 2.614  
 2.606

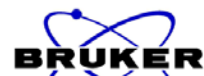

```

NAME      xzh3-150A-anti
EXPNO     2
PROCNO    1
Date_     20090512
Time      11.13
INSTRUM   spect
PROBHD    5 mm TXI 1H-13
PULPROG   zg30
TD         65536
SOLVENT   CDCl3
NS         16
DS         2
SWH       10330.578 Hz
FIDRES    0.157632 Hz
AQ         3.1720407 sec
RG         128
DW         48.400 usec
DE         7.50 usec
TE         296.2 K
D1         1.00000000 sec
TD0        1
    
```

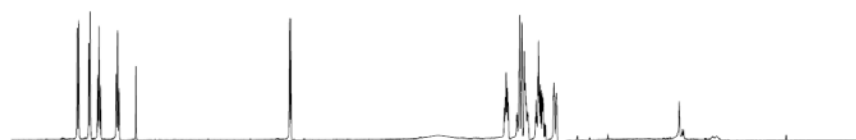

1.02  
 1.04  
 1.04  
 1.04  
 1.00  
 0.84  
 1.09  
 3.17  
 2.01  
 0.96

```

===== CHANNEL f1 =====
NUC1      1H
P1         6.70 usec
PL1        0.00 dB
PL1W      15.07131863 W
SFO1      500.1330895 MHz
SI         32768
SF         500.1300137 MHz
WDW        no
SGB         0
LB         0.00 Hz
GB         0
PC         1.00
    
```

xzh3-150A-anti-C13

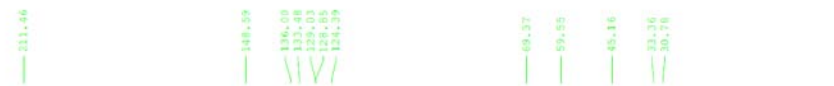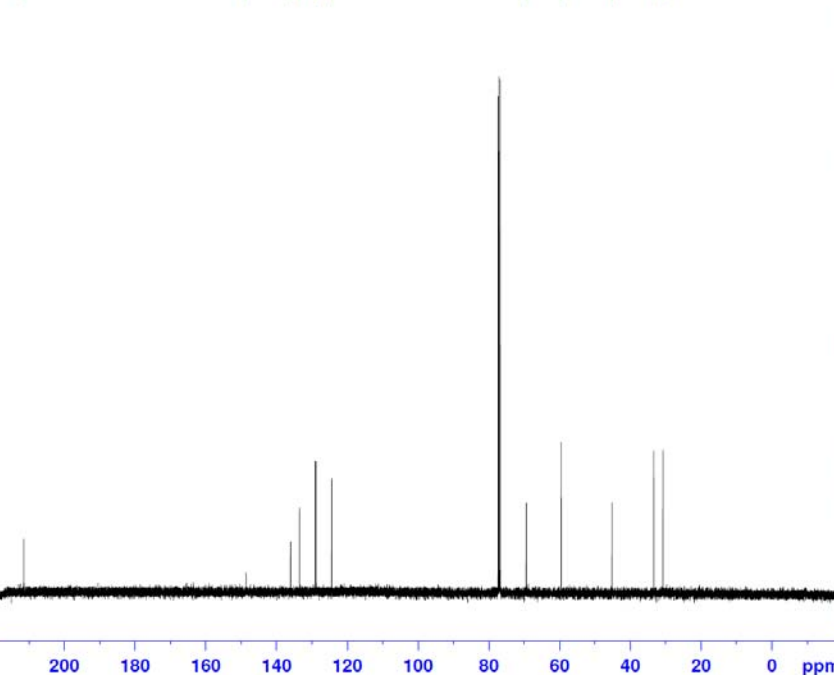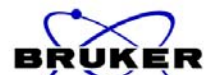

```

NAME      xzh3-150A-anti-C13
EXPNO     2
PROCNO    1
Date_     20090512
Time      12.20
INSTRUM   spect
PROBHD    5 mm TXI 1H-13
PULPROG   zgpg30
TD         65536
SOLVENT   CDCl3
NS         1195
DS         4
SWH       30030.029 Hz
FIDRES    0.458222 Hz
AQ         1.0912410 sec
RG         1290.2
DW         16.650 usec
DE         7.50 usec
TE         296.2 K
D1         2.00000000 sec
D11        0.03000000 sec
TD0        1
    
```

```

===== CHANNEL f1 =====
NUC1      13C
P1         12.20 usec
PL1        -3.00 dB
PL1W      190.45114136 W
SFO1      125.7703643 MHz
    
```

```

===== CHANNEL f2 =====
CPDPRG2   waltz16
NUC2      1H
PCPD2     100.00 usec
PL2        0.00 dB
PL12       23.48 dB
PL13       25.00 dB
PL2W      15.07131863 W
PL12W     0.06763186 W
PL13W     0.04765970 W
SFO2      500.1320005 MHz
SI         32768
SF         125.7577890 MHz
WDW        no
SGB         0
LB         0.00 Hz
GB         0
PC         1.40
    
```

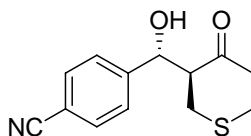

xzh3-150B-H

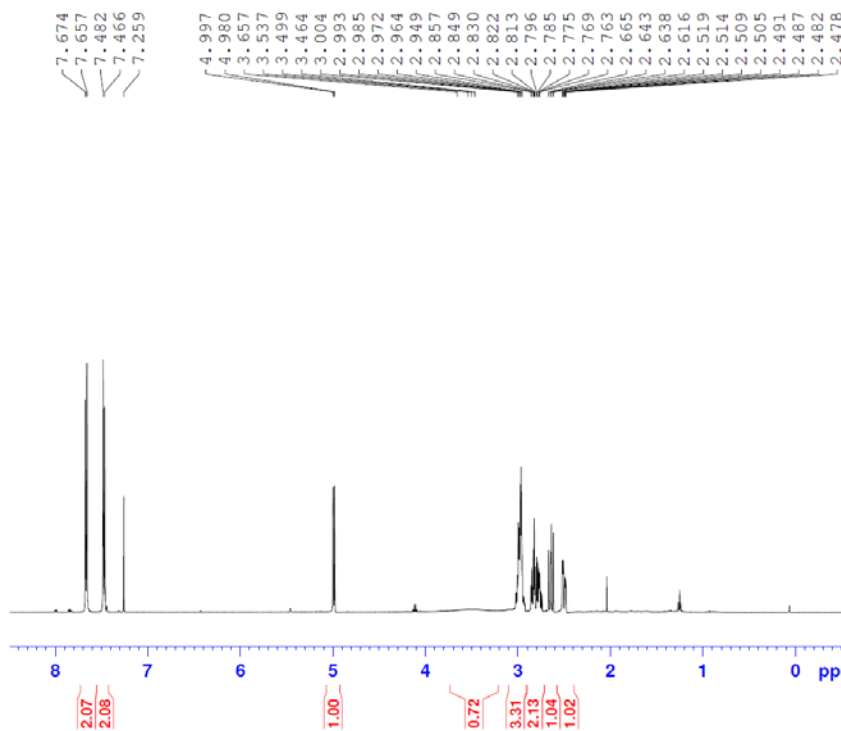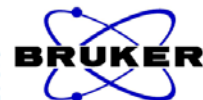

```

NAME      xzh3-150B-H
EXPNO     2
PROCNO    1
Date_     20090512
Time      12.26
INSTRUM   spect
PROBHD    5 mm TXI 1H-13
PULPROG   zg30
TD        65536
SOLVENT   CDCl3
NS        8
DS        2
SWH       10330.578 Hz
FIDRES    0.157632 Hz
AQ        3.1720407 sec
RG        161.3
DW        48.400 usec
DE        7.50 usec
TE        296.4 K
D1        1.0000000 sec
TD0       1
    
```

```

===== CHANNEL f1 =====
NUC1      1H
P1        6.70 usec
PL1       0.00 dB
PL1W      15.07131863 W
SFO1      500.1330885 MHz
SI        32768
SF        500.1300136 MHz
WDW       no
SSB       0
LB        0.00 Hz
GB        0
PC        1.00
    
```

xzh3-150B-c13

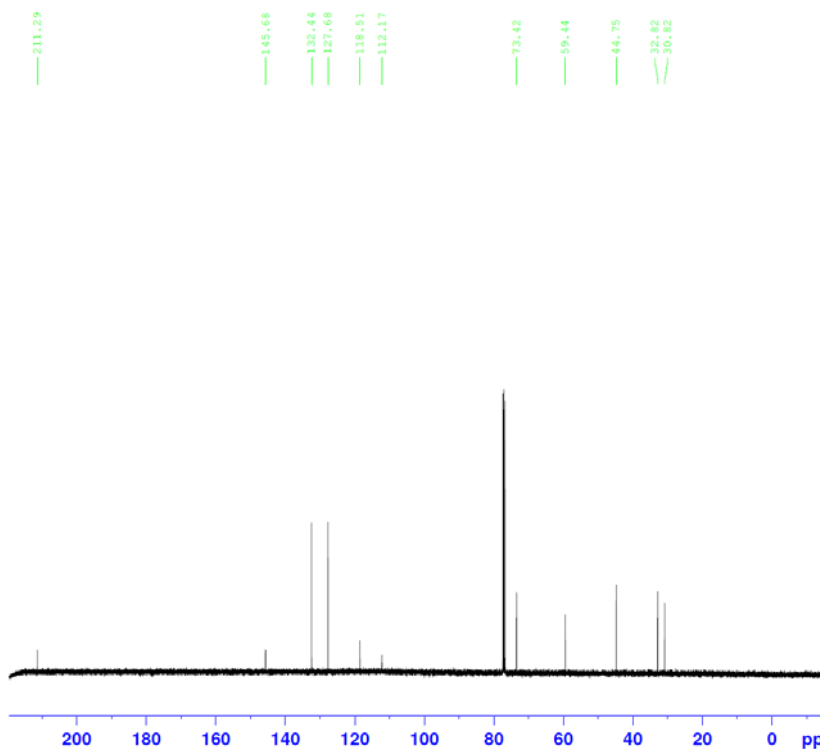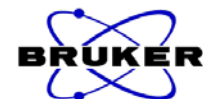

```

NAME      xzh3-150B-c13
EXPNO     2
PROCNO    1
Date_     20090512
Time      14.00
INSTRUM   spect
PROBHD    5 mm TXI 1H-13
PULPROG   zgpg30
TD        65536
SOLVENT   CDCl3
NS        1698
DS        4
SWH       30030.029 Hz
FIDRES    0.458222 Hz
AQ        1.0912410 sec
RG        812.7
DW        16.650 usec
DE        7.50 usec
TE        296.4 K
D1        2.0000000 sec
D11       0.0300000 sec
TD0       1
    
```

```

===== CHANNEL f1 =====
NUC1      13C
P1        12.20 usec
PL1       -3.00 dB
PL1W      190.45114136 W
SFO1      125.7703643 MHz

===== CHANNEL f2 =====
CPDPRG2   waltz16
NUC2      1H
PCPD2     100.00 usec
PL2       0.00 dB
PL12     23.48 dB
PL13     25.00 dB
PL2W     15.07131863 W
PL12W    0.06763186 W
PL13W    0.04765970 W
SFO2     500.1320005 MHz
SI        32768
SF        125.7577890 MHz
WDW       no
SSB       0
LB        0.00 Hz
GB        0
PC        1.40
    
```

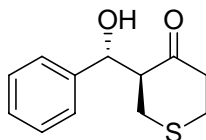

xzh3-150c-H

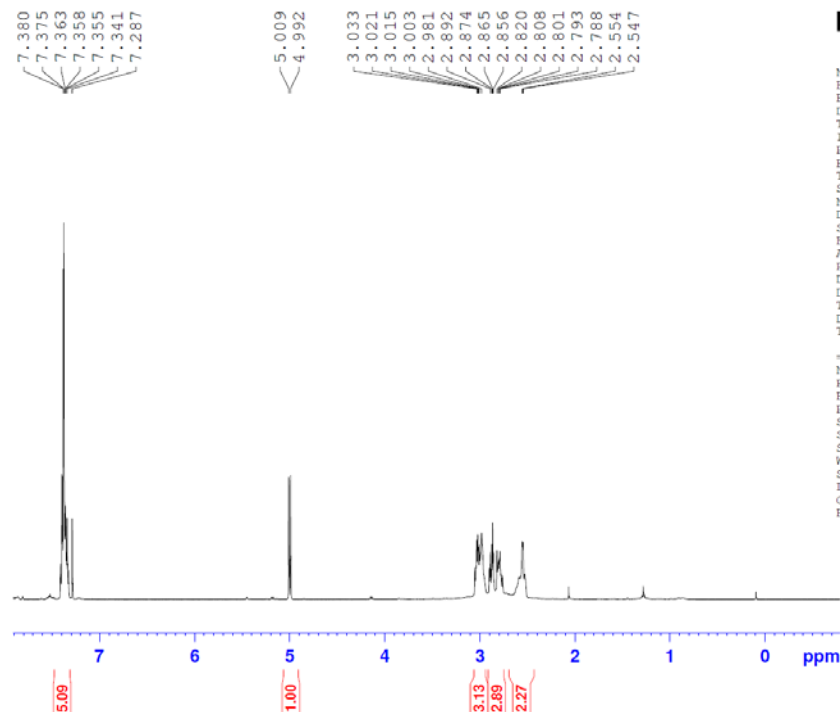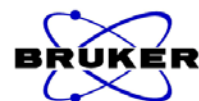

```

NAME      xzh3-150c-H
EXPNO     2
PROCNO    1
Date_     20090514
Time      13.30
INSTRUM   spect
PROBHD    5 mm TXI 1H-13
PULPROG   zg30
TD         65536
SOLVENT   CDCl3
NS         8
DS         2
SWH       10330.578 Hz
FIDRES    0.157632 Hz
AQ         3.1720407 sec
RG         90.5
DW         48.400 usec
DE         7.50 usec
TE         296.6 K
D1         1.00000000 sec
TD0        1

===== CHANNEL f1 =====
NUC1      1H
P1         6.70 usec
PL1        0.00 dB
PL1W      15.07131863 W
SFO1      500.1330885 MHz
SI         32768
SF         500.1300000 MHz
WDW        no
SSB        0
LB         0.00 Hz
GB         0
PC         1.00
    
```

xzh3-150c-C13

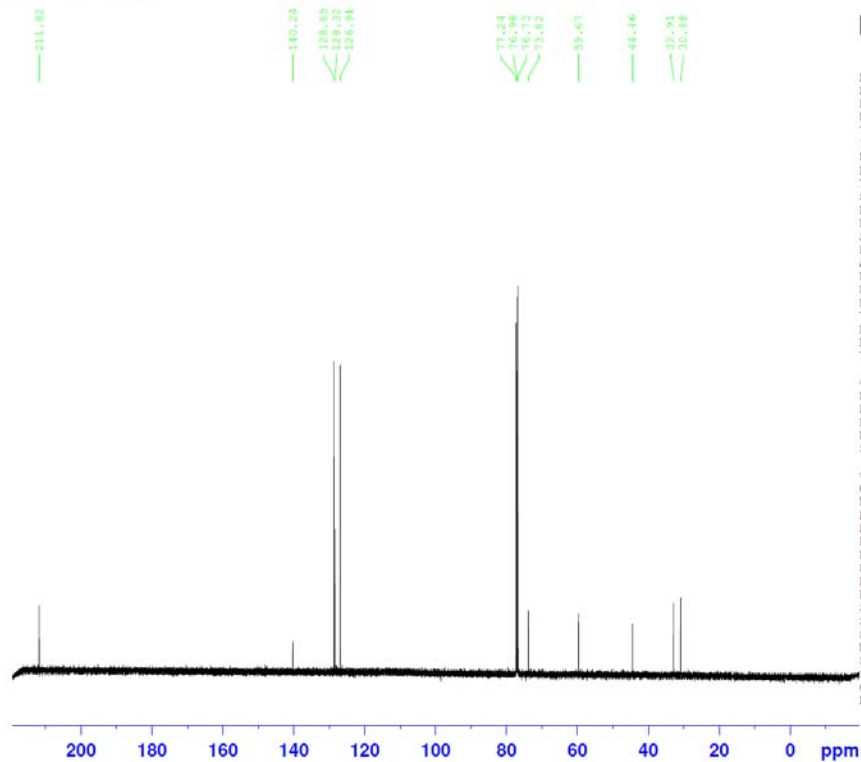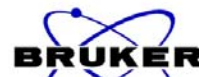

```

NAME      xzh3-150c-C13
EXPNO     2
PROCNO    1
Date_     20090514
Time      14.48
INSTRUM   spect
PROBHD    5 mm TXI 1H-13
PULPROG   zgpg30
TD         65536
SOLVENT   CDCl3
NS         1395
DS         4
SWH       30030.029 Hz
FIDRES    0.458222 Hz
AQ         1.0912410 sec
RG         812.7
DW         16.650 usec
DE         7.50 usec
TE         297.2 K
D1         2.00000000 sec
D11        0.03000000 sec
TD0        1

===== CHANNEL f1 =====
NUC1      13C
P1         12.20 usec
PL1        -3.00 dB
PL1W      190.45114136 W
SFO1      125.7703643 MHz

===== CHANNEL f2 =====
CPDPRG2   waltz16
NUC2      1H
PCPD2     100.00 usec
PL2        0.00 dB
PL12      23.48 dB
PL13      25.00 dB
PL2W      15.07131863 W
PL12W     0.06763186 W
PL13W     0.04765970 W
SFO2      500.1320005 MHz
SI         32768
SF         125.7577966 MHz
WDW        no
SSB        0
LB         0.00 Hz
GB         0
PC         1.40
    
```



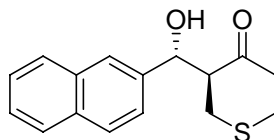

XZH3-150-d-h

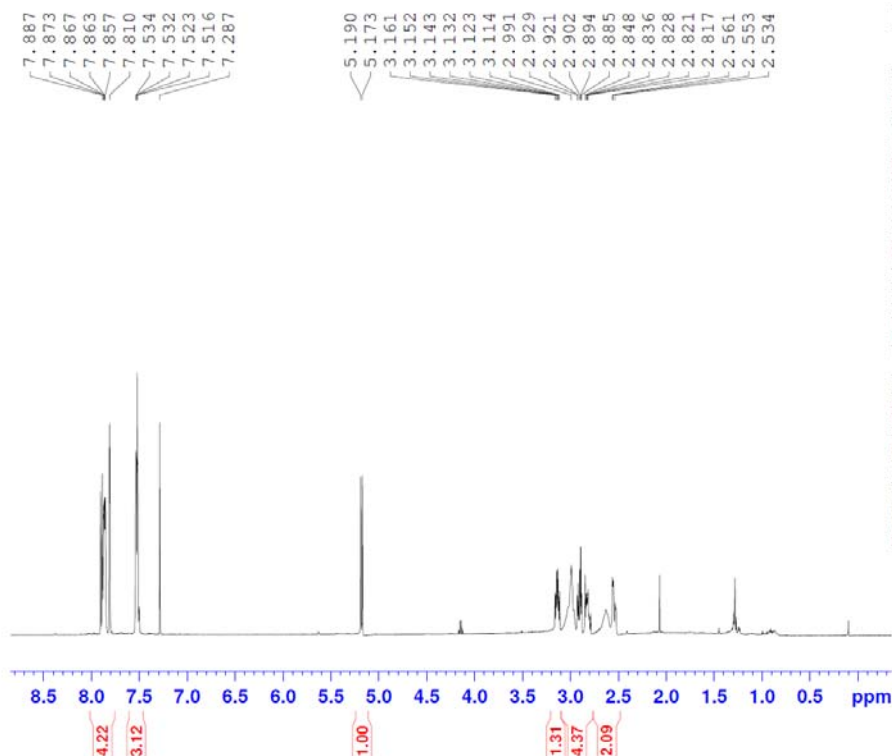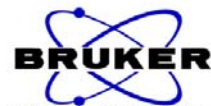

```
NAME XZH3-150-d-h
EXPNO 2
PROCNO 1
Date_ 20090514
Time 15.35
INSTRUM spect
PROBHD 5 mm TXI 1H-13
PULPROG zg30
TD 65536
SOLVENT CDCl3
NS 16
DS 2
SWH 10330.578 Hz
FIDRES 0.157632 Hz
AQ 3.1720407 sec
RG 161.3
DW 48.400 usec
DE 7.50 usec
TE 296.3 K
D1 1.00000000 sec
TD0 1
```

```
===== CHANNEL f1 =====
NUC1 1H
P1 6.70 usec
PL1 0.00 dB
PLW 15.07131863 W
SFO1 500.1330885 MHz
SI 32768
SF 500.1300000 MHz
WDW no
SSB 0
LB 0.00 Hz
GB 0
PC 1.00
```

XZH3-150-d-C13

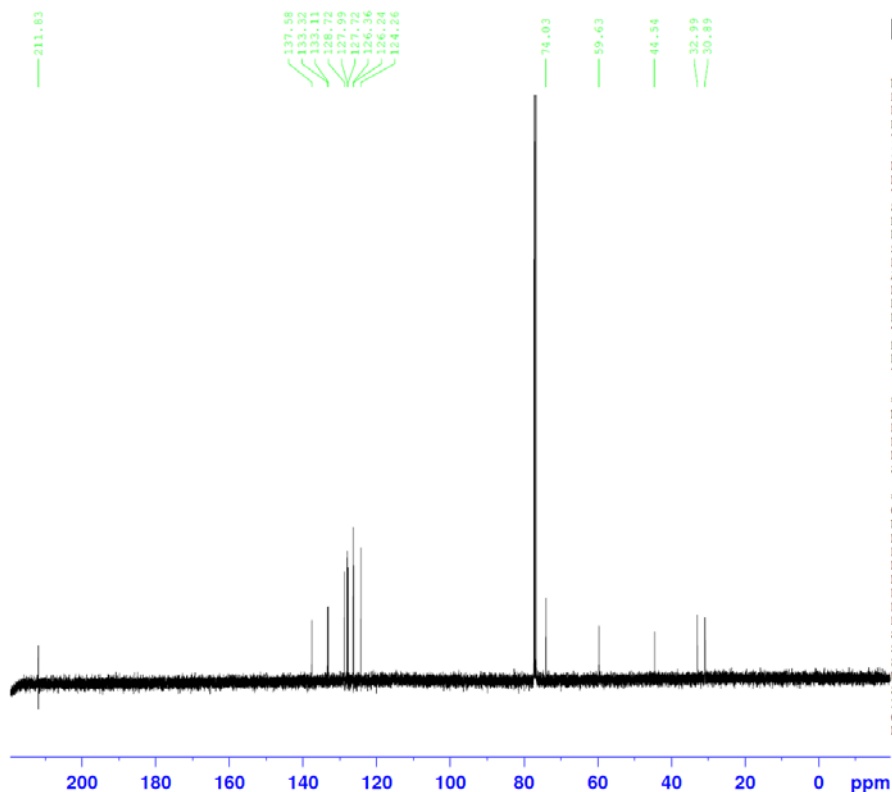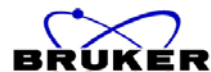

```
NAME XZH3-150-d-C13
EXPNO 2
PROCNO 1
Date_ 20090514
Time 17.25
INSTRUM spect
PROBHD 5 mm TXI 1H-13
PULPROG zgpg30
TD 65536
SOLVENT CDCl3
NS 2024
DS 4
SWH 30030.029 Hz
FIDRES 0.458222 Hz
AQ 1.0912410 sec
RG 812.7
DW 16.650 usec
DE 7.50 usec
TE 296.8 K
D1 2.00000000 sec
D11 0.03000000 sec
TD0 1
```

```
===== CHANNEL f1 =====
NUC1 13C
P1 12.20 usec
PL1 -3.00 dB
PLW 190.45114136 W
SFO1 125.7703643 MHz

===== CHANNEL f2 =====
CPDPRG2 waltz16
NUC2 1H
PCPD2 100.00 usec
PL2 0.00 dB
PL12 23.48 dB
PL13 25.00 dB
PL2W 15.07131863 W
PL12W 0.06763186 W
PL13W 0.04765970 W
SFO2 500.1320005 MHz
SI 32768
SF 125.7577924 MHz
WDW no
SSB 0
LB 0.00 Hz
GB 0
PC 1.40
```

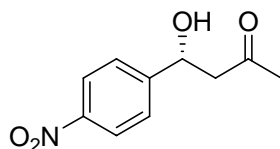

3-2-4nitro

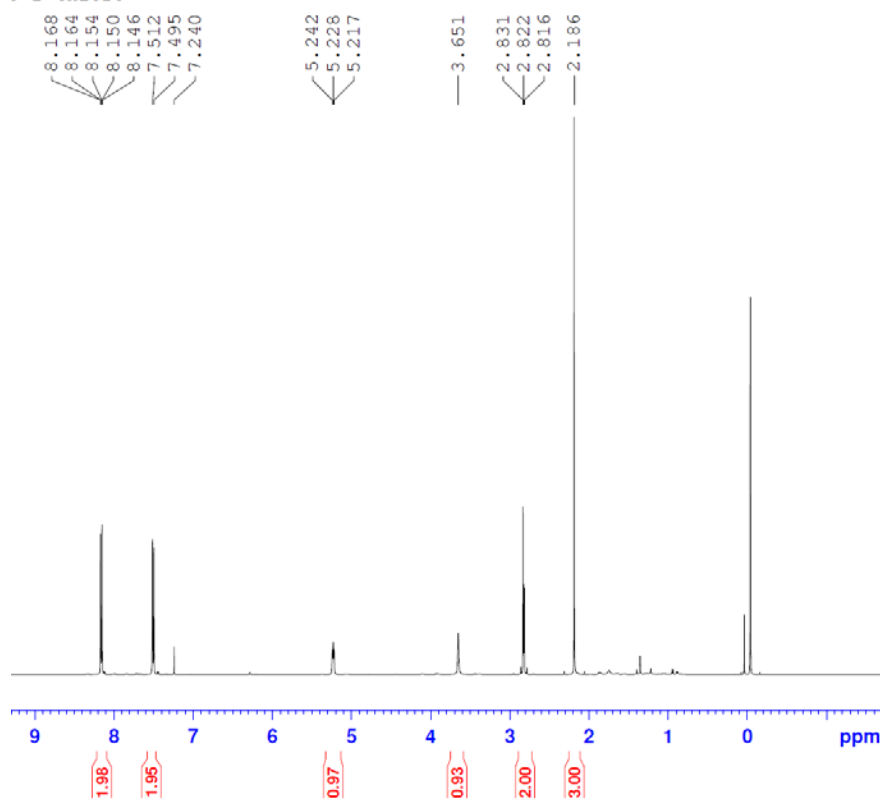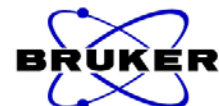

```

NAME      xzh3-2-4nitro
EXPNO     1
PROCNO    1
Date_     20081103
Time      14.59
INSTRUM   spect
PROBHD    5 mm TXI 1H-13
PULPROG   zg30
TD         65536
SOLVENT   CDCl3
NS         16
DS         2
SWH        10330.578 Hz
FIDRES     0.157632 Hz
AQ         3.1720407 sec
RG         57
DW         48.400 usec
DE         7.50 usec
TE         297.9 K
D1         1.00000000 sec
TD0        1
    
```

```

----- CHANNEL f1 -----
NUC1      1H
P1         6.70 usec
PL1        0.00 dB
PL1W       15.07131863 W
SFO1       500.1330885 MHz
SI         32768
SF         500.1300230 MHz
WDW        EM
SSB        0
LB         0.30 Hz
GB         0
PC         1.00
    
```

xzh3-2-4nitro-C13

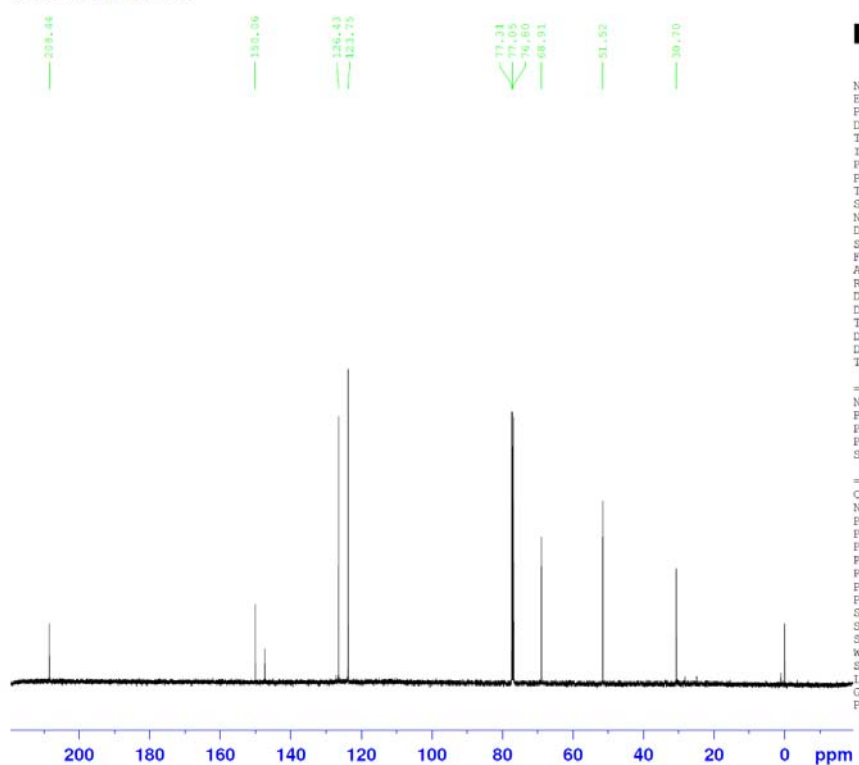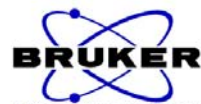

```

NAME      xzh3-2-4nitro-C13
EXPNO     1
PROCNO    1
Date_     20081103
Time      15.32
INSTRUM   spect
PROBHD    5 mm TXI 1H-13
PULPROG   zgpg30
TD         65536
SOLVENT   CDCl3
NS         500
DS         4
SWH        30030.029 Hz
FIDRES     0.458222 Hz
AQ         1.0912410 sec
RG         7298.2
DW         16.650 usec
DE         7.50 usec
TE         298.4 K
D1         2.00000000 sec
D11        0.03000000 sec
TD0        1
    
```

```

----- CHANNEL f1 -----
NUC1      13C
P1         12.20 usec
PL1        -3.00 dB
PL1W       190.45114136 W
SFO1       125.7703643 MHz

----- CHANNEL f2 -----
CPDPRG2   waltz16
NUC2      1H
PCPD2     100.00 usec
PL2        0.00 dB
PL12       23.48 dB
PL13       25.00 dB
PL2W       15.07131863 W
PL12W     0.06763186 W
PL13W     0.04765970 W
SFO2       500.1320005 MHz
SI         32768
SF         125.7577890 MHz
WDW        EM
SSB        0
LB         1.00 Hz
GB         0
PC         1.40
    
```

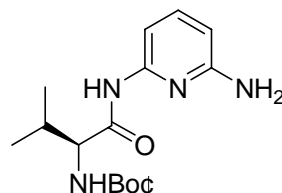

PDF Complete.  
 Click Here to upgrade to  
 Unlimited Pages and Expanded Features

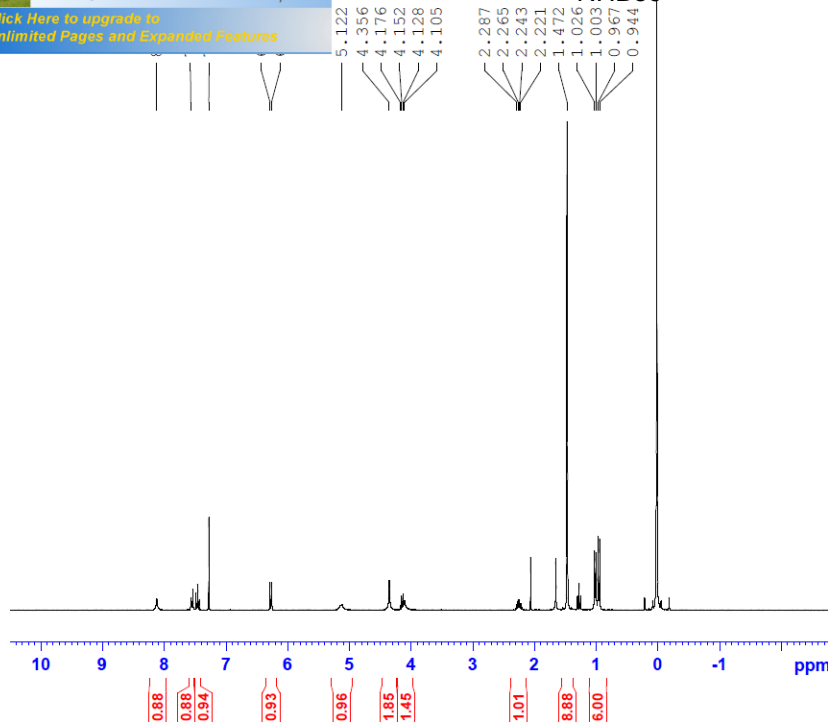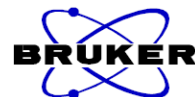

```

Current Data Parameters
NAME          xzh3-10
EXPNO         3
PROCNO        2

F2 - Acquisition Parameters
Date_         20081116
Time          9.14
INSTRUM       spect
PROBHD        5 mm Multinucl
PULPROG       zg30
TD            65536
SOLVENT       CDCl3
NS            16
DS            2
SWH           6188.119 Hz
FIDRES        0.094423 Hz
AQ            5.2954397 sec
RG            645.1
DW            80.800 usec
DE            6.00 usec
TE            300.0 K
D1            1.00000000 sec
TD0           1

===== CHANNEL f1 =====
NUC1          1H
P1            14.10 usec
PL1           3.00 dB
SFO1          300.1318534 MHz

F2 - Processing parameters
SI            32768
SF            300.1300000 MHz
WDW           EM
SSB           0
LB            0.30 Hz
GB            0
PC            1.00
    
```

xzh3-110B-C13

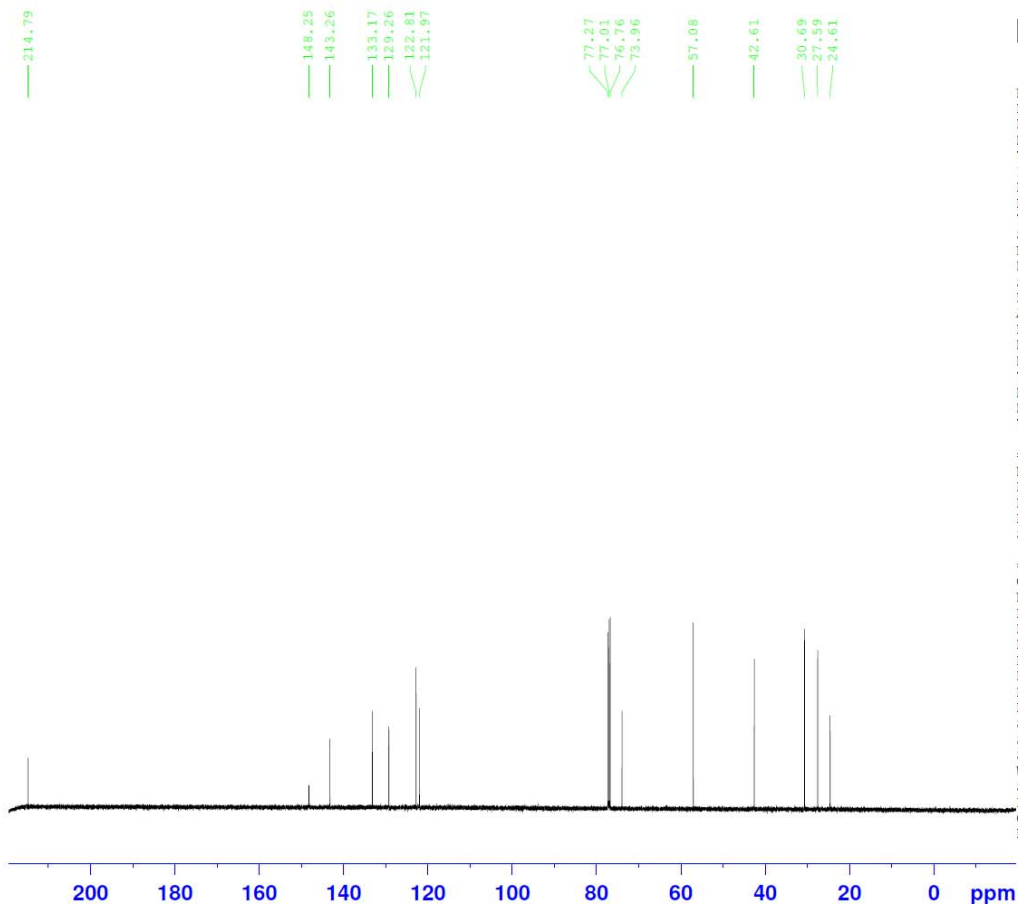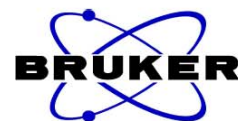

```

NAME          xzh3-110-B-C13
EXPNO         2
PROCNO        1
Date_         20090313
Time          9.47
INSTRUM       spect
PROBHD        5 mm TXI 1H-13
PULPROG       zgpg30
TD            65536
SOLVENT       CDCl3
NS            898
DS            4
SWH           30030.029 Hz
FIDRES        0.458222 Hz
AQ            1.0912410 sec
RG            1024
DW            16.650 usec
DE            7.50 usec
TE            297.2 K
D1            2.00000000 sec
D11           0.03000000 sec
TD0           1

===== CHANNEL f1 =====
NUC1          13C
P1            12.20 usec
PL1           -3.00 dB
PL1W          190.45114136 W
SFO1          125.7703643 MHz

===== CHANNEL f2 =====
CPDPRG2       waltz16
NUC2          1H
PCPD2         100.00 usec
PL2           0.00 dB
PL12          23.48 dB
PL13          25.00 dB
PL2W          15.07131863 W
PL12W         0.06763186 W
PL13W         0.04765970 W
SFO2          500.1320005 MHz
SI            32768
SF            125.7577945 MHz
WDW           no
SSB           0
LB            0.00 Hz
GB            0
PC            1.40
    
```

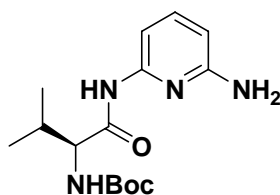

Chemical Formula:  $C_{15}H_{24}N_4O_3$

Exact Mass: 308.18

Molecular Weight: 308.38

$m/z$ : 308.18 (100.0%), 309.19 (16.6%), 310.19 (2.2%), 309.18 (1.5%)

Elemental Analysis: C, 58.42; H, 7.84; N, 18.17; O, 15.56

## ESI: M+Na

### Display Report

#### Analysis Info

|               |                       |                  |                   |
|---------------|-----------------------|------------------|-------------------|
| Analysis Name | XZH-1100.d            | Acquisition Date | 10/27/08 14:04:20 |
| Method        | NOVAKS.M              | Operator         | Administrator     |
| Sample Name   | XZH2-110              | Instrument       | Esquire-LC_00137  |
| Comment       | Diluted 1/100 in MEQH |                  |                   |

#### Acquisition Parameter

|                   |            |              |            |                          |            |
|-------------------|------------|--------------|------------|--------------------------|------------|
| Ion Source Type   | ESI        | Ion Polarity | Positive   | Alternating Ion Polarity | n/a        |
| Mass Range Mode   | Std/Normal | Scan Begin   | 50.00 m/z  | Scan End                 | 500.00 m/z |
| Capillary Exit    | 105.0 Volt | Skim 1       | 32.7 Volt  | Trap Drive               | 35.4       |
| Accumulation Time | 95 $\mu$ s | Averages     | 20 Spectra | Auto MS/MS               | Off        |

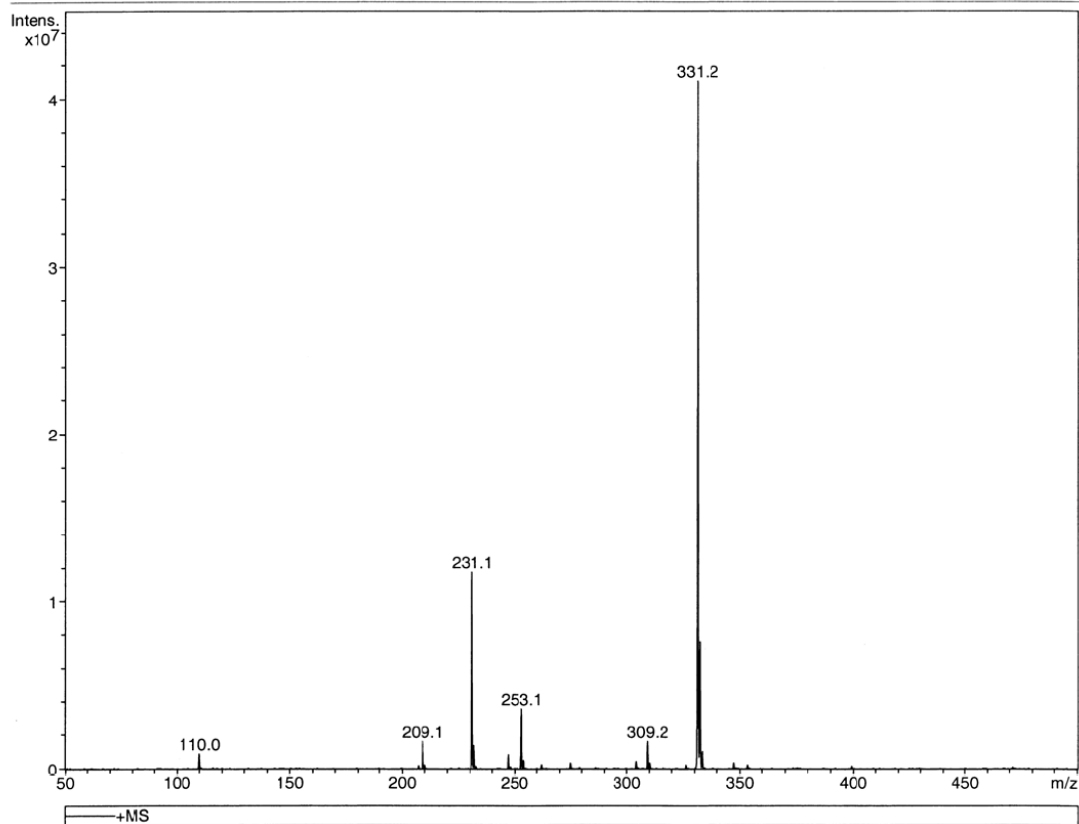

## HRMS

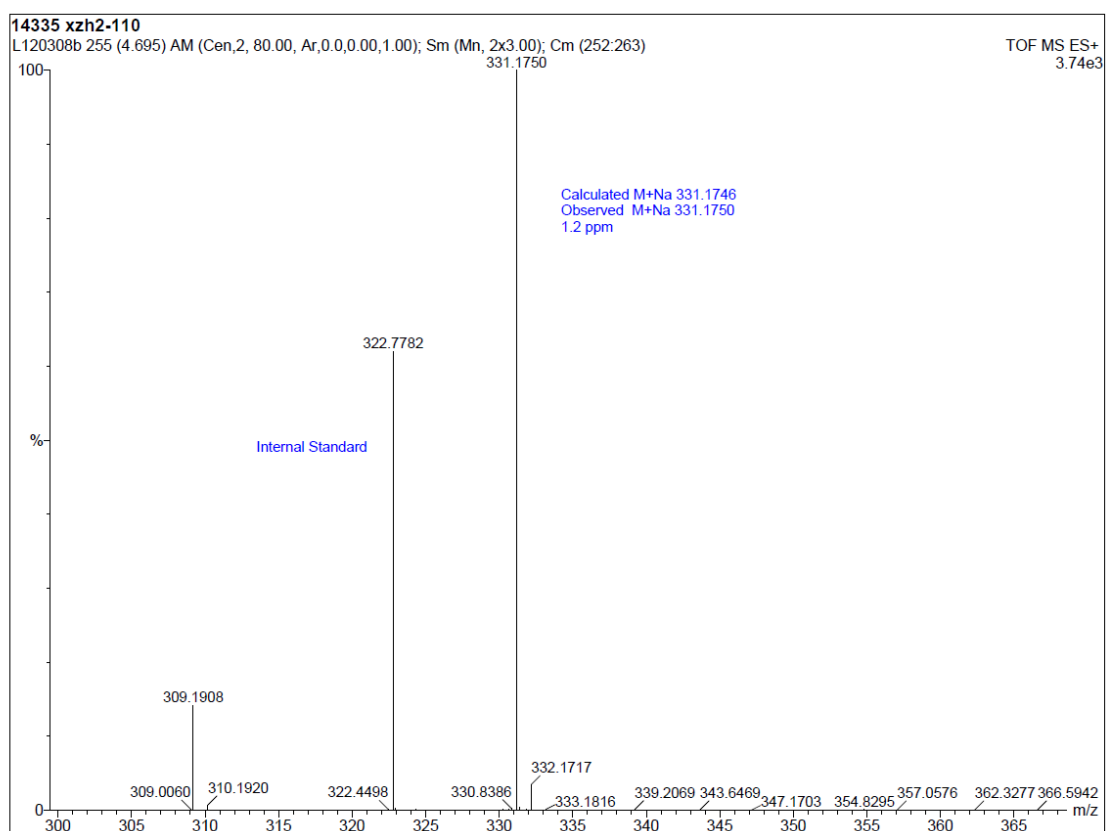

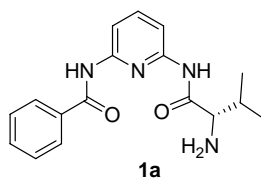

xzh3-53-pure-DMSO

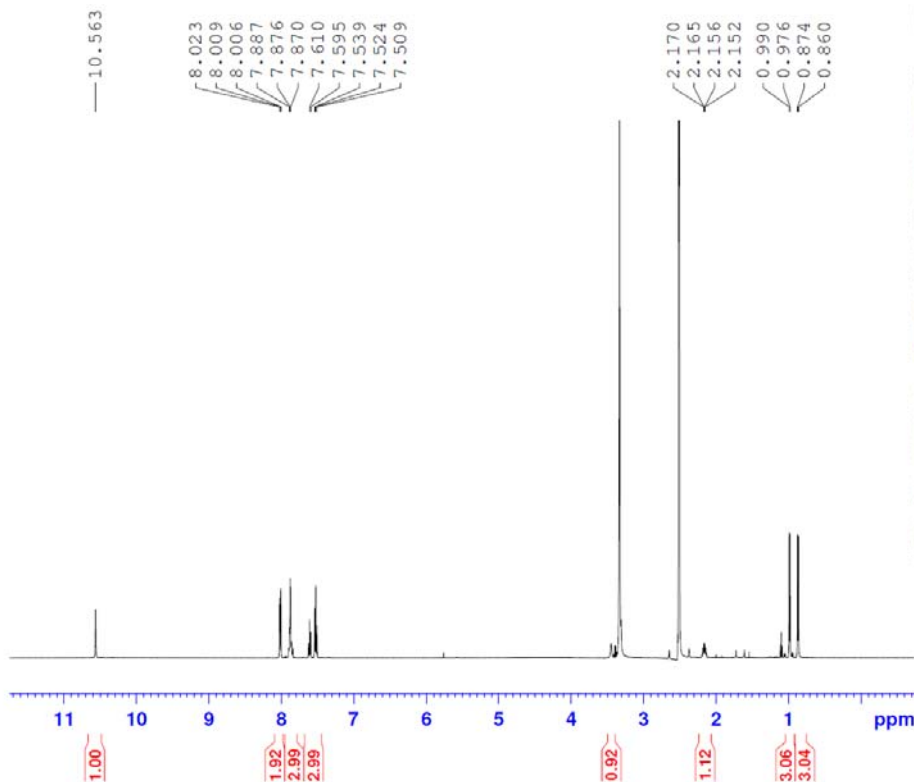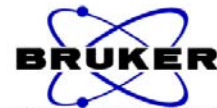

```

NAME      xzh3-53-pure-DMSO
EXPNO    2
PROCNO   1
Date_    20090120
Time     17.24
INSTRUM  spect
PROBHD   5 mm TXI 1H-13
PULPROG  zg30
TD       65536
SOLVENT  DMSO
NS       16
DS       2
SWH      10330.578 Hz
FIDRES   0.157632 Hz
AQ       3.1720407 sec
RG       161.3
DW       48.400 usec
DE       7.50 usec
TE       299.6 K
D1       1.00000000 sec
TD0      1
    
```

```

===== CHANNEL f1 =====
NUC1     1H
P1       6.70 usec
PL1      0.00 dB
PL1W     15.07131863 W
SFO1     500.1330885 MHz
SI       32768
SF       500.1300000 MHz
WDW      no
SSB      0
LB       0.00 Hz
GB       0
PC       1.00
    
```

xzh3-54-C13

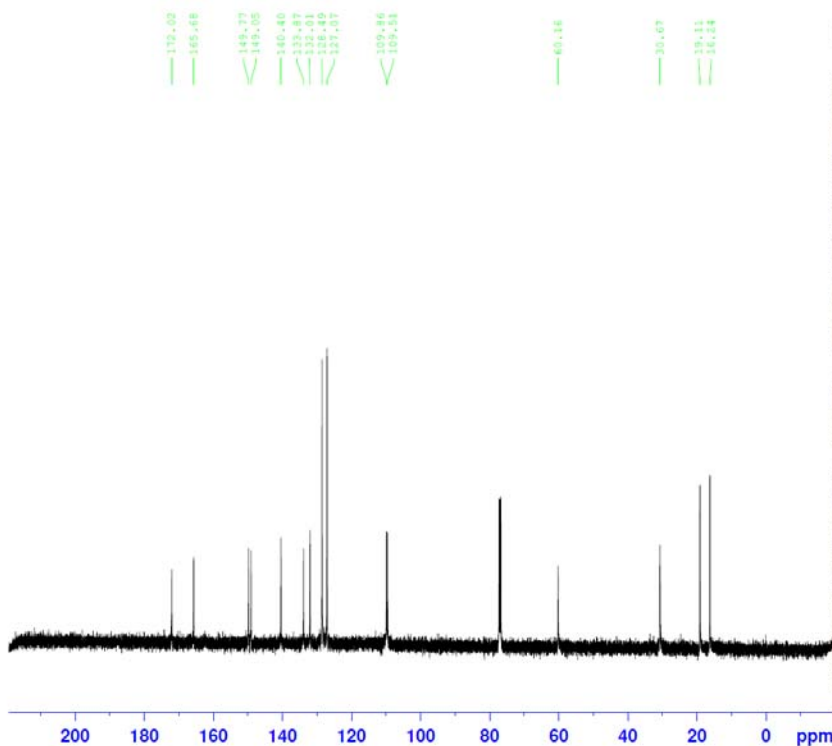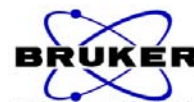

```

NAME      xzh3-54-C13
EXPNO    2
PROCNO   1
Date_    20090410
Time     15.30
INSTRUM  spect
PROBHD   5 mm TXI 1H-13
PULPROG  zgpg30
TD       65536
SOLVENT  CDCl3
NS       1024
DS       4
SWH      30030.029 Hz
FIDRES   0.458222 Hz
AQ       1.0912410 sec
RG       1024
DW       16.650 usec
DE       7.50 usec
TE       297.6 K
D1       2.00000000 sec
D11      0.03000000 sec
TD0      1
    
```

```

===== CHANNEL f1 =====
NUC1     13C
P1       12.20 usec
PL1      -3.00 dB
PL1W     190.45114136 W
SFO1     125.7703643 MHz
    
```

```

===== CHANNEL f2 =====
CPDPRG2  waltz16
NUC2     1H
PCPD2    100.00 usec
PL2      0.00 dB
PL12     23.48 dB
PL13     25.00 dB
PL2W     15.07131863 W
PL12W    0.06763186 W
PL13W    0.04765970 W
SFO2     500.1320005 MHz
SI       32768
SF       125.7578135 MHz
WDW      no
SSB      0
LB       0.00 Hz
GB       0
PC       1.40
    
```

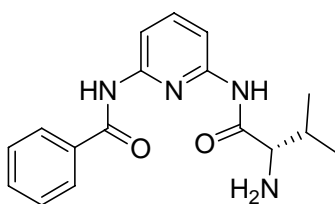

1a

Chemical Formula: C<sub>17</sub>H<sub>20</sub>N<sub>4</sub>O<sub>2</sub>

Exact Mass: 312.16

Molecular Weight: 312.37

m/z: 312.16 (100.0%), 313.16 (20.2%), 314.17 (1.6%)

Elemental Analysis: C, 65.37; H, 6.45; N, 17.94; O, 10.24

ESI: [M+1] 313.2

### Display Report

#### Analysis Info

Analysis Name xzh3-530.d  
Method NOVAKS.M  
Sample Name xzh3-53  
Comment Diluted 1/100 in MEOH

Acquisition Date 01/21/09 13:36:51  
Operator Administrator  
Instrument Esquire-LC\_00137

#### Acquisition Parameter

|                   |             |              |            |                          |            |
|-------------------|-------------|--------------|------------|--------------------------|------------|
| Ion Source Type   | ESI         | Ion Polarity | Positive   | Alternating Ion Polarity | n/a        |
| Mass Range Mode   | Std/Normal  | Scan Begin   | 150.00 m/z | Scan End                 | 500.00 m/z |
| Capillary Exit    | 79.2 Volt   | Skim 1       | 12.7 Volt  | Trap Drive               | 29.6       |
| Accumulation Time | 192 $\mu$ s | Averages     | 20 Spectra | Auto MS/MS               | Off        |

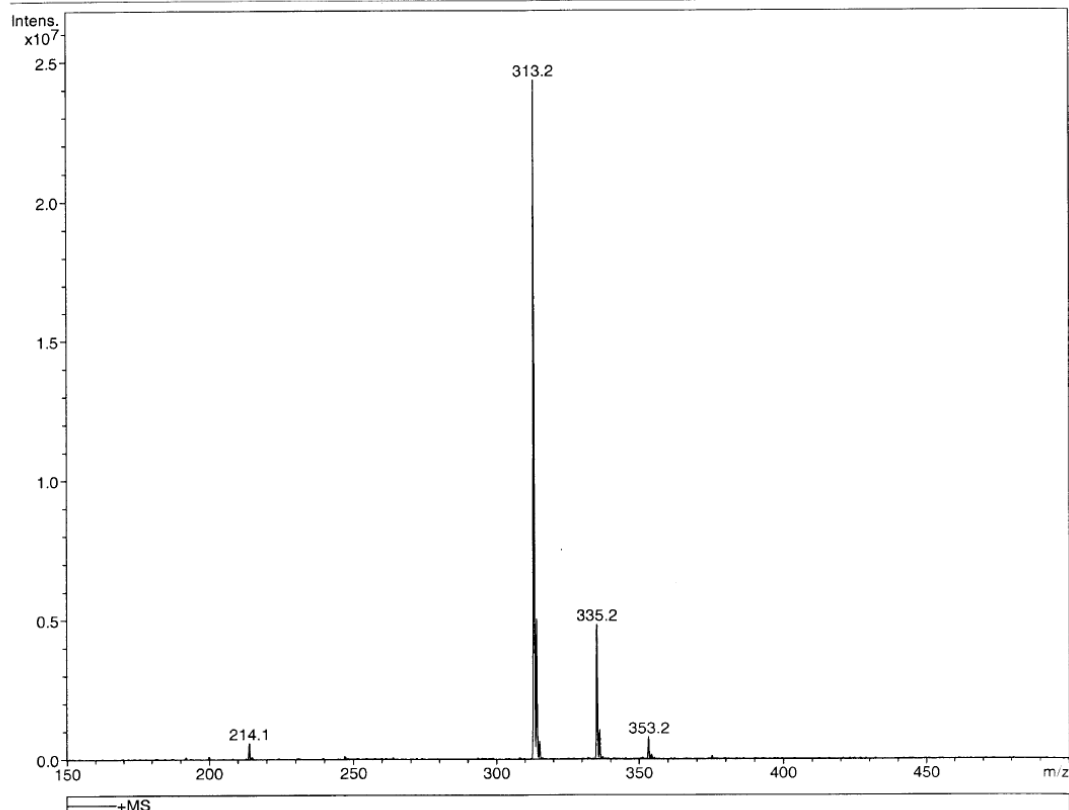

## HRMS

Calculated mass H+ 313.1664

Measured mass 313.1653

3.5 ppm

Copy of O041409F\_090414115914 #1-10 RT: 0.01-0.22 AV: 10 NL: 5.24E8  
T: FTMS + p ESI Full ms [100.00-1000.00]

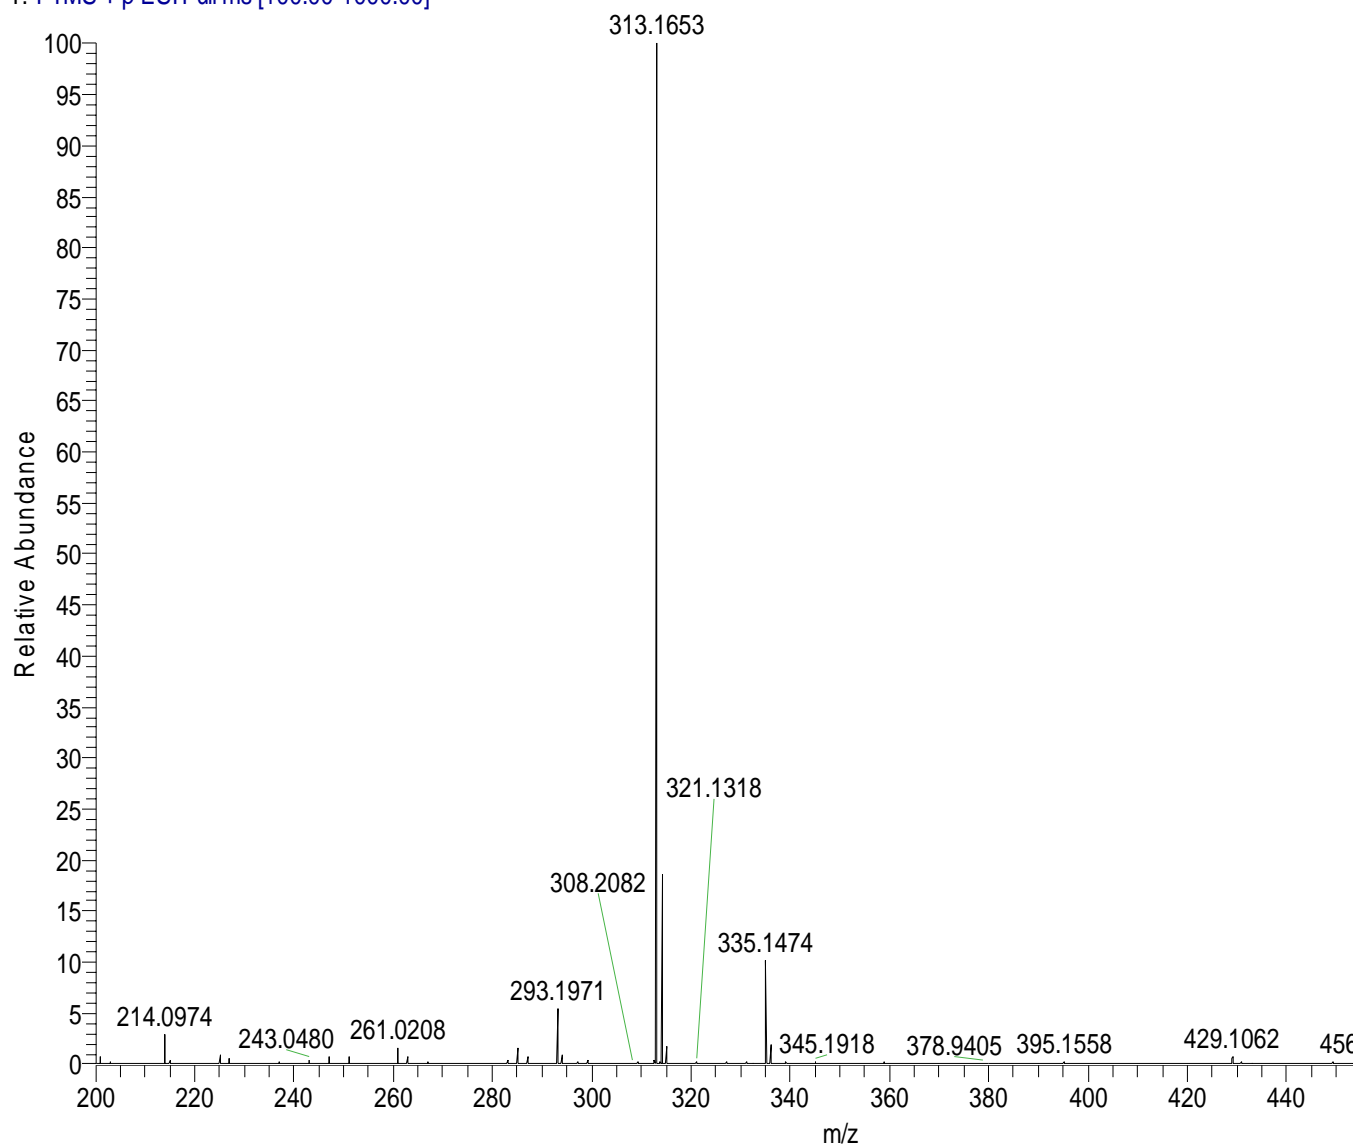



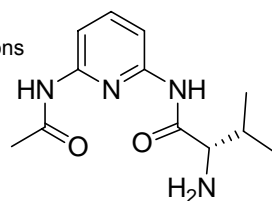

xzh3-97p

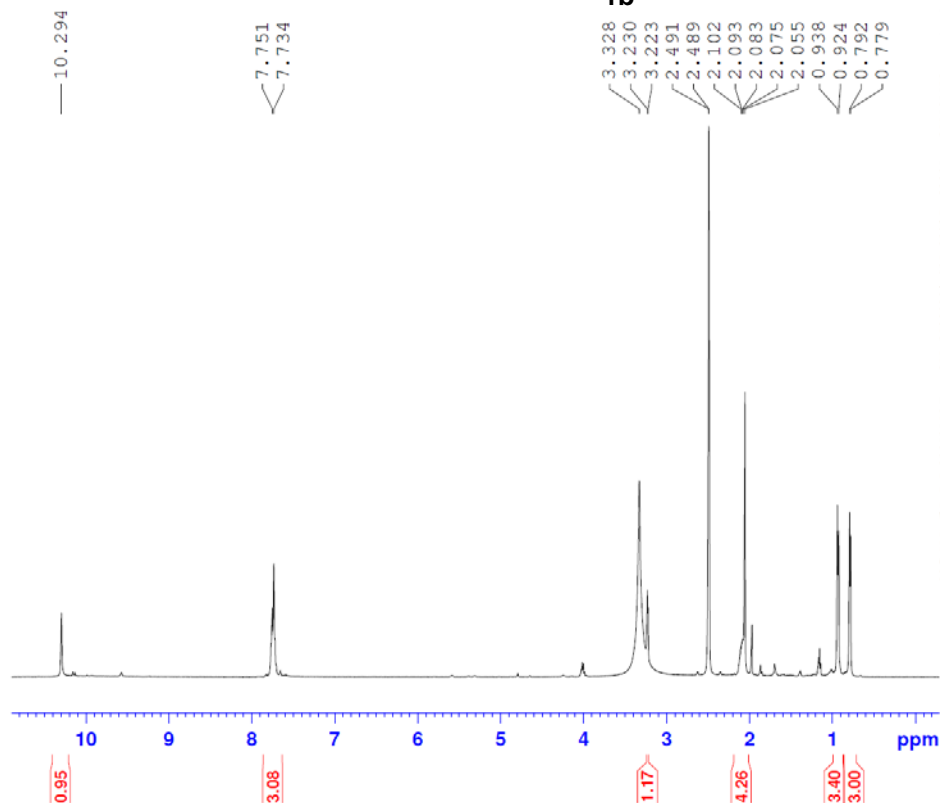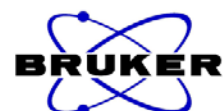

```

NAME      xzh3-97p
EXPNO    2
PROCNO   1
Date_    20090304
Time     10.06
INSTRUM  spect
PROBHD   5 mm TXI 1H-13
PULPROG  zg30
TD       65536
SOLVENT  DMSO
NS       16
DS       2
SWH      10330.578 Hz
FIDRES   0.157632 Hz
AQ       3.1720407 sec
RG       161.3
DW       48.400 usec
DE       7.50 usec
TE       297.7 K
D1       1.00000000 sec
TD0      1

===== CHANNEL f1 =====
NUC1     1H
P1       6.70 usec
PL1      0.00 dB
PL1W     15.07131863 W
SFO1     500.1330885 MHz
SI       32768
SF       500.1300090 MHz
WDW      no
SSB      0
LB       0.00 Hz
GB       0
PC       1.00
    
```

xzh3-97p-C13

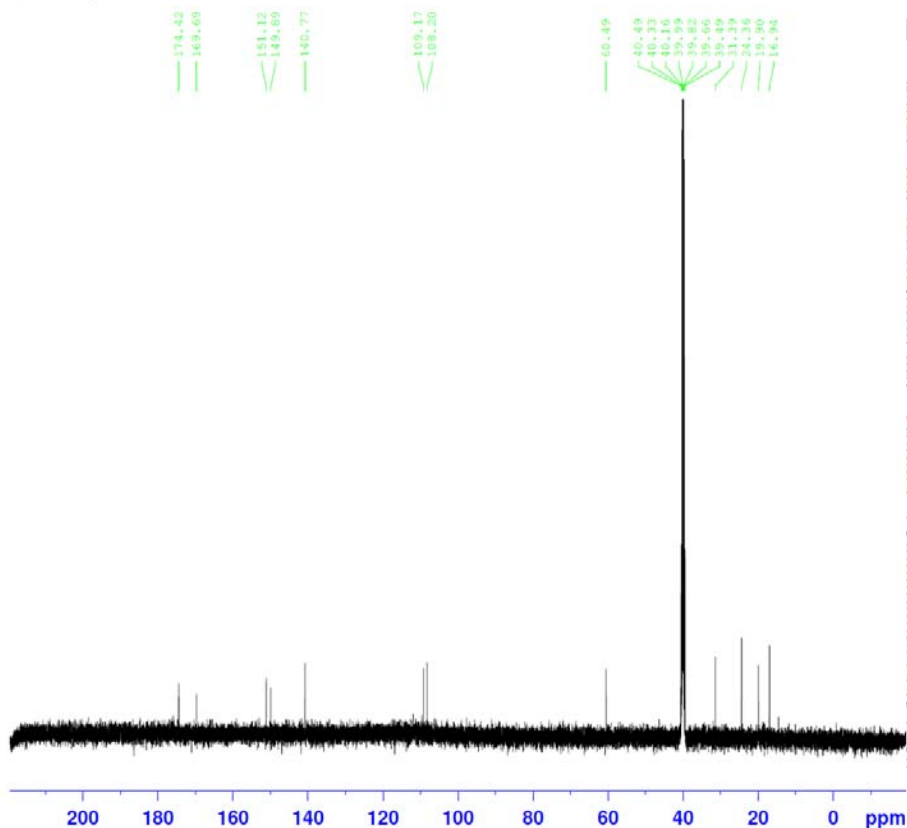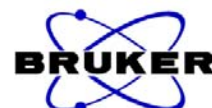

```

NAME      xzh3-97p-C13
EXPNO    2
PROCNO   1
Date_    20090304
Time     11.32
INSTRUM  spect
PROBHD   5 mm TXI 1H-13
PULPROG  zgpg30
TD       65536
SOLVENT  DMSO
NS       1516
DS       4
SWH      30030.029 Hz
FIDRES   0.458222 Hz
AQ       1.0912410 sec
RG       1149.4
DW       16.650 usec
DE       7.50 usec
TE       298.5 K
D1       2.00000000 sec
D11      0.03000000 sec
TD0      1

===== CHANNEL f1 =====
NUC1     13C
P1       12.20 usec
PL1      -3.00 dB
PL1W     190.45114136 W
SFO1     125.7703643 MHz

===== CHANNEL f2 =====
CPDPRG2  waltz16
NUC2     1H
PCPD2    100.00 usec
PL2      0.00 dB
PL12     23.48 dB
PL13     25.00 dB
PL2W     15.07131863 W
PL12W    0.06763186 W
PL13W    0.04765970 W
SFO2     500.1320005 MHz
SI       32768
SF       125.7577890 MHz
WDW      no
SSB      0
LB       0.00 Hz
GB       0
PC       1.40
    
```

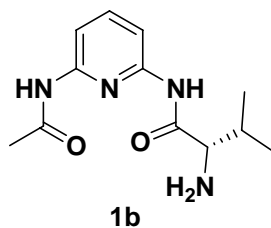

Chemical Formula:  $C_{12}H_{18}N_4O_2$

Exact Mass: 250.14

Molecular Weight: 250.3

m/z: 250.14 (100.0%), 251.15 (13.3%), 251.14 (1.5%), 252.15 (1.2%)

Elemental Analysis: C, 57.58; H, 7.25; N, 22.38; O, 12.78

ESI:  $[M-H]^-$  248.9

### Display Report

#### Analysis Info

Analysis Name XZH3-973.d  
Method XQ Default.ms  
Sample Name XZH3-97  
Comment Diluted 1/100 in MEOH

Acquisition Date 03/10/09 12:23:30  
Operator Administrator  
Instrument Esquire-LC\_00137

#### Acquisition Parameter

|                   |               |              |            |                          |            |
|-------------------|---------------|--------------|------------|--------------------------|------------|
| Ion Source Type   | ESI           | Ion Polarity | Negative   | Alternating Ion Polarity | n/a        |
| Mass Range Mode   | Std/Normal    | Scan Begin   | 50.00 m/z  | Scan End                 | 500.00 m/z |
| Capillary Exit    | -88.0 Volt    | Skim 1       | -19.9 Volt | Trap Drive               | 41.9       |
| Accumulation Time | 27191 $\mu$ s | Averages     | 20 Spectra | Auto MS/MS               | Off        |

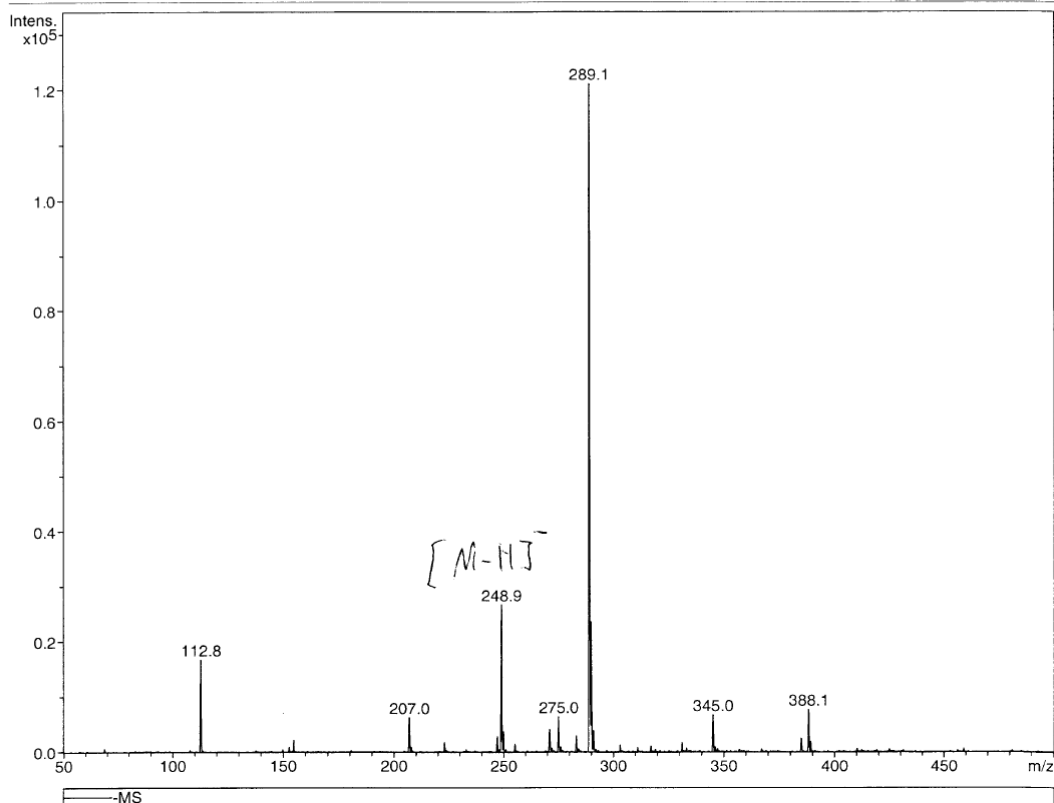

## HRMS

Calculated mass H<sup>+</sup> 251.1508

Measured mass 251.1500

3.18 ppm

Copy (3) of O041409A #1-10 RT: 0.01-0.22 AV: 10 NL: 9.54E7  
T: FTMS + p ESI Full ms [100.00-1000.00]

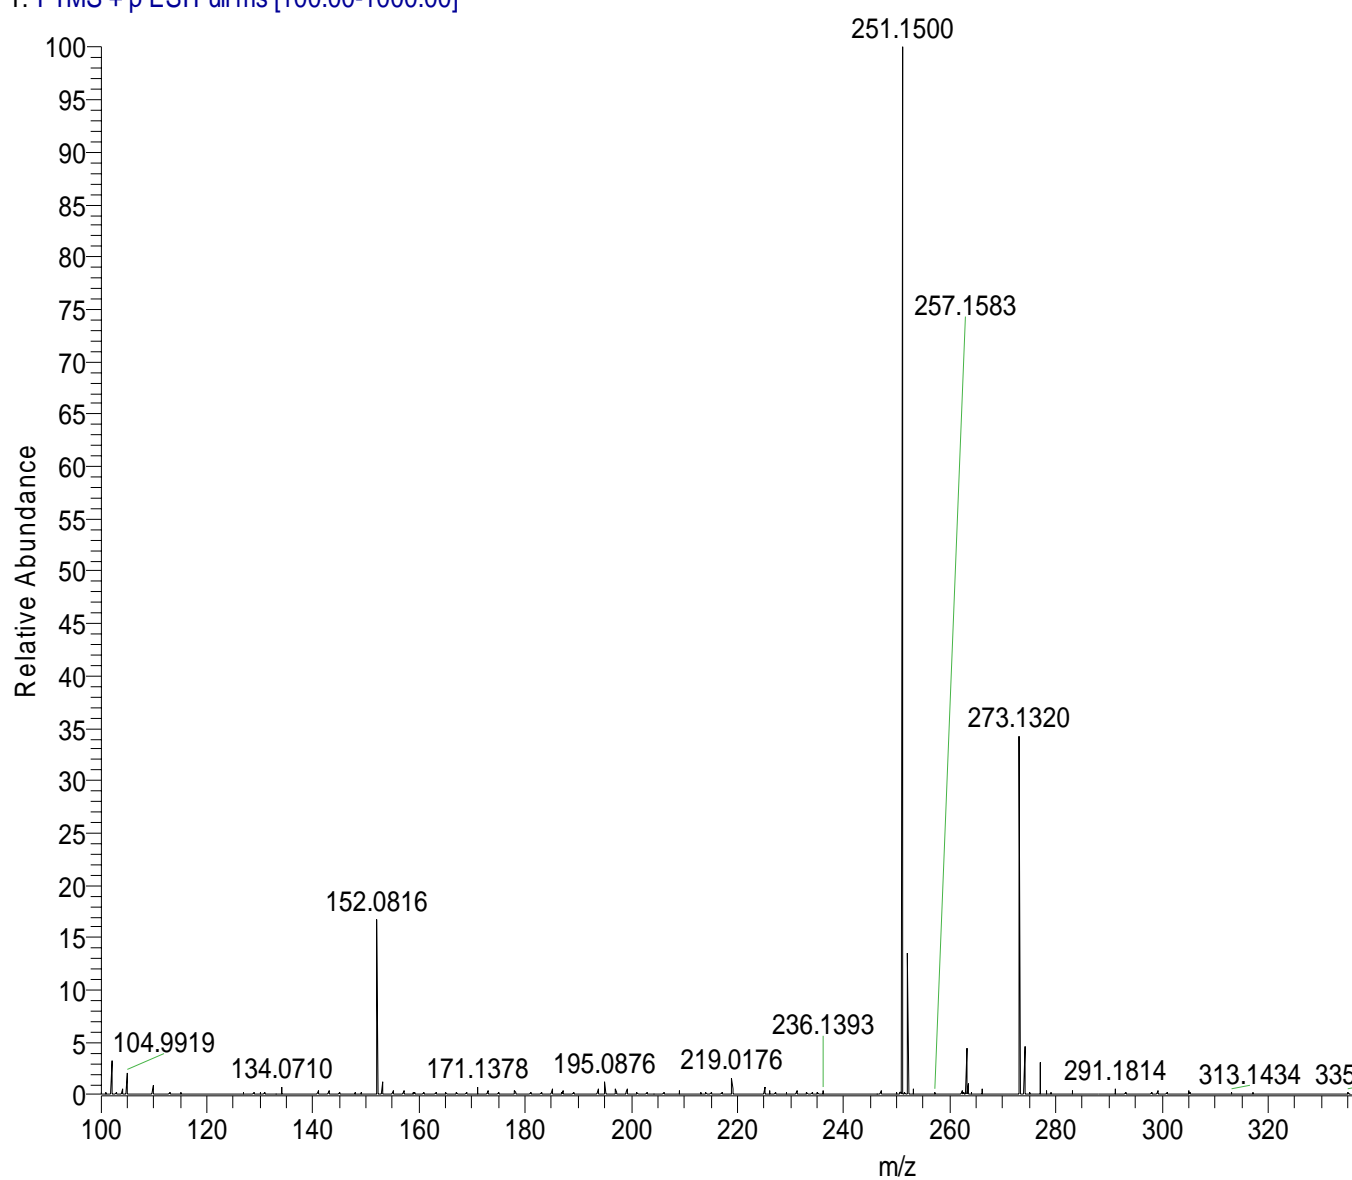

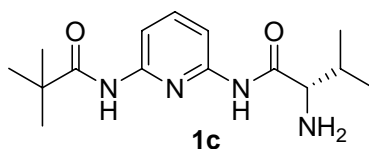

xzh3-98-MEOH-H

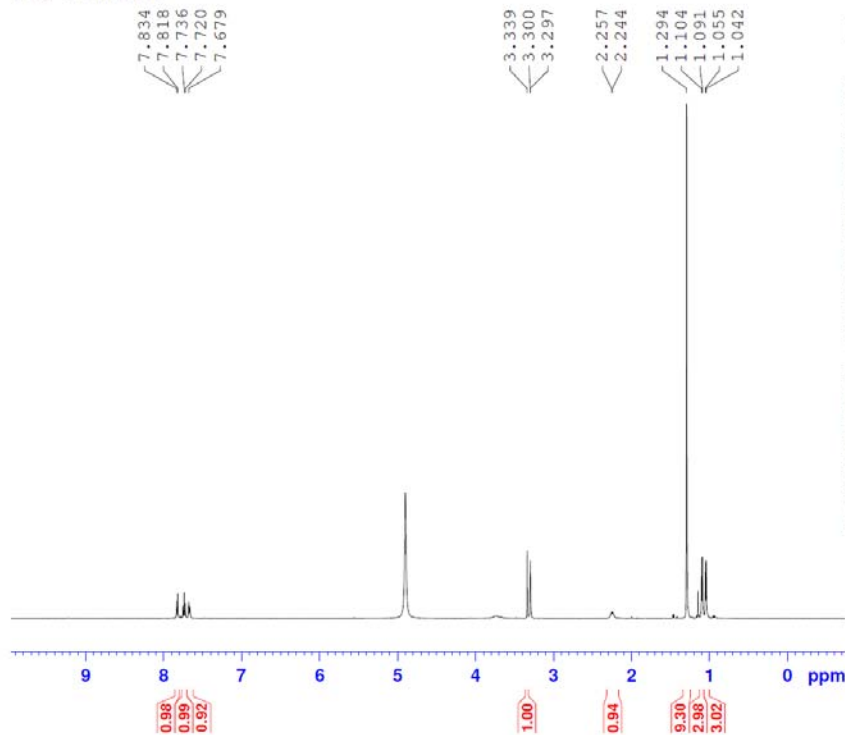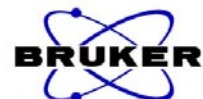

```

NAME      xzh3-98-MEOH-H
EXPNO     2
PROCNO    1
Date_     20090411
Time      10.15
INSTRUM   spect
PROBHD    5 mm TXI 1H-13
PULPROG   zg30
TD         65536
SOLVENT   MeOD
NS         8
DS         2
SWH       10330.578 Hz
FIDRES    0.157632 Hz
AQ         3.1720407 sec
RG         114
DW         48.400 usec
DE         7.50 usec
TE         297.1 K
D1         1.00000000 sec
TD0        1

===== CHANNEL f1 =====
NUC1       1H
P1         6.70 usec
PL1        0.00 dB
PL1W       15.07131863 W
SF01       500.1330885 MHz
SI         32768
SF         500.1300155 MHz
WDW        no
SSB        0
LB         0.00 Hz
GB         0
PC         1.00
    
```

xzh3-98-MEOH--C13-1

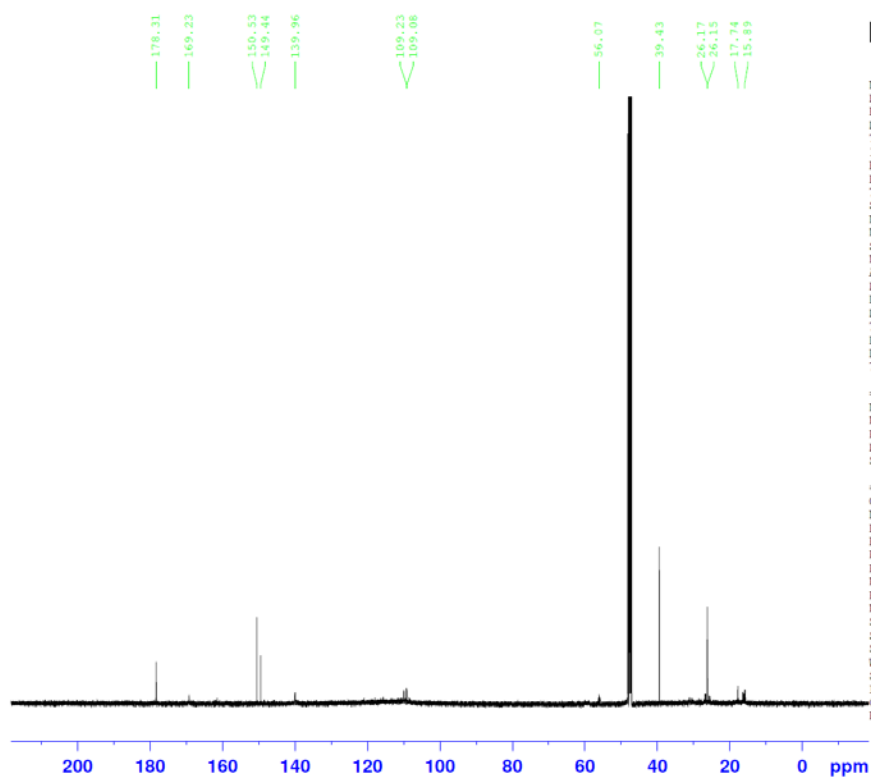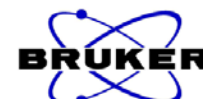

```

NAME      xzh3-98-MEOH--C13-1
EXPNO     2
PROCNO    1
Date_     20090413
Time      7.50
INSTRUM   spect
PROBHD    5 mm TXI 1H-13
PULPROG   zgpg30
TD         65536
SOLVENT   MeOD
NS         15024
DS         4
SWH       29761.904 Hz
FIDRES    0.454131 Hz
AQ         1.1010716 sec
RG         11585.2
DW         16.800 usec
DE         8.94 usec
TE         297.7 K
D1         2.00000000 sec
D11        0.03000000 sec
TD0        1

===== CHANNEL f1 =====
NUC1       13C
P1         12.20 usec
PL1        -3.00 dB
PL1W       190.45114136 W
SF01       125.7703643 MHz

===== CHANNEL f2 =====
CPDPRG2    waltz16
NUC2       1H
PCPD2     100.00 usec
PL2        0.00 dB
PL12       23.48 dB
PL13       25.00 dB
PL2W       15.07131863 W
PL12W      0.06763186 W
PL13W      0.04765970 W
SF02       500.1320005 MHz
SI         32768
SF         125.7577890 MHz
WDW        no
SSB        0
LB         0.00 Hz
GB         0
PC         1.40
    
```

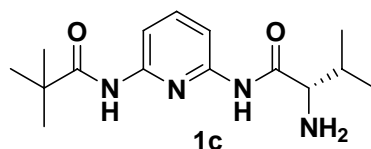

**Chemical Formula: C<sub>15</sub>H<sub>24</sub>N<sub>4</sub>O<sub>2</sub>**  
**Exact Mass: 292.19**  
**Molecular Weight: 292.38**  
**m/z: 292.19 (100.0%), 293.19 (17.8%), 294.20 (1.3%)**  
**Elemental Analysis: C, 61.62; H, 8.27; N, 19.16; O, 10.94**

### ESI [M+H]<sup>+</sup> 293.2

#### Analysis Info

|               |                        |                  |                   |
|---------------|------------------------|------------------|-------------------|
| Analysis Name | XZh3-980.d             | Acquisition Date | 03/10/09 13:16:00 |
| Method        | XQ Default.ms          | Operator         | Administrator     |
| Sample Name   | XZH3-98                | Instrument       | Esquire-LC_00137  |
| Comment       | Diluted 1/100 in MEQH. |                  |                   |

#### Acquisition Parameter

|                   |            |              |            |                          |            |
|-------------------|------------|--------------|------------|--------------------------|------------|
| Ion Source Type   | ESI        | Ion Polarity | Positive   | Alternating Ion Polarity | n/a        |
| Mass Range Mode   | Std/Normal | Scan Begin   | 150.00 m/z | Scan End                 | 500.00 m/z |
| Capillary Exit    | 82.2 Volt  | Skim 1       | 15.2 Volt  | Trap Drive               | 30.7       |
| Accumulation Time | 140 μs     | Averages     | 20 Spectra | Auto MS/MS               | Off        |

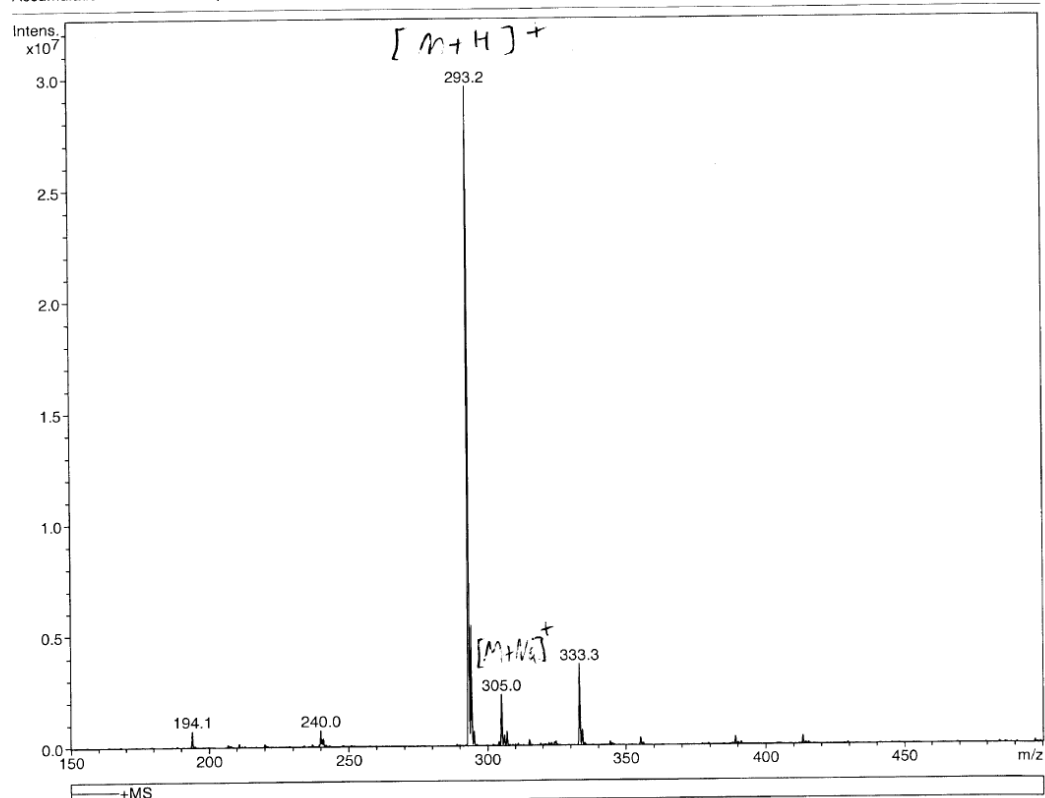

## HRMS

Calculated mass H+ 293.1977

Measured mass 293.1976

0.3 ppm

Copy (2) of O041409G\_090414115914 #1-10 RT: 0.01-0.22 AV: 10 NL: 1.61E7  
T: FTMS + p ESI Full ms [100.00-1000.00]

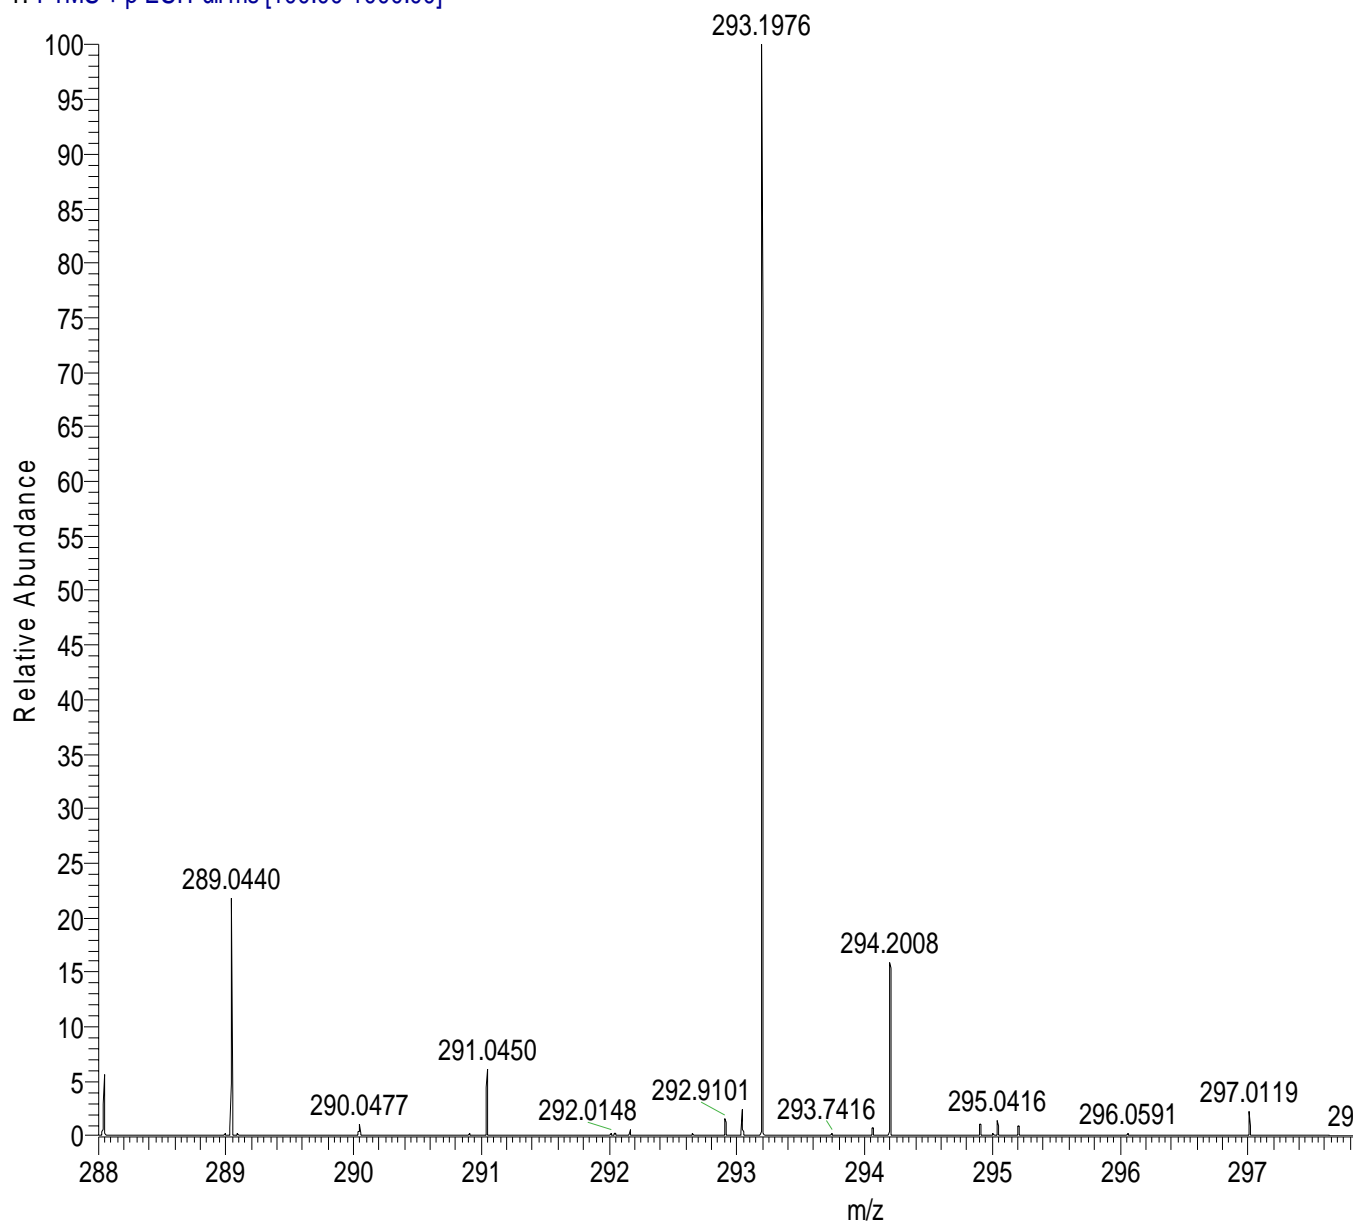

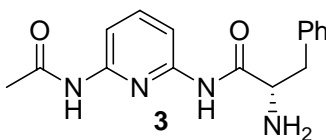

xzh3-119-H

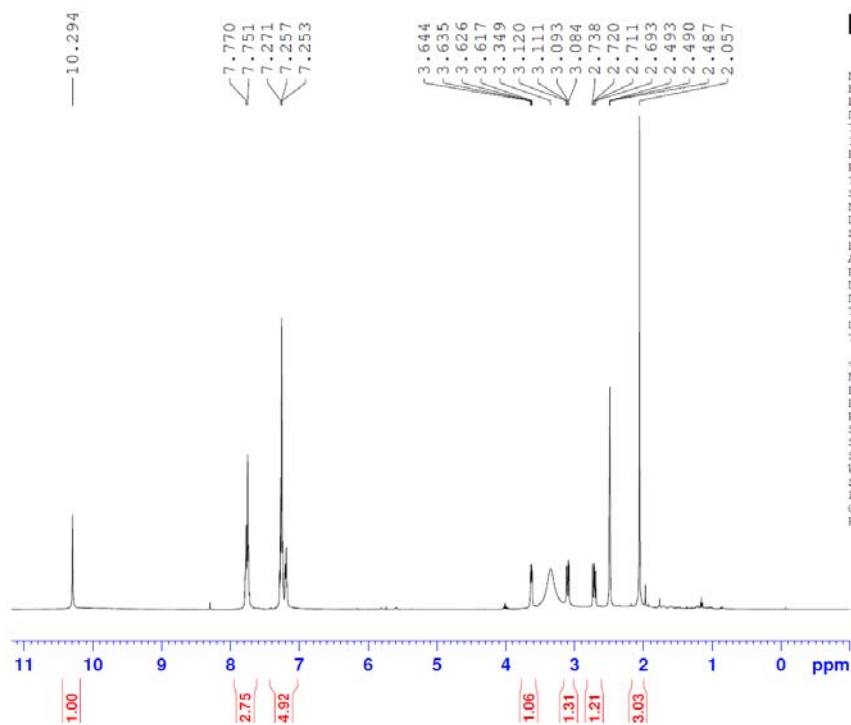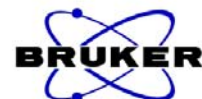

```

NAME      xzh3-119-H
EXPNO    2
PROCNO   1
Date_    20090410
Time     13.10
INSTRUM  spect
PROBHD   5 mm TXI 1H-13
PULPROG  zg30
TD       65536
SOLVENT  DMSO
NS       16
DS       2
SWH      10330.578 Hz
FIDRES   0.157632 Hz
AQ       3.1720407 sec
RG       45.3
DM       48.400 usec
DE       7.50 usec
TE       297.1 K
D1       1.00000000 sec
TD0      1

----- CHANNEL f1 -----
NUC1     1H
P1       6.70 usec
PL1      0.00 dB
PL1W     15.07131863 W
SFO1     500.1330885 MHz
SI       32768
SF       500.1300094 MHz
WDW      no
SSB      0
LB       0.00 Hz
GB       0
PC       1.00
    
```

xzh3-119-C13

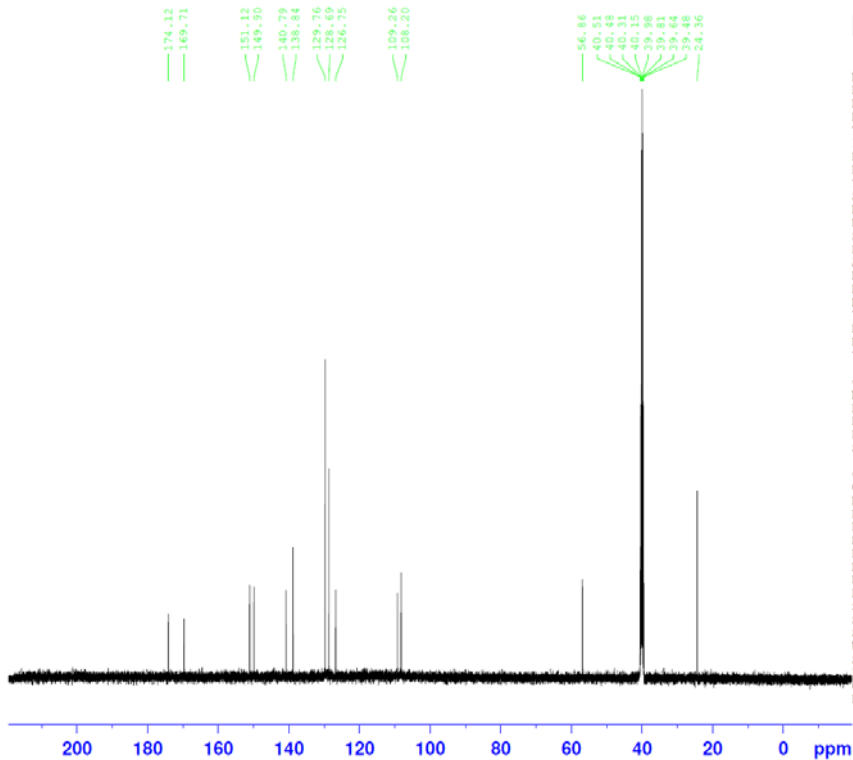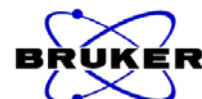

```

NAME      xzh3-119-C13
EXPNO    2
PROCNO   1
Date_    20090410
Time     14.24
INSTRUM  spect
PROBHD   5 mm TXI 1H-13
PULPROG  zgpg30
TD       65536
SOLVENT  DMSO
NS       1320
DS       4
SWH      30030.029 Hz
FIDRES   0.458222 Hz
AQ       1.0912410 sec
RG       5160.6
DM       16.650 usec
DE       7.50 usec
TE       297.9 K
D1       2.00000000 sec
D11      0.03000000 sec
TD0      1

----- CHANNEL f1 -----
NUC1     13C
P1       12.20 usec
PL1      -3.00 dB
PL1W     190.45114136 W
SFO1     125.7703643 MHz

----- CHANNEL f2 -----
CPDPRG2  waltz16
NUC2     1H
PCPD2    100.00 usec
PL2      0.00 dB
PL12     23.48 dB
PL13     25.00 dB
PL2W     15.07131863 W
PL12W    0.06763186 W
PL13W    0.04765970 W
SFO2     500.1320005 MHz
SI       32768
SF       125.7577890 MHz
WDW      no
SSB      0
LB       0.00 Hz
GB       0
PC       1.40
    
```

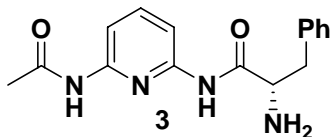

**Chemical Formula:** C<sub>16</sub>H<sub>18</sub>N<sub>4</sub>O<sub>2</sub>  
**Exact Mass:** 298.14  
**Molecular Weight:** 298.34  
**m/z:** 298.14 (100.0%), 299.15 (17.6%), 300.15 (1.9%), 299.14 (1.5%)  
**Elemental Analysis:** C, 64.41; H, 6.08; N, 18.78; O, 10.73

**ESI [M+H] 299.2 [M+Na] 321.2**

**Analysis Info**

Analysis Name XZH-1190.d  
Method XQ Default.ms  
Sample Name XZH3-119  
Comment Diluted 1/100 in MEOH.

Acquisition Date 04/01/09 11:28:35  
Operator Administrator  
Instrument Esquire-LC\_00137

**Acquisition Parameter**

|                   |             |              |            |                          |            |
|-------------------|-------------|--------------|------------|--------------------------|------------|
| Ion Source Type   | ESI         | Ion Polarity | Positive   | Alternating Ion Polarity | n/a        |
| Mass Range Mode   | Std/Normal  | Scan Begin   | 50.00 m/z  | Scan End                 | 700.00 m/z |
| Capillary Exit    | 82.2 Volt   | Skim 1       | 15.2 Volt  | Trap Drive               | 30.7       |
| Accumulation Time | 768 $\mu$ s | Averages     | 20 Spectra | Auto MS/MS               | Off        |

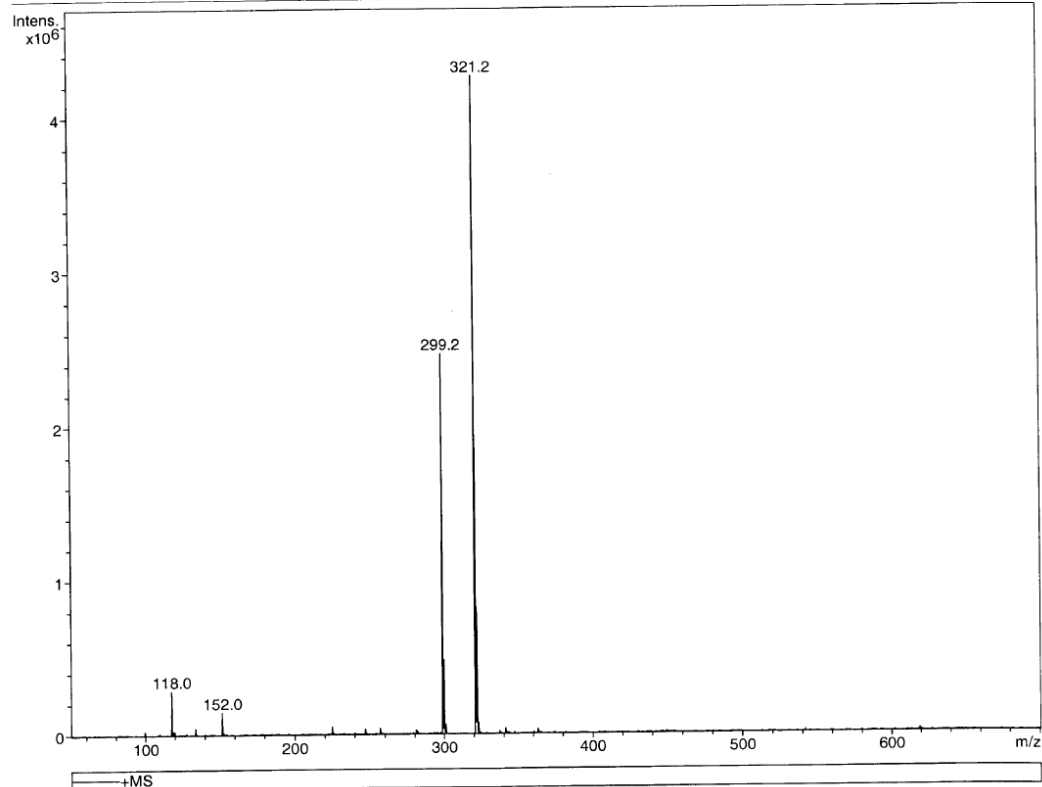



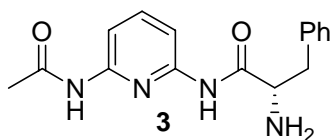

## HRMS

Calculated mass H<sup>+</sup> 299.1508

Measured mass 299.1500

2.7 ppm

Copy (2) of O041409D\_090414115914 #1-10 RT: 0.00-0.22 AV: 10 NL: 3.15E8  
T: FTMS + p ESI Full ms [100.00-1000.00]

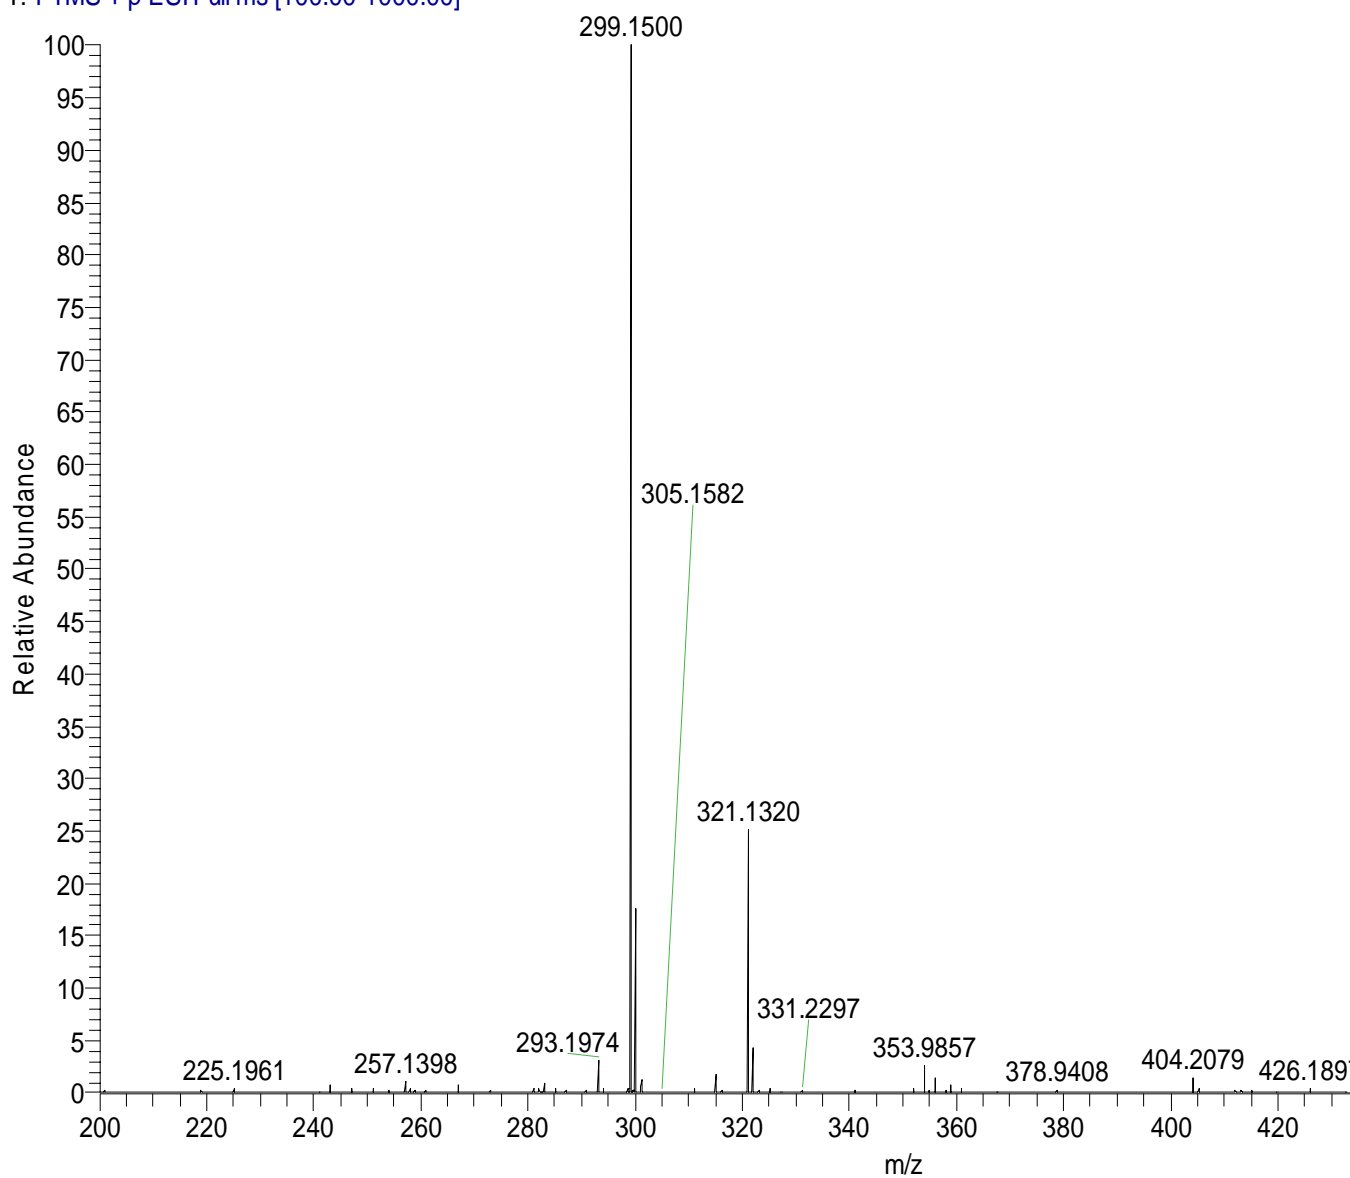

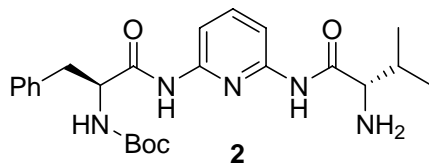

xzh3-107

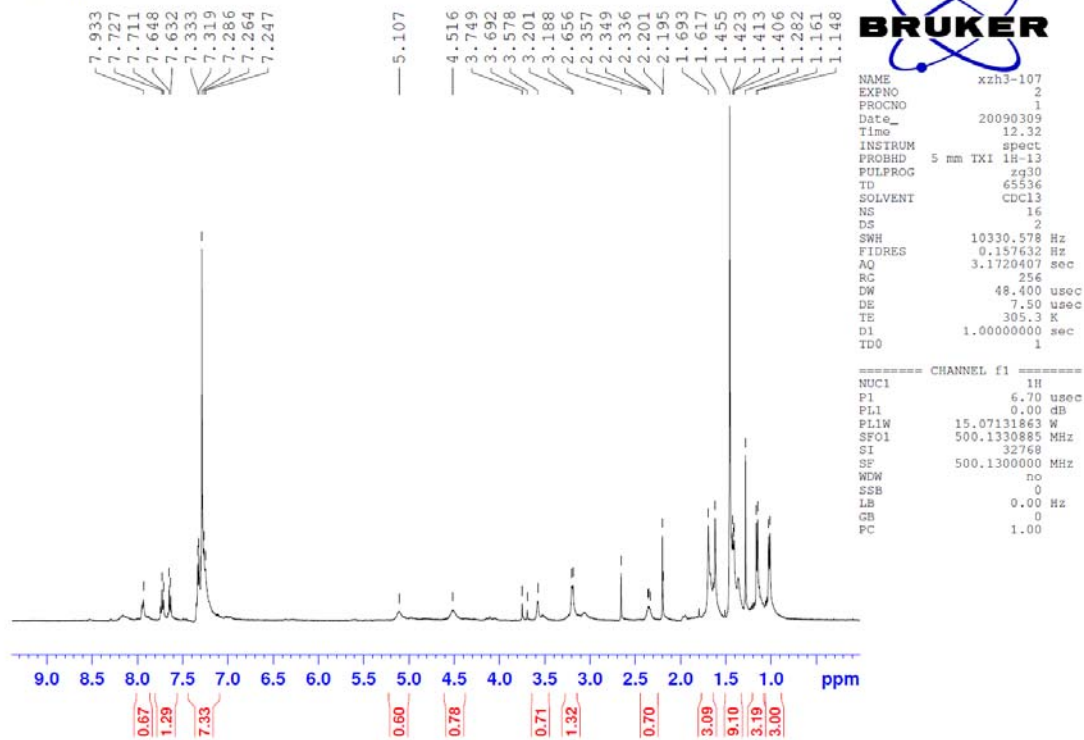

xzh3-107--C13-2

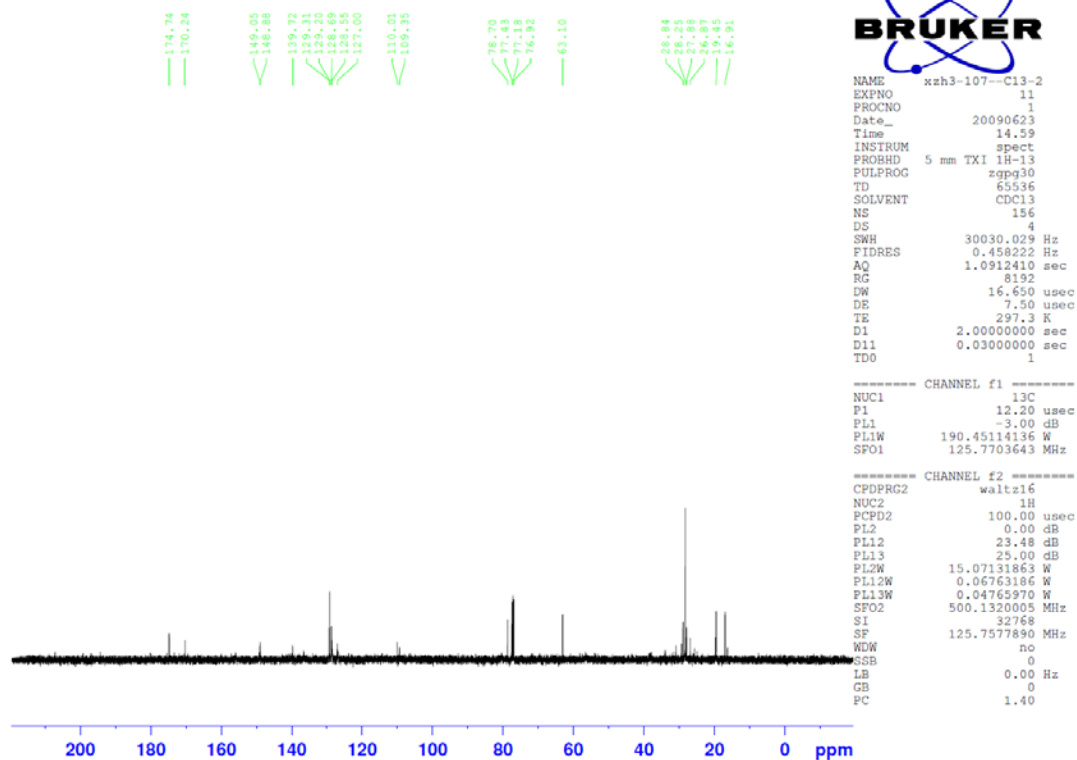

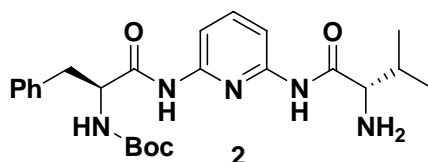

**Chemical Formula: C<sub>24</sub>H<sub>33</sub>N<sub>5</sub>O<sub>4</sub>**

**Exact Mass: 455.25**

**Molecular Weight: 455.55**

**m/z: 455.25 (100.0%), 456.26 (26.5%), 457.26 (4.2%), 456.25 (1.8%)**

**Elemental Analysis: C, 63.28; H, 7.30; N, 15.37; O, 14.05**

ESI : [M+H] 456.3

### Display Report

#### Analysis Info

Analysis Name XZ3-1070.d  
Method XQ Default.ms  
Sample Name XZH3-107  
Comment Diluted 1/100 in MEOH.

Acquisition Date 03/10/09 14:47:03  
Operator Administrator  
Instrument Esquire-LC\_00137

#### Acquisition Parameter

|                   |             |              |            |                          |            |
|-------------------|-------------|--------------|------------|--------------------------|------------|
| Ion Source Type   | ESI         | Ion Polarity | Positive   | Alternating Ion Polarity | n/a        |
| Mass Range Mode   | Std/Normal  | Scan Begin   | 150.00 m/z | Scan End                 | 600.00 m/z |
| Capillary Exit    | 83.6 Volt   | Skim 1       | 16.3 Volt  | Trap Drive               | 35.4       |
| Accumulation Time | 851 $\mu$ s | Averages     | 20 Spectra | Auto MS/MS               | Off        |

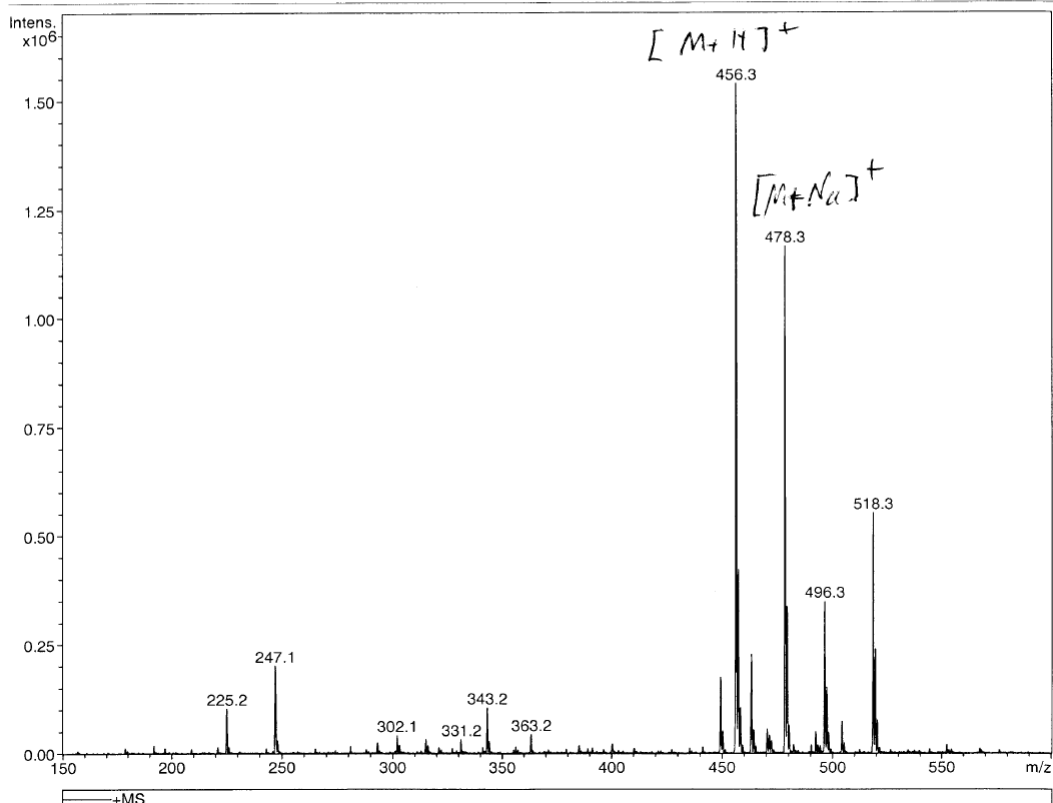

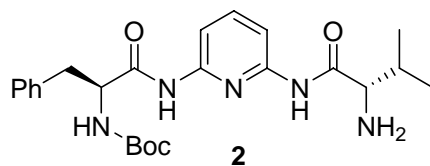

## HRMS

Calculated mass H<sup>+</sup> 456.2611

Measured mass 456.2604

1.5 ppm

Copy (2) of O041409E\_090414115914 #1-10 RT: 0.00-0.22 AV: 10 NL: 4.01E7  
T: FTMS + p ESI Full ms [100.00-1000.00]

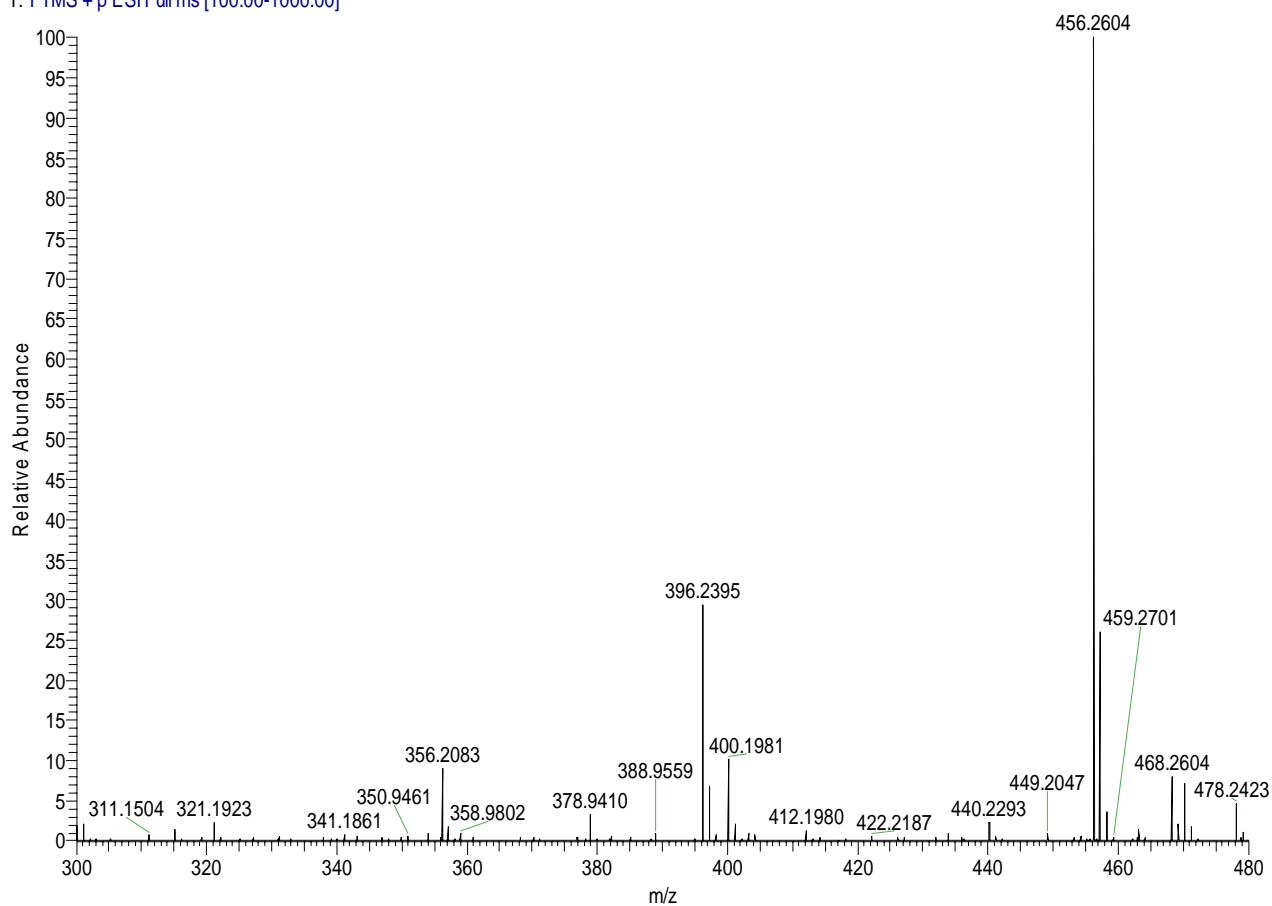

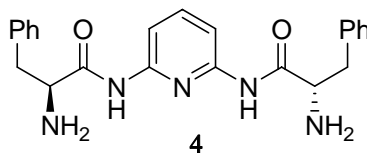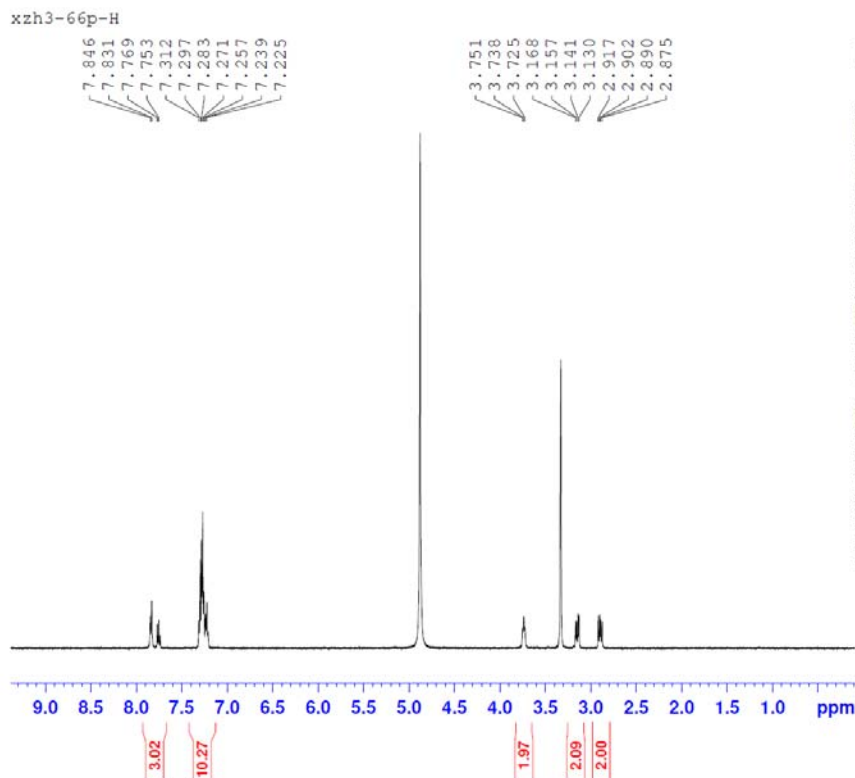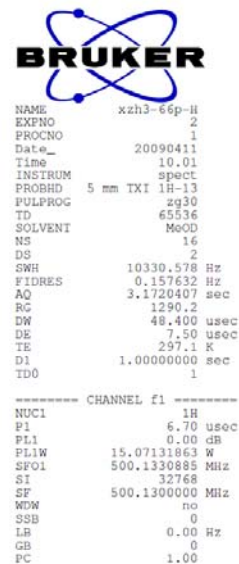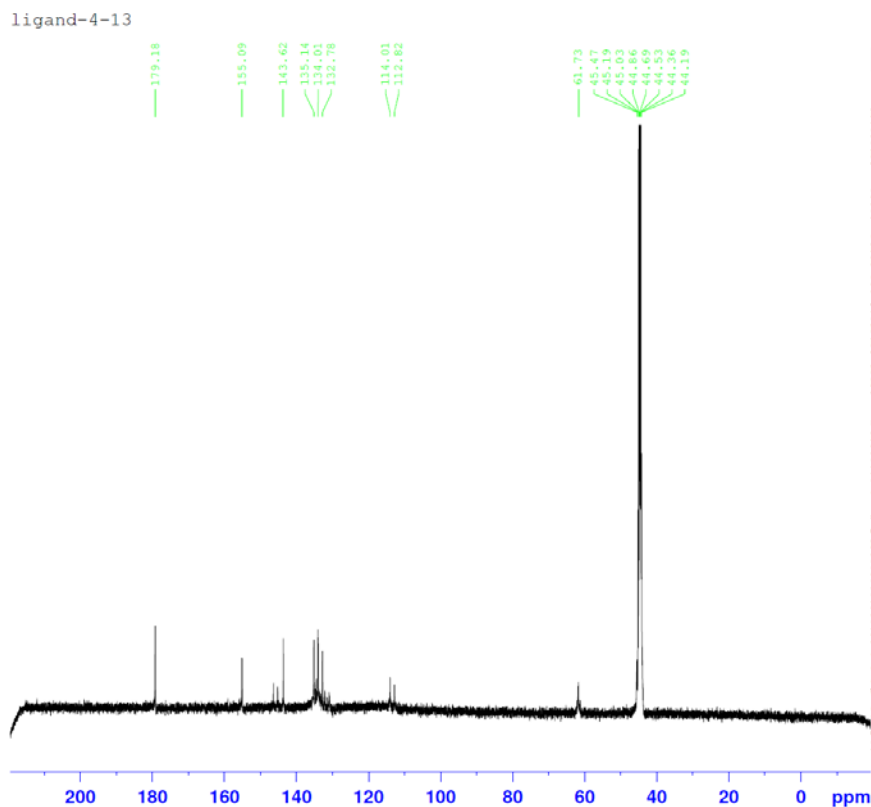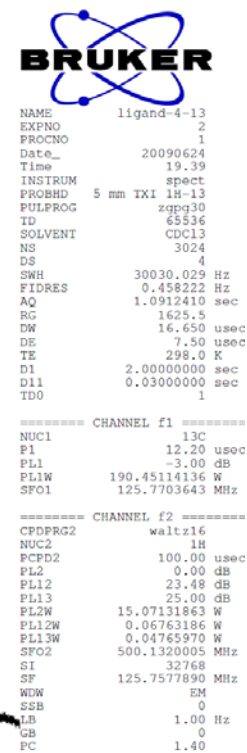

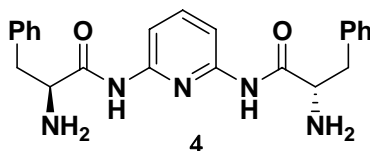

**Chemical Formula:** C<sub>23</sub>H<sub>25</sub>N<sub>5</sub>O<sub>2</sub>  
**Exact Mass:** 403.2  
**Molecular Weight:** 403.48  
**m/z:** 403.20 (100.0%), 404.20 (26.7%), 405.21 (3.5%)  
**Elemental Analysis:** C, 68.47; H, 6.25; N, 17.36; O, 7.93

ESI: [M+H]<sup>+</sup> 404.3

### Display Report

#### Analysis Info

Analysis Name xzh36610.d  
Method NOVAKS.M  
Sample Name XZH3-66-1  
Comment Diluted 1/100 in MEOH

Acquisition Date 02/05/09 09:52:58  
Operator Administrator  
Instrument Esquire-LC\_00137

#### Acquisition Parameter

|                   |             |              |            |                          |            |
|-------------------|-------------|--------------|------------|--------------------------|------------|
| Ion Source Type   | ESI         | Ion Polarity | Positive   | Alternating Ion Polarity | n/a        |
| Mass Range Mode   | Std/Normal  | Scan Begin   | 150.00 m/z | Scan End                 | 700.00 m/z |
| Capillary Exit    | 87.4 Volt   | Skim 1       | 19.4 Volt  | Trap Drive               | 31.2       |
| Accumulation Time | 519 $\mu$ s | Averages     | 20 Spectra | Auto MS/MS               | Off        |

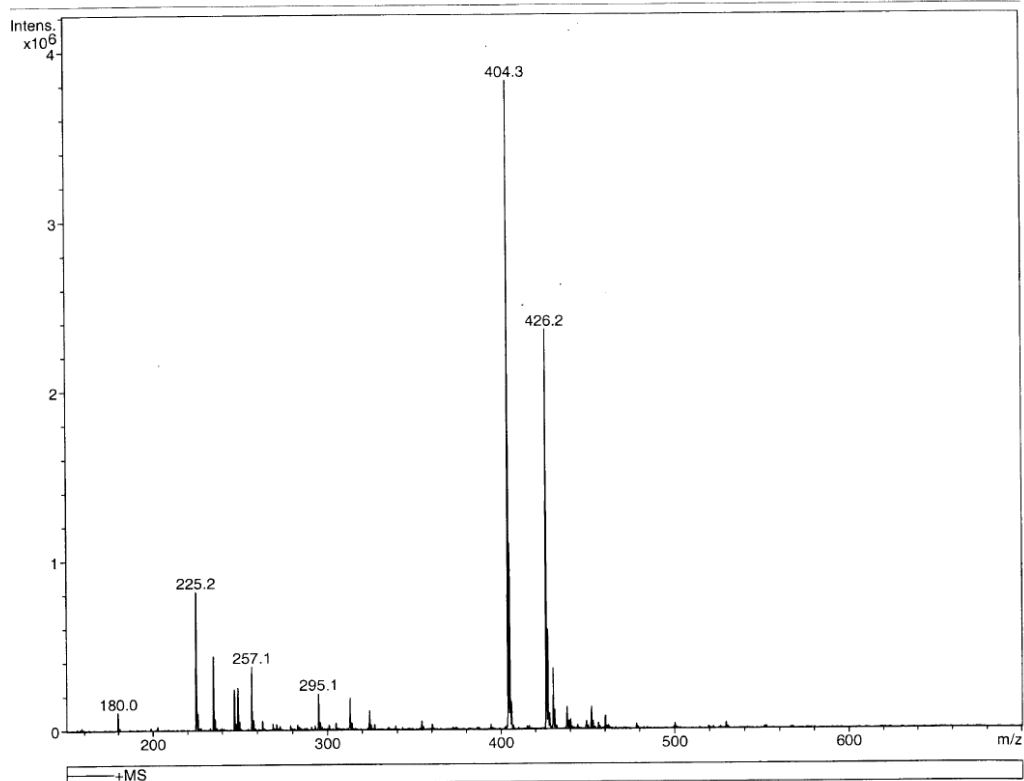

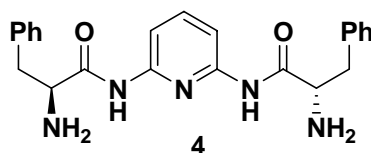

## HRMS

Calculated mass H<sup>+</sup> 404.2086

Measured mass 404.2079

1.7 ppm

Copy (2) of O041409C #1 RT: 0.01 AV: 1 NL: 3.23E8  
T: FTMS + p ESI Full ms [100.00-1000.00]

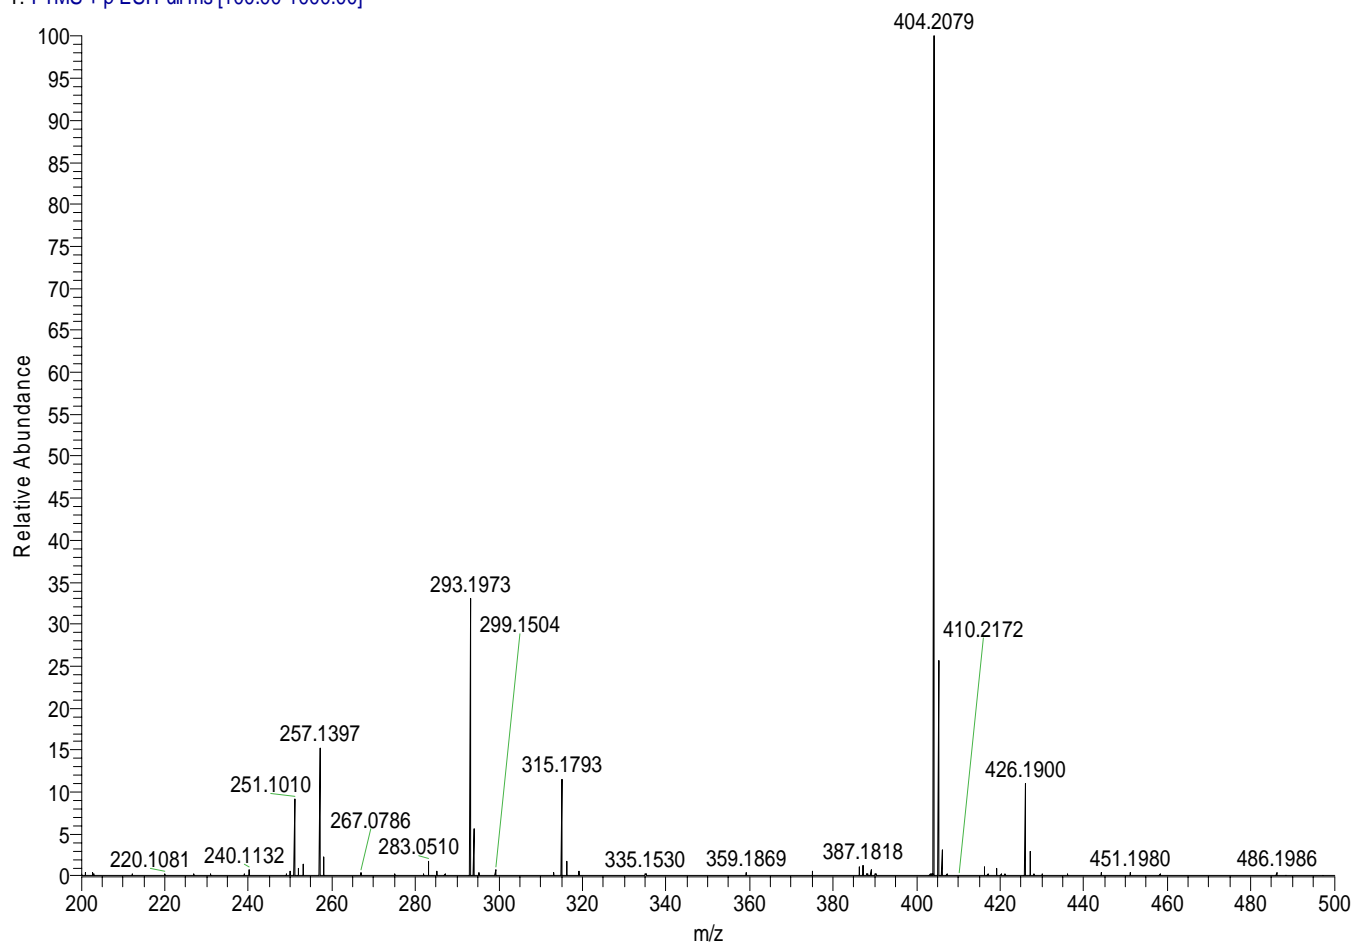

### HPLC spectra for the aldol products

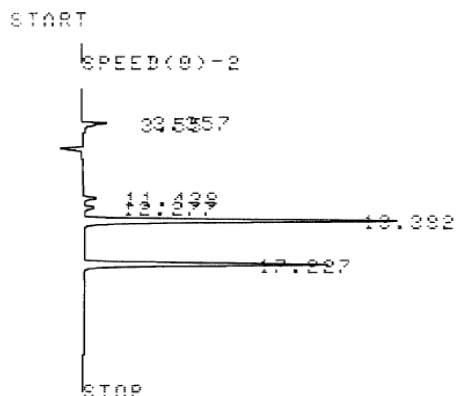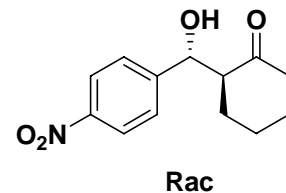

```

CHROMATOPAC  C-R6A          FILE          0
SAMPLE NO     0             METHOD         41
REPORT NO    668
    
```

| PKNO  | TIME   | AREA   | MK | IDNO | CONC    | NAME |
|-------|--------|--------|----|------|---------|------|
| 1     | 13.382 | 211920 |    |      | 49.9463 |      |
| 2     | 17.227 | 212376 |    |      | 50.0537 |      |
| TOTAL |        | 424296 |    |      | 100     |      |

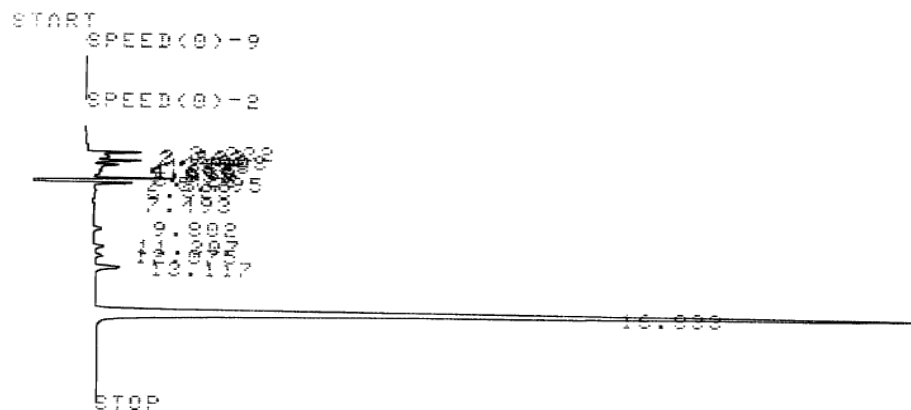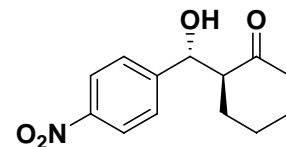

```

CHROMATOPAC  C-R6A          FILE          0
SAMPLE NO     0             METHOD         41
REPORT NO    656
    
```

| PKNO  | TIME   | AREA    | MK | IDNO | CONC    | NAME |
|-------|--------|---------|----|------|---------|------|
| 1     | 3.332  | 19999   |    |      | 1.9392  |      |
| 2     | 3.622  | 11868   | V  |      | 1.1507  |      |
| 3     | 3.763  | 20010   | V  |      | 1.9402  |      |
| 4     | 4.000  | 42302   | V  |      | 4.1019  |      |
| 5     | 4.338  | 53533   | V  |      | 5.1908  |      |
| 6     | 4.655  | 19592   | V  |      | 1.8997  |      |
| 7     | 4.815  | 49870   | V  |      | 4.8356  |      |
| 8     | 5.000  | 50700   | V  |      | 5.0155  |      |
| 9     | 5.420  | 56375   | V  |      | 5.4664  |      |
| 10    | 5.795  | 48934   | E  |      | 4.7449  |      |
| 11    | 10.117 | 16132   |    |      | 1.5643  |      |
| 12    | 16.883 | 609905  |    |      | 61.9509 |      |
| TOTAL |        | 1031300 |    |      | 100     |      |



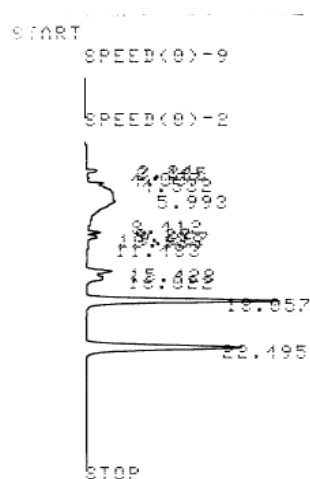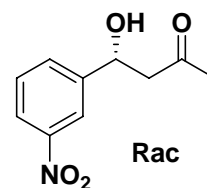

CHROMATOPAC C-R6A  
 SAMPLE NO 0  
 REPORT NO 687

FILE 0  
 METHOD 41

| PKNO  | TIME   | AREA   | MK | IDNO | CONC    | NAME |
|-------|--------|--------|----|------|---------|------|
| 1     | 5.993  | 147740 | V  |      | 25.6636 |      |
| 2     | 9.27   | 11199  | V  |      | 1.9974  |      |
| 3     | 15.428 | 22791  |    |      | 3.9591  |      |
| 4     | 16.022 | 22750  | V  |      | 3.9519  |      |
| 5     | 18.057 | 185844 |    |      | 32.2827 |      |
| 6     | 22.495 | 185853 |    |      | 32.1453 |      |
| TOTAL |        | 575678 |    |      | 100     |      |

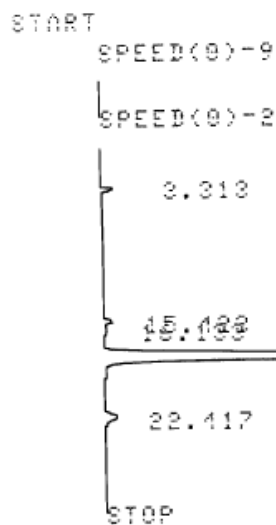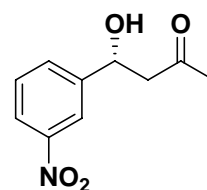

CHROMATOPAC C-R6A  
 SAMPLE NO 0  
 REPORT NO 689

FILE 0  
 METHOD 41

| PKNO  | TIME   | AREA   | MK | IDNO | CONC    | NAME |
|-------|--------|--------|----|------|---------|------|
| 1     | 17.995 | 471461 |    |      | 97.3467 |      |
| 2     | 22.417 | 12850  |    |      | 2.6532  |      |
| TOTAL |        | 484311 |    |      | 100     |      |

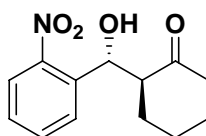

Rac

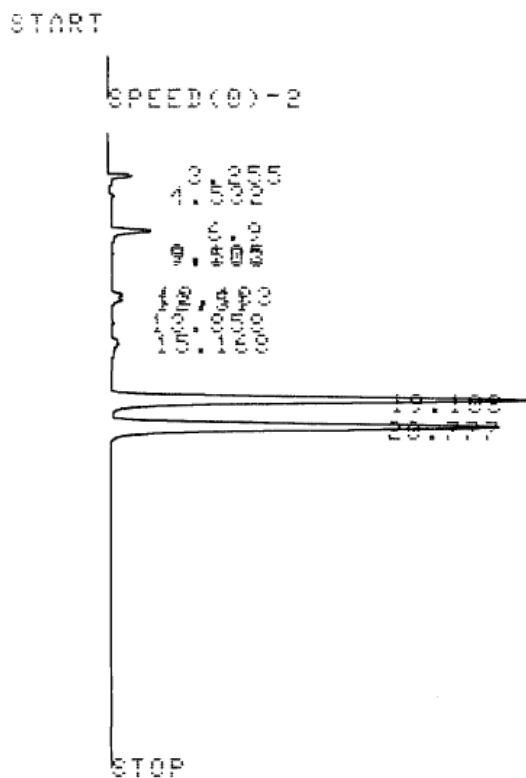

CHROMATOPAC C-R6A FILE 0  
 SAMPLE NO 0 METHOD 41  
 REPORT NO 670

| PKNO        | TIME   | AREA   | MK | IDNO | CONC    | NAME |
|-------------|--------|--------|----|------|---------|------|
| 1           | 6.9    | 24014  |    |      | 3.549   |      |
| 2           | 19.108 | 326167 |    |      | 48.2038 |      |
| 3           | 20.777 | 326462 | Y  |      | 48.2473 |      |
| ----- TOTAL |        | 676643 |    |      | 100     |      |

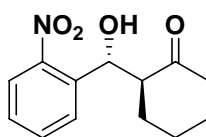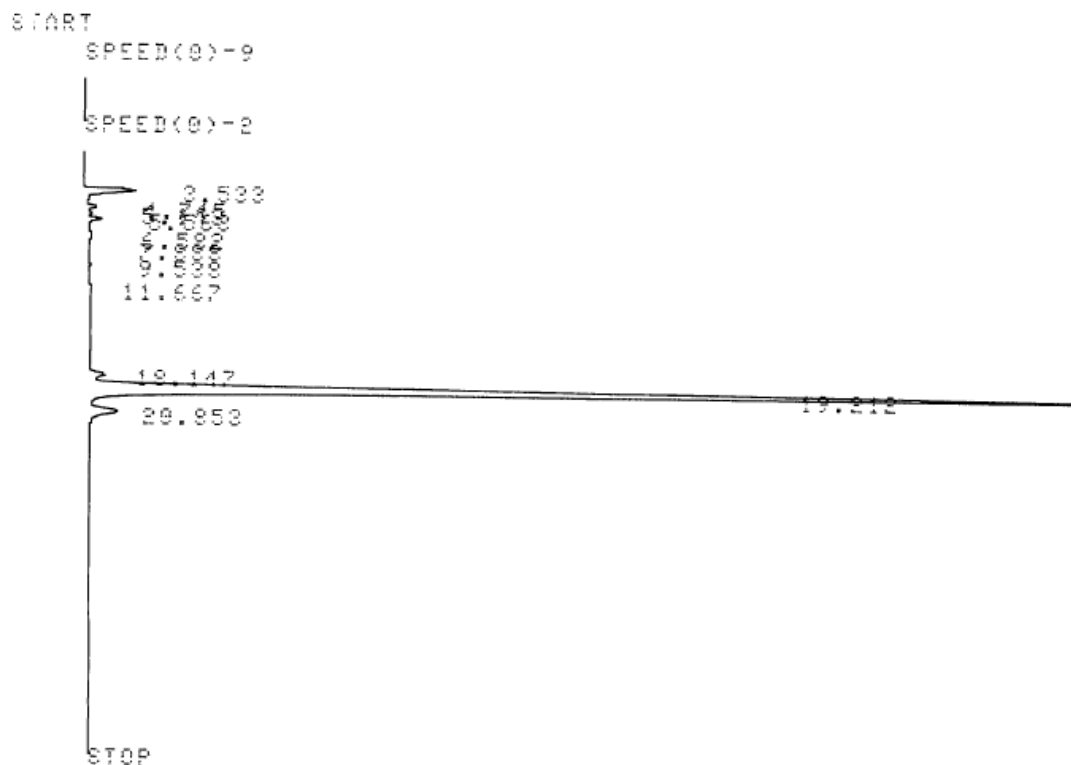

CHROMATOPAC C-R6A  
 SAMPLE NO 0  
 REPORT NO 669

FILE 0  
 METHOD 41

| PKNO  | TIME   | AREA    | HK | IDNO | CONC    | NAME |
|-------|--------|---------|----|------|---------|------|
| 1     | 2.503  | 36752   |    |      | 3.4775  |      |
| 2     | 18.147 | 16656   |    |      | 1.576   |      |
| 3     | 19.212 | 972709  | V  |      | 92.0379 |      |
| 4     | 20.953 | 38739   | V  |      | 2.9085  |      |
| TOTAL |        | 1056856 |    |      | 100     |      |

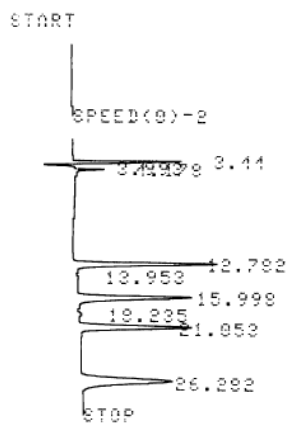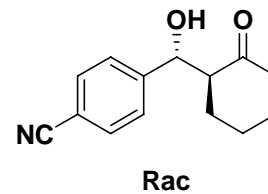

CHROMATOPAC C-R6A FILE 0  
 SAMPLE NO 0 METHOD 41  
 REPORT NO 706

| PKNO  | TIME   | AREA   | MK | IDNO | CONC    | NAME |
|-------|--------|--------|----|------|---------|------|
| 1     | 3.44   | 59875  |    |      | 18.4146 |      |
| 2     | 3.998  | 12367  |    |      | 2.1511  |      |
| 3     | 4.178  | 13935  | V  |      | 2.4238  |      |
| 4     | 12.782 | 108446 |    |      | 18.8663 |      |
| 5     | 15.998 | 112635 |    |      | 19.5916 |      |
| 6     | 21.053 | 133318 |    |      | 23.1892 |      |
| 7     | 26.282 | 134338 |    |      | 23.3666 |      |
| TOTAL |        | 574916 |    |      | 100     |      |

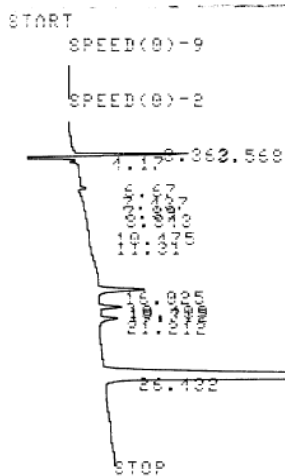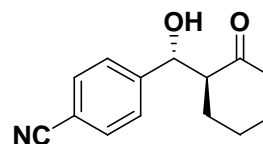

CHROMATOPAC C-R6A FILE 0  
 SAMPLE NO 0 METHOD 41  
 REPORT NO 707

| PKNO  | TIME   | AREA    | MK | IDNO | CONC    | NAME |
|-------|--------|---------|----|------|---------|------|
| 1     | 3.568  | 77985   | V  |      | 6.7236  |      |
| 2     | 4.17   | 22133   |    |      | 1.9082  |      |
| 3     | 10.475 | 20390   | V  |      | 1.758   |      |
| 4     | 11.31  | 13665   | V  |      | 1.1781  |      |
| 5     | 16.025 | 152124  | V  |      | 13.1155 |      |
| 6     | 18.408 | 58218   | V  |      | 5.0193  |      |
| 7     | 19.712 | 20603   | V  |      | 1.7763  |      |
| 8     | 21.212 | 32226   | V  |      | 2.7784  |      |
| 9     | 26.432 | 762534  | V  |      | 65.7426 |      |
| TOTAL |        | 1159878 |    |      | 100     |      |

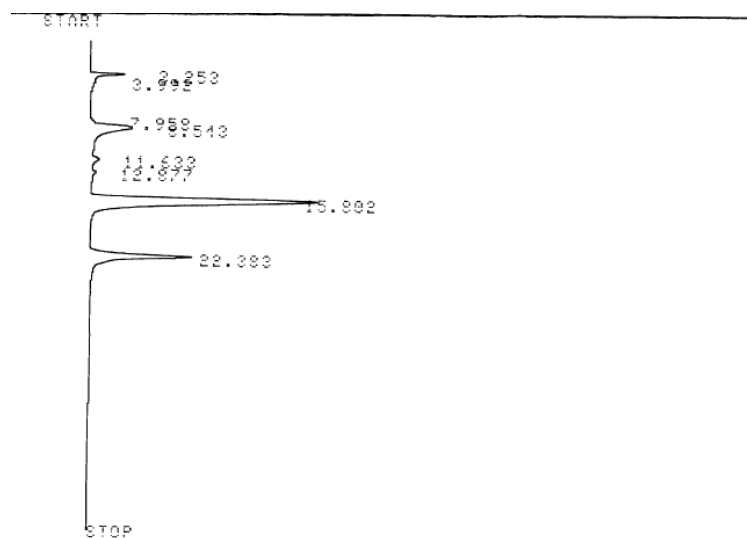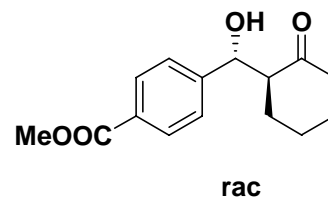

CHROMATOPAC C-R6A FILE @  
 SAMPLE NO 0 METHOD 41  
 REPORT NO 679

| PKNO  | TIME   | AREA    | MK | IDNO | CONC    | NAME |
|-------|--------|---------|----|------|---------|------|
| 1     | 3.253  | 21175   |    |      | 2.0307  |      |
| 2     | 8.543  | 85956   | V  |      | 9.2433  |      |
| 3     | 11.633 | 10270   |    |      | 0.9819  |      |
| 4     | 15.892 | 463386  |    |      | 44.4393 |      |
| 5     | 22.383 | 161951  |    |      | 14.3017 |      |
| TOTAL |        | 1042739 |    |      | 100     |      |

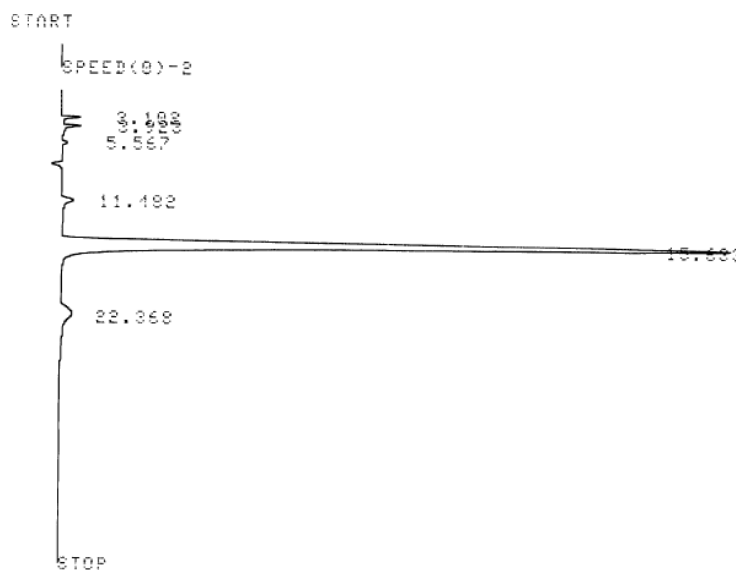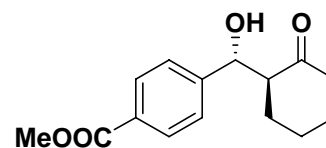

CHROMATOPAC C-R6A FILE @  
 SAMPLE NO 0 METHOD 41  
 REPORT NO 678

| PKNO  | TIME   | AREA    | MK | IDNO | CONC    | NAME |
|-------|--------|---------|----|------|---------|------|
| 1     | 3.923  | 10589   |    |      | 0.7645  |      |
| 2     | 11.492 | 13911   |    |      | 1.0043  |      |
| 3     | 15.833 | 1306357 |    |      | 94.3141 |      |
| 4     | 22.368 | 54256   |    |      | 3.9171  |      |
| TOTAL |        | 1385113 |    |      | 100     |      |

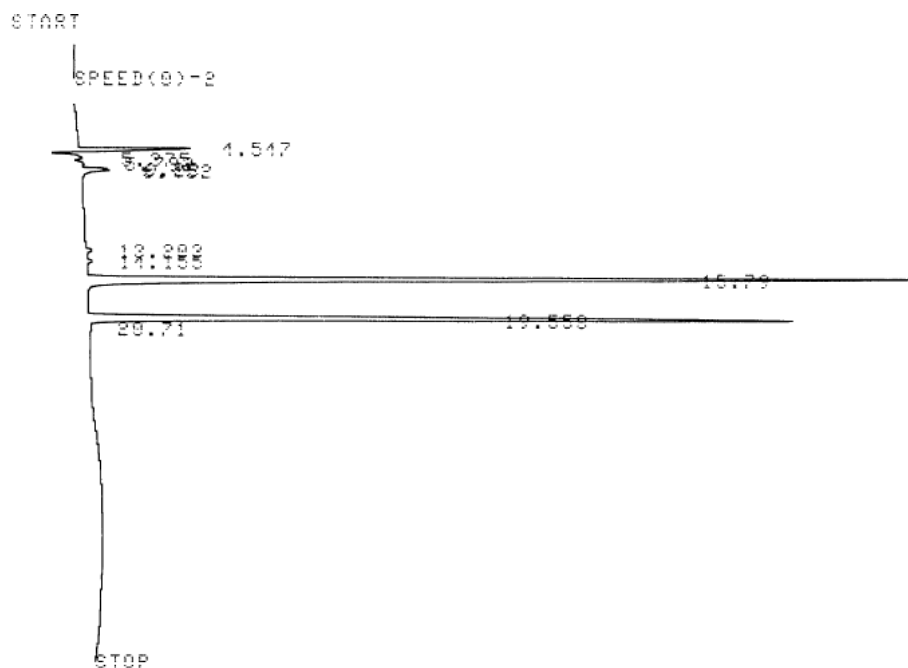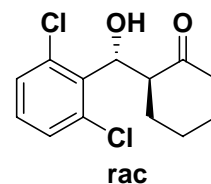

CHROMATOPAC C-R6A FILE 0  
 SAMPLE NO 0 METHOD 41  
 REPORT NO 710

| PKNO  | TIME   | AREA    | MK | IDNO | CONC    | NAME |
|-------|--------|---------|----|------|---------|------|
| 1     | 4.547  | 70660   |    |      | 1.5366  |      |
| 2     | 5.075  | 29717   |    |      | 1.3078  |      |
| 3     | 5.798  | 17500   | Y  |      | 1.1234  |      |
| 4     | 6.288  | 20678   | Y  |      | 1.3275  |      |
| 5     | 6.452  | 23924   | Y  |      | 1.5294  |      |
| 6     | 15.79  | 698905  |    |      | 14.8673 |      |
| 7     | 19.558 | 696422  |    |      | 14.7079 |      |
| TOTAL |        | 1557714 |    |      | 100     |      |

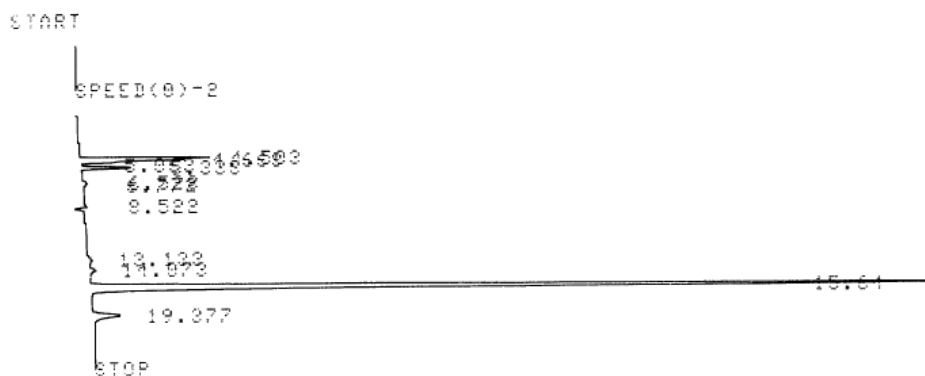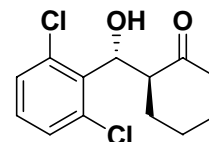

CHROMATOPAC C-R6A FILE 0  
 SAMPLE NO 0 METHOD 41  
 REPORT NO 712

| PKNO  | TIME   | AREA   | MK | IDNO | CONC    | NAME |
|-------|--------|--------|----|------|---------|------|
| 1     | 4.503  | 41047  |    |      | 4.9297  |      |
| 2     | 4.688  | 52105  | SV |      | 6.0137  |      |
| 3     | 5.333  | 25378  | Y  |      | 3.929   |      |
| 4     | 15.61  | 719553 |    |      | 92.9311 |      |
| 5     | 19.377 | 28562  |    |      | 3.2964  |      |
| TOTAL |        | 866446 |    |      | 100     |      |

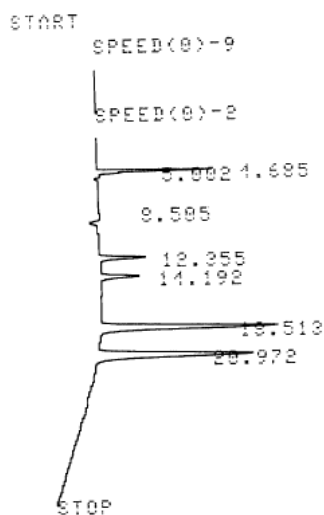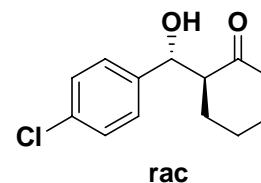

CHROMATOPAD C-R60  
 SAMPLE NO 0  
 REPORT NO 791

FILE 0  
 METHOD 41

| PKNO  | TIME   | AREA   | MK | IDNO | CONC    | NAME |
|-------|--------|--------|----|------|---------|------|
| 1     | 4.695  | 51369  |    |      | 11.9924 |      |
| 2     | 12.355 | 29052  |    |      | 6.7822  |      |
| 3     | 14.192 | 28574  |    |      | 6.6707  |      |
| 4     | 18.513 | 159207 |    |      | 37.1674 |      |
| 5     | 20.972 | 160149 |    |      | 37.3873 |      |
| TOTAL |        | 498351 |    |      | 100     |      |

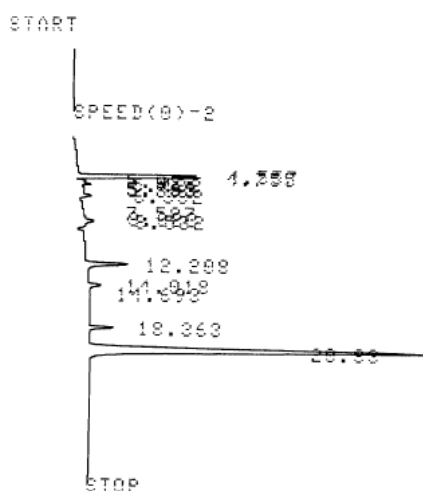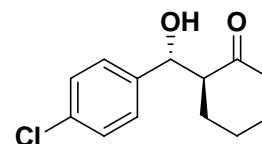

CHROMATOPAD C-R60  
 SAMPLE NO 0  
 REPORT NO 790

FILE 0  
 METHOD 41

| PKNO  | TIME   | AREA   | MK | IDNO | CONC    | NAME |
|-------|--------|--------|----|------|---------|------|
| 1     | 4.557  | 38258  |    |      | 7.3458  |      |
| 2     | 4.755  | 51485  | Y  |      | 9.8876  |      |
| 3     | 8.532  | 17355  | Y  |      | 3.333   |      |
| 4     | 12.208 | 28311  |    |      | 5.4371  |      |
| 5     | 14.019 | 10003  |    |      | 1.9211  |      |
| 6     | 18.363 | 23598  |    |      | 4.5319  |      |
| 7     | 20.83  | 351701 |    |      | 67.5434 |      |
| TOTAL |        | 520704 |    |      | 100     |      |

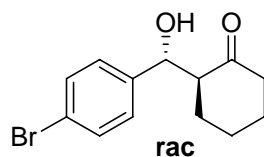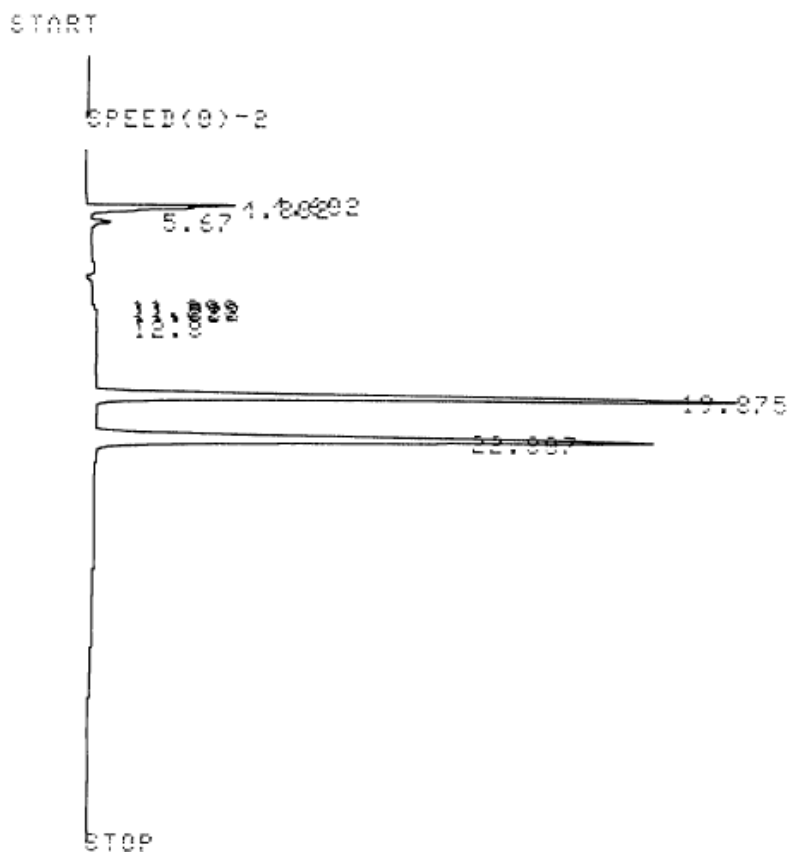

CHROMATOPAC C-R6A  
 SAMPLE NO 0  
 REPORT NO 702

FILE 0  
 METHOD 41

| PKNO  | TIME   | AREA    | MK | IDNO | CONC    | NAME |
|-------|--------|---------|----|------|---------|------|
| 1     | 4.682  | 13119   |    |      | 4.0085  |      |
| 2     | 4.882  | 10923   | V  |      | 3.7925  |      |
| 3     | 19.875 | 193750  |    |      | 45.8694 |      |
| 4     | 22.887 | 198704  |    |      | 46.3296 |      |
| TOTAL |        | 1076426 |    |      | 100     |      |



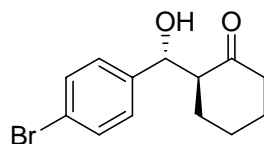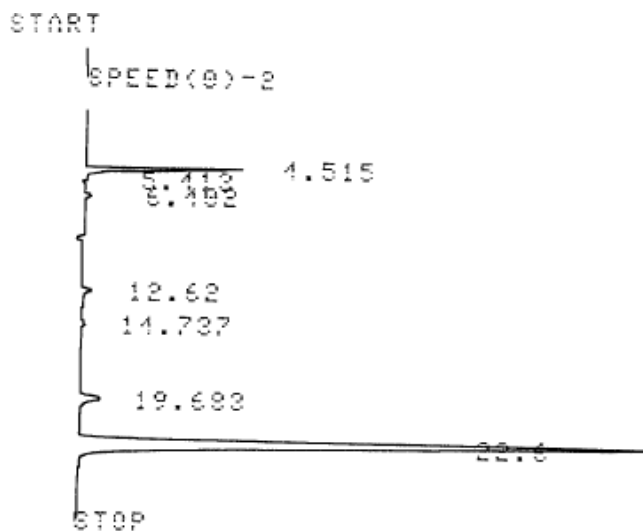

CHROMATOPAC C-R6A  
 SAMPLE NO 0  
 REPORT NO 704

FILE 0  
 METHOD 41

| PKNO  | TIME   | AREA   | MK | IDNO | CONC    | NAME |
|-------|--------|--------|----|------|---------|------|
| 1     | 4.515  | 71376  |    |      | 12.3619 |      |
| 2     | 19.693 | 14693  |    |      | 2.5429  |      |
| 3     | 22.6   | 491324 |    |      | 95.0951 |      |
| TOTAL |        | 577393 |    |      | 100     |      |

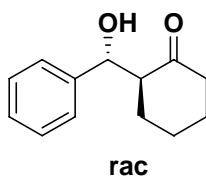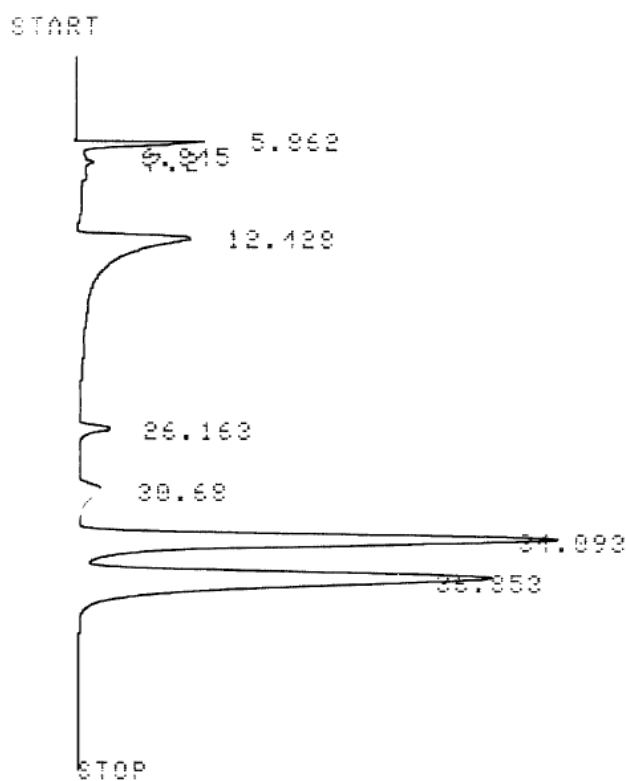

CHROMATOPAC C-R60  
 SAMPLE NO 0  
 REPORT NO 730

FILE 0  
 METHOD 41

| PKNO  | TIME   | AREA    | MK | IDNO | CONC    | NAME |
|-------|--------|---------|----|------|---------|------|
| 1     | 5.862  | 80346   |    |      | 3.6093  |      |
| 2     | 12.428 | 281038  |    |      | 12.6247 |      |
| 3     | 26.163 | 49050   |    |      | 2.2034  |      |
| 4     | 30.68  | 51929   |    |      | 2.3283  |      |
| 5     | 34.093 | 880474  | Y  |      | 39.5525 |      |
| 6     | 36.853 | 883354  | Y  |      | 39.6018 |      |
| TOTAL |        | 2226091 |    |      | 100     |      |

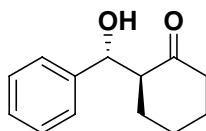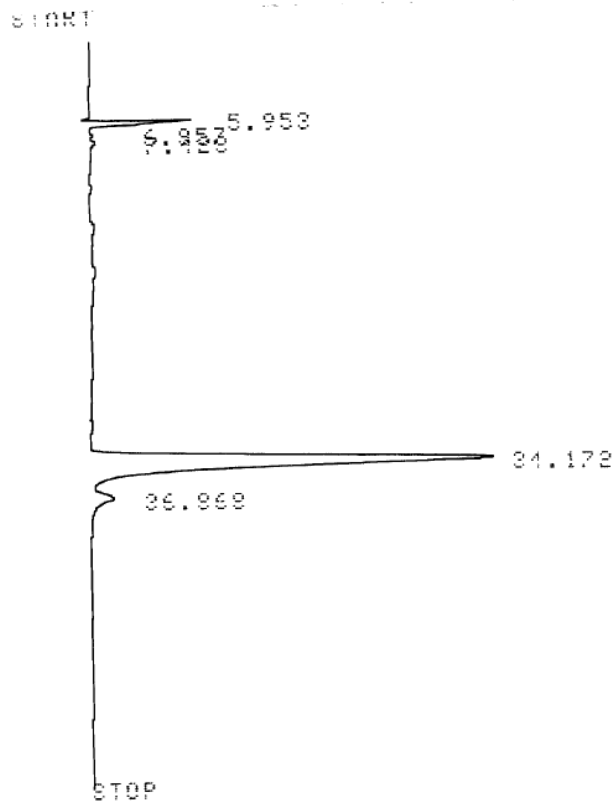

CHROMATOPAC C-R6A  
SAMPLE NO 0  
REPORT NO 729

FILE 0  
METHOD 41

| PKNO  | TIME   | AREA   | MK | IDNO | CONC    | NAME |
|-------|--------|--------|----|------|---------|------|
| 1     | 5.953  | 56092  |    |      | 6.7365  |      |
| 2     | 34.172 | 724203 |    |      | 86.9744 |      |
| 3     | 36.868 | 52367  | Y  |      | 6.2892  |      |
| TOTAL |        | 832662 |    |      | 100     |      |

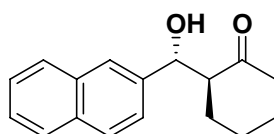

rac

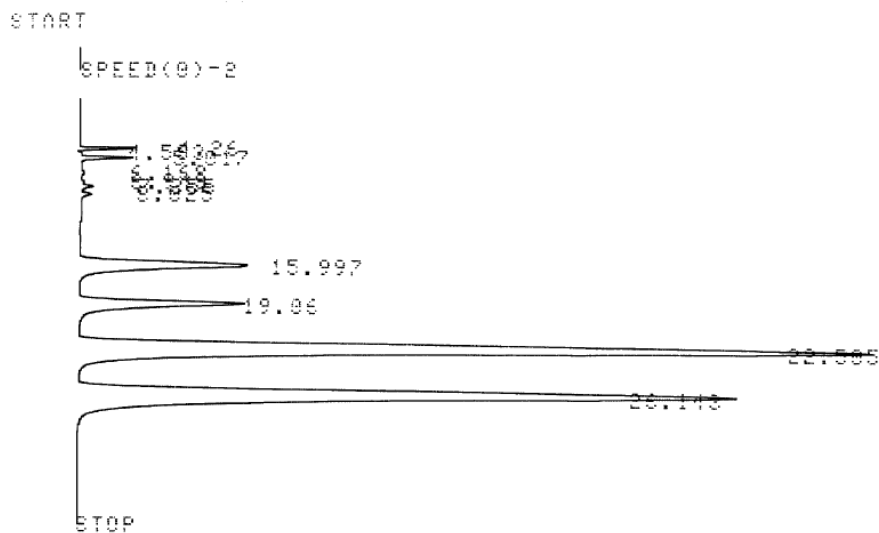

CHROMATOPAC C-R60 FILE 0  
 SAMPLE NO 0 METHOD 41  
 REPORT NO 718

| PKNO  | TIME   | AREA    | MK | IDNO | CONC    | NAME |
|-------|--------|---------|----|------|---------|------|
| 1     | 4.26   | 22557   |    |      | 0.7065  |      |
| 2     | 5.017  | 24101   | Y  |      | 0.7558  |      |
| 3     | 15.997 | 229328  |    |      | 7.4963  |      |
| 4     | 19.06  | 248276  |    |      | 7.7767  |      |
| 5     | 22.505 | 1031213 |    |      | 41.6972 |      |
| 6     | 26.143 | 1327073 | Y  |      | 41.5675 |      |
| TOTAL |        | 3192576 |    |      | 100     |      |

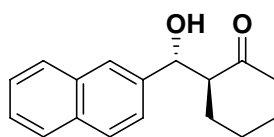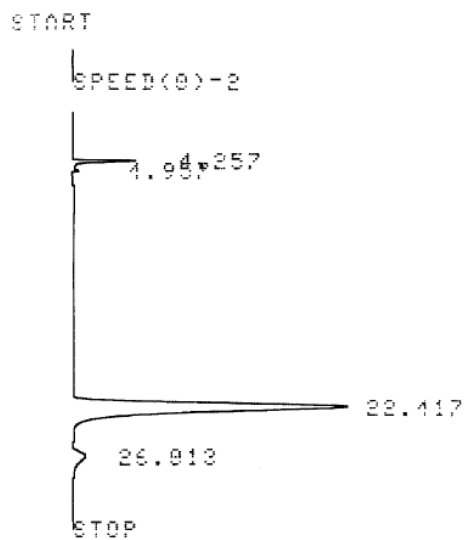

CHROMATOPOAD C-R60  
SAMPLE NO 0  
REPORT NO 720

FILE 0  
METHOD 41

| PKNO  | TIME   | AREA   | PK | IDNO | CONC    | NAME |
|-------|--------|--------|----|------|---------|------|
| 1     | 4.257  | 23115  |    |      | 4.9699  |      |
| 2     | 22.417 | 419224 |    |      | 90.1159 |      |
| 3     | 26.013 | 22867  |    |      | 4.9154  |      |
|       |        | -----  |    |      | -----   |      |
| TOTAL |        | 465206 |    |      | 100     |      |

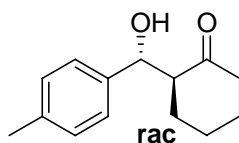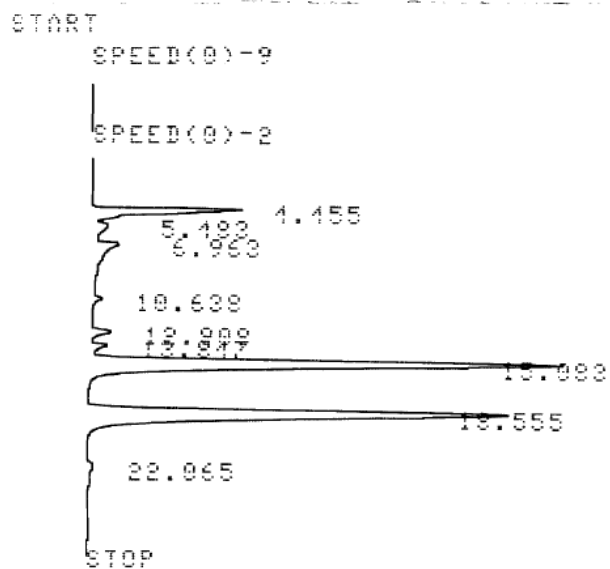

CHROMATOPAC C-R6A  
 SAMPLE NO 0  
 REPORT NO 723

FILE 0  
 METHOD 41

| PKNO  | TIME   | AREA    | MK | IDNO | CONC    | NAME |
|-------|--------|---------|----|------|---------|------|
| 1     | 4.455  | 119907  |    |      | 9.4985  |      |
| 2     | 5.483  | 13218   | V  |      | 1.0559  |      |
| 3     | 6.963  | 34881   |    |      | 2.7863  |      |
| 4     | 12.908 | 16297   |    |      | 1.3018  |      |
| 5     | 13.847 | 16019   | V  |      | 1.2796  |      |
| 6     | 15.083 | 524967  | V  |      | 41.925  |      |
| 7     | 18.555 | 527569  |    |      | 42.1428 |      |
| TOTAL |        | 1251859 |    |      | 100     |      |

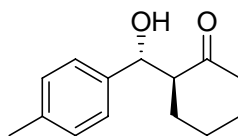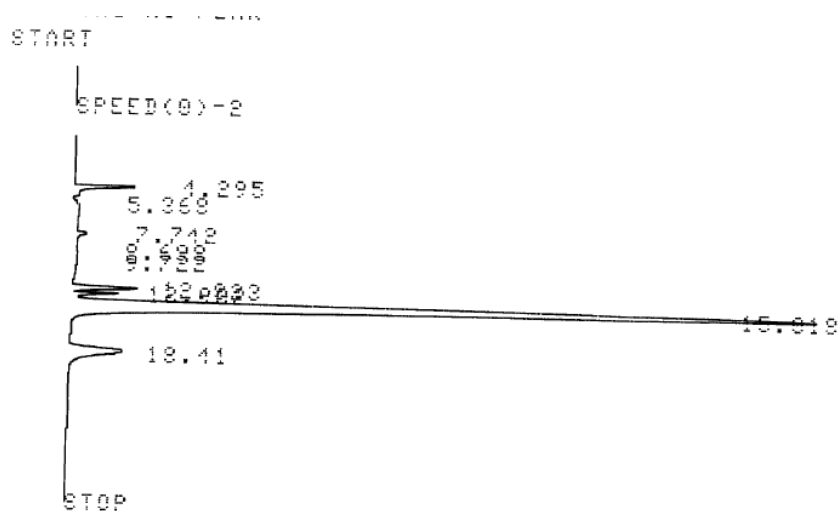

CHROMATOPAC C-REA  
 SAMPLE NO 9  
 REPORT NO 724

FILE 0  
 METHOD 41

| PKNO  | TIME   | AREA   | MK | IDNO | CONC    | NAME |
|-------|--------|--------|----|------|---------|------|
| 1     | 1.295  | 29546  |    |      | 2.9225  |      |
| 2     | 12.823 | 57301  |    |      | 5.8665  |      |
| 3     | 13.902 | 45167  | V  |      | 4.6242  |      |
| 4     | 15.018 | 773995 | V  |      | 79.2424 |      |
| 5     | 19.41  | 71735  |    |      | 7.3443  |      |
| TOTAL |        | 976743 |    |      | 100     |      |

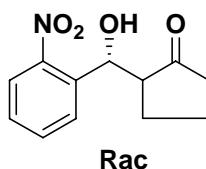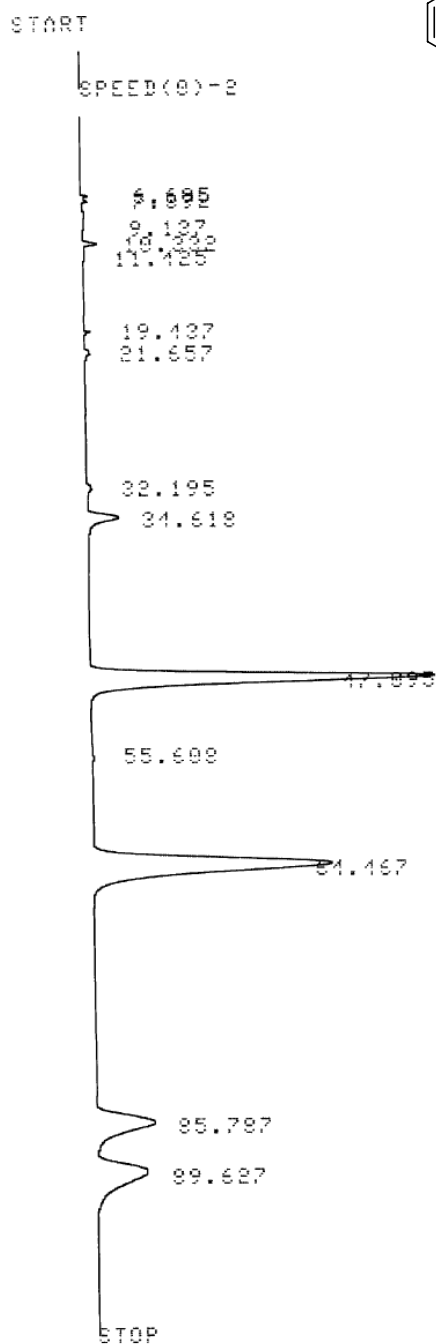

CHROMATOPAC C-REA  
 SAMPLE NO 8  
 REPORT NO 769

FILE 8  
 METHOD 41

| PKNO  | TIME   | AREA    | MK | IDNO | CONC    | NAME |
|-------|--------|---------|----|------|---------|------|
| 1     | 34.618 | 44124   |    |      | 2.526   |      |
| 2     | 47.095 | 643404  |    |      | 36.8327 |      |
| 3     | 64.467 | 663279  |    |      | 37.9706 |      |
| 4     | 85.787 | 196757  |    |      | 11.2637 |      |
| 5     | 89.627 | 199261  | Y  |      | 11.407  |      |
| TOTAL |        | 1746925 |    |      | 100     |      |



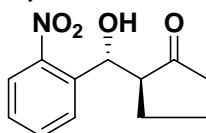

anti/syn = 3/1

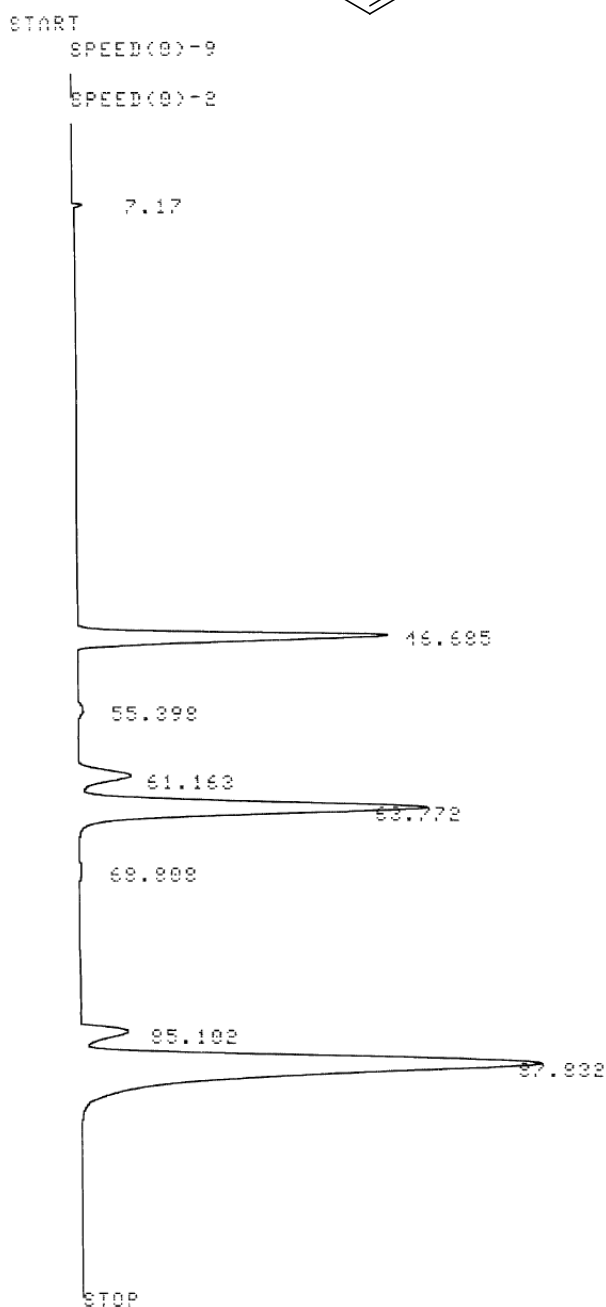

CHROMATOPAC C-R6A  
SAMPLE NO 0  
REPORT NO 767

FILE 0  
METHOD 41

| PKNO  | TIME   | AREA    | MK | IDNO | CONC    | NAME |
|-------|--------|---------|----|------|---------|------|
| 1     | 46.685 | 619529  |    |      | 15.9314 |      |
| 2     | 55.398 | 10958   |    |      | 0.2816  |      |
| 3     | 61.163 | 135694  |    |      | 3.4894  |      |
| 4     | 63.772 | 977931  | V  |      | 25.1478 |      |
| 5     | 69.808 | 11788   | V  |      | 0.3001  |      |
| 6     | 85.102 | 170504  |    |      | 4.3846  |      |
| 7     | 87.832 | 1962339 | V  |      | 50.4622 |      |
| TOTAL |        | 3888734 |    |      | 100     |      |

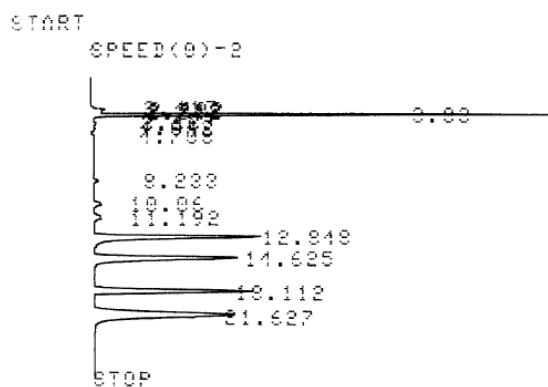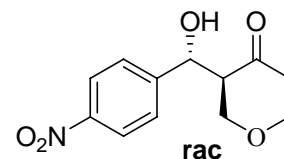

CHROMATOPAC C-R6A FILE 0  
 SAMPLE NO 0 METHOD 41  
 REPORT NO 749

| PKNO  | TIME   | AREA   | MK | IDNO | CONC    | NAME |
|-------|--------|--------|----|------|---------|------|
| 1     | 3.00   | 130959 | V  |      | 18.102  |      |
| 2     | 12.848 | 125922 |    |      | 17.3918 |      |
| 3     | 14.625 | 119452 |    |      | 16.5114 |      |
| 4     | 18.112 | 170701 |    |      | 23.5958 |      |
| 5     | 21.627 | 176518 |    |      | 24.3994 |      |
| TOTAL |        | 723451 |    |      | 100     |      |

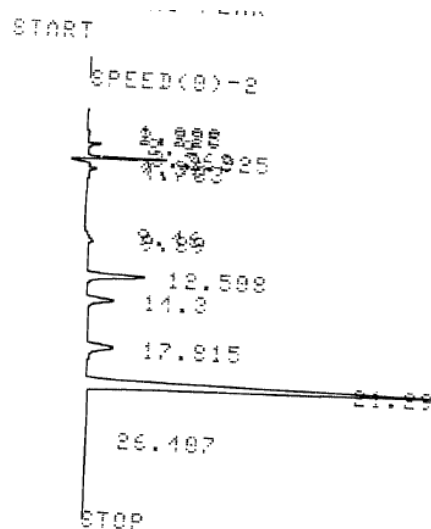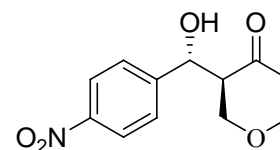

CHROMATOPAC C-R6A FILE 0  
 SAMPLE NO 0 METHOD 41  
 REPORT NO 747

| PKNO  | TIME   | AREA   | MK | IDNO | CONC    | NAME |
|-------|--------|--------|----|------|---------|------|
| 1     | 3.925  | 30000  | V  |      | 4.149   |      |
| 2     | 12.588 | 12363  |    |      | 8.4148  |      |
| 3     | 14.3   | 21435  |    |      | 4.2578  |      |
| 4     | 17.815 | 27245  |    |      | 5.4119  |      |
| 5     | 21.29  | 391508 |    |      | 77.7665 |      |
| TOTAL |        | 503440 |    |      | 100     |      |

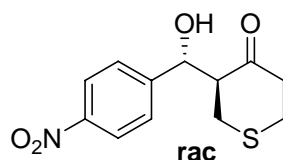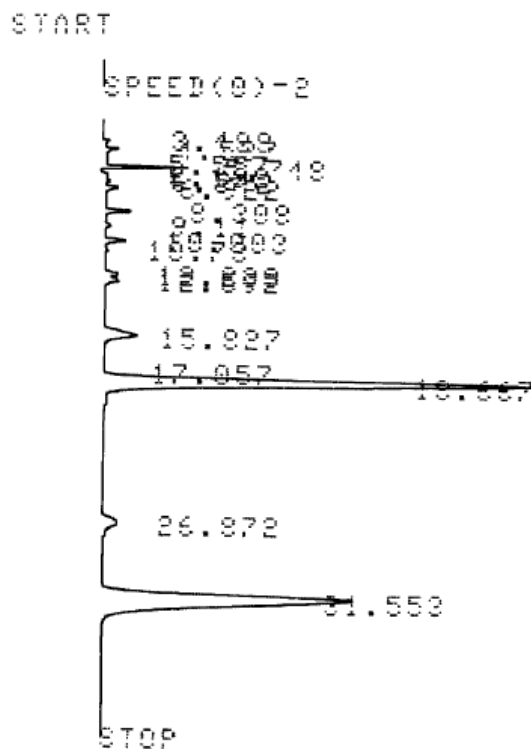

CHROMATOPAC C-R6A  
 SAMPLE NO 0  
 REPORT NO 753

FILE 0  
 METHOD 41

| PKNO  | TIME   | AREA   | MK | IDNO | CONC    | NAME |
|-------|--------|--------|----|------|---------|------|
| 1     | 5.748  | 17655  | Y  |      | 2.5534  |      |
| 2     | 15.827 | 26467  |    |      | 3.8279  |      |
| 3     | 18.667 | 312731 | Y  |      | 45.2312 |      |
| 4     | 26.872 | 17706  |    |      | 2.5608  |      |
| 5     | 31.553 | 316947 |    |      | 45.8266 |      |
| TOTAL |        | 691405 |    |      | 100     |      |

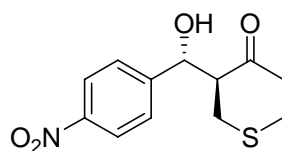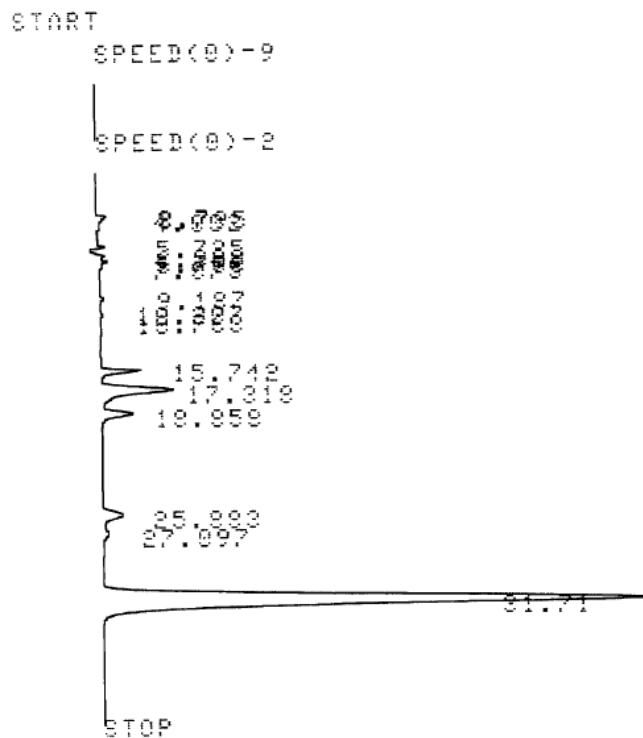

CHROMATOPAC C-R60  
 SAMPLE NO 0  
 REPORT NO 754

FILE 0  
 METHOD 41

| PKNO  | TIME   | AREA   | MK | IDNO | CONC    | NAME |
|-------|--------|--------|----|------|---------|------|
| 1     | 15.742 | 38206  |    |      | 4.0566  |      |
| 2     | 17.319 | 77402  | Y  |      | 9.2193  |      |
| 3     | 18.958 | 26947  | Y  |      | 2.8611  |      |
| 4     | 25.983 | 24076  |    |      | 2.5564  |      |
| 5     | 31.71  | 775196 |    |      | 92.3076 |      |
| TOTAL |        | 941916 |    |      | 100     |      |

T: 18.8 min / 31.7 min anti products (15.7, 17.3 syn products)

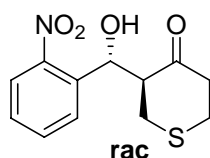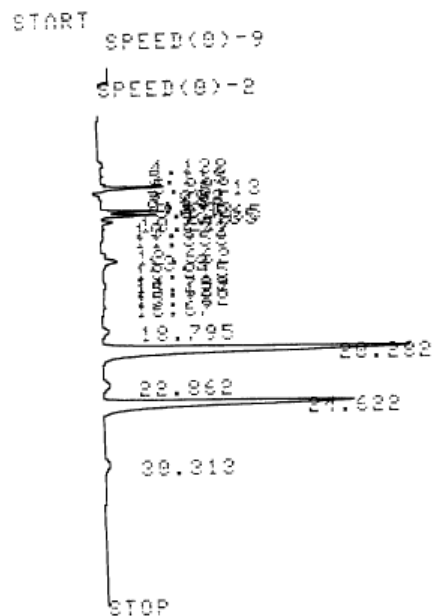

CHROMATOPAD C-R6A  
 SAMPLE NO 0  
 REPORT NO 862

FILE 0  
 METHOD 41

| PKNO  | TIME   | AREA   | MK | IDNO | CONC    | NAME |
|-------|--------|--------|----|------|---------|------|
| 1     | 6.10   | 29005  | V  |      | 3.8952  |      |
| 2     | 8.965  | 30695  | V  |      | 4.1222  |      |
| 3     | 9.435  | 35000  | V  |      | 4.7014  |      |
| 4     | 13.2   | 14550  | V  |      | 1.955   |      |
| 5     | 20.282 | 396737 |    |      | 41.1920 |      |
| 6     | 22.862 | 10607  |    |      | 1.4252  |      |
| 7     | 24.622 | 307535 |    |      | 41.3999 |      |
| 8     | 30.313 | 10413  |    |      | 1.3900  |      |
| TOTAL |        | 744639 |    |      | 100     |      |

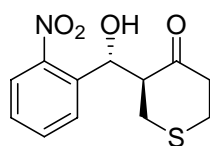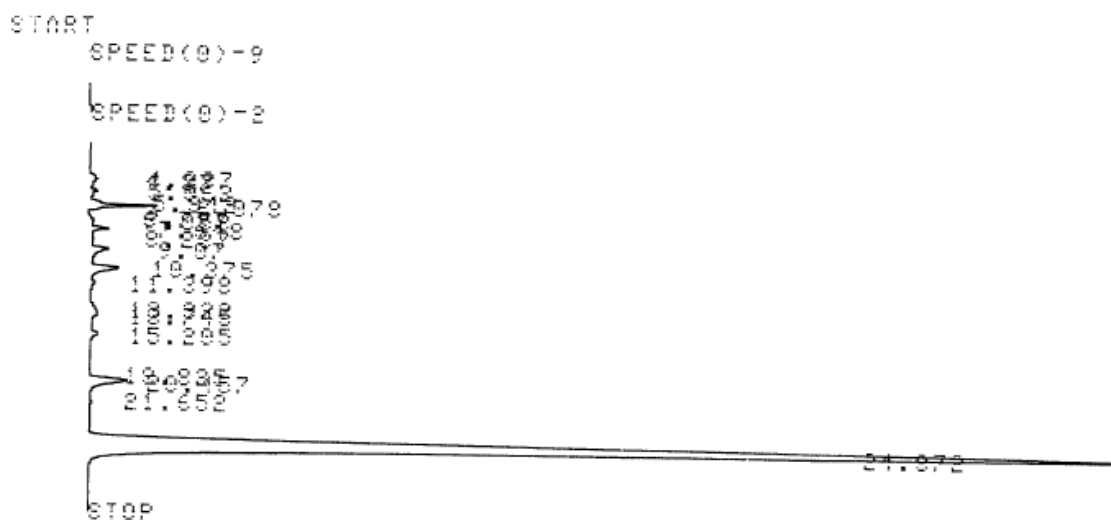

CHROMATOPAC C-R6A  
 SAMPLE NO 0  
 REPORT NO 867

FILE 0  
 METHOD 41

| PKNO  | TIME    | AREA    | MK | IDNO | CONC    | NAME |
|-------|---------|---------|----|------|---------|------|
| 1     | 6.6070  | 200156  | Y  |      | 2.2099  |      |
| 2     | 10.3700 | 207009  |    |      | 1.6251  |      |
| 3     | 20.157  | 35662   |    |      | 2.7991  |      |
| 4     | 24.872  | 1109510 |    |      | 92.3656 |      |
| TOTAL |         | 1271076 |    |      | 100     |      |

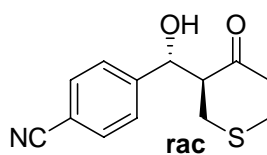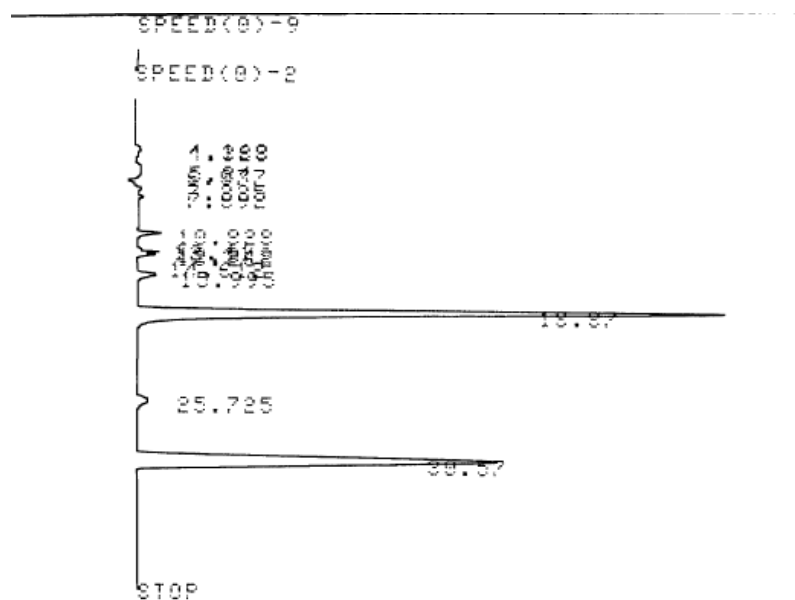

CHROMATOPAC C-R60 FILE 0  
 SAMPLE NO 0 METHOD 41  
 REPORT NO 868

| PKNO  | TIME   | AREA    | MK | IDNO | CONC    | NAME |
|-------|--------|---------|----|------|---------|------|
| 1     | 5.94   | 13791   |    |      | 1.0939  |      |
| 2     | 7.225  | 12900   |    |      | 1.0233  |      |
| 3     | 10.828 | 13005   |    |      | 1.1014  |      |
| 4     | 10.842 | 12535   | V  |      | 0.9943  |      |
| 5     | 10.262 | 14420   | V  |      | 1.1439  |      |
| 6     | 15.995 | 17112   |    |      | 1.3573  |      |
| 7     | 18.87  | 500209  |    |      | 46.0231 |      |
| 8     | 25.725 | 15772   |    |      | 1.251   |      |
| 9     | 30.57  | 500066  |    |      | 46.0119 |      |
| TOTAL |        | 1260638 |    |      | 100     |      |

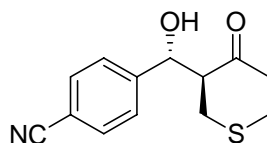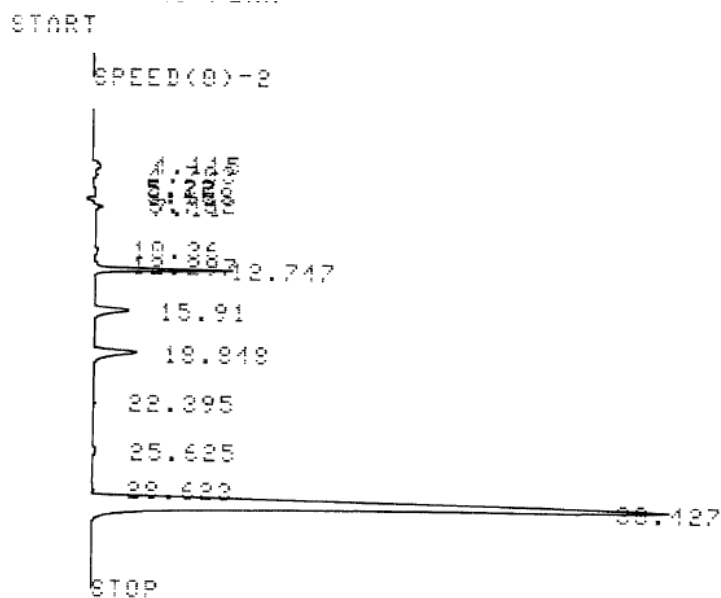

CHROMATOPAC C-R6A  
 SAMPLE NO 0  
 REPORT NO 889

FILE 0  
 METHOD 41

| PKNO  | TIME   | AREA   | MK | IDNO | CONC    | NAME |
|-------|--------|--------|----|------|---------|------|
| 1     | 12.747 | 69792  | V  |      | 7.1226  |      |
| 2     | 15.91  | 26104  |    |      | 2.664   |      |
| 3     | 18.848 | 41224  |    |      | 4.207   |      |
| 4     | 38.427 | 942749 | V  |      | 96.0063 |      |
| TOTAL |        | 979869 |    |      | 100     |      |



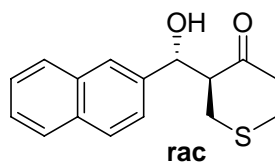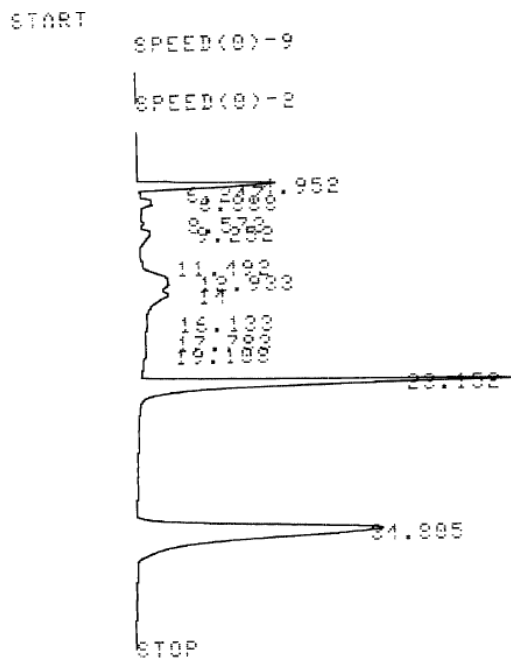

CHROMATOPAC C-R6A  
 SAMPLE NO 0  
 REPORT NO 10

FILE 0  
 METHOD 41

| PKNO  | TIME   | AREA    | MK | IDNO | CONC    | NAME |
|-------|--------|---------|----|------|---------|------|
| 1     | 4.952  | 138851  |    |      | 0.2912  |      |
| 2     | 6.888  | 20371   | V  |      | 1.236   |      |
| 3     | 9.252  | 22808   | V  |      | 1.3353  |      |
| 4     | 12.903 | 88328   | V  |      | 5.2379  |      |
| 5     | 14.193 | 68170   | V  |      | 4.1362  |      |
| 6     | 16.133 | 19759   | V  |      | 1.1989  |      |
| 7     | 17.783 | 10491   | V  |      | 0.631   |      |
| 8     | 23.152 | 636253  |    |      | 38.6042 |      |
| 9     | 34.805 | 648204  |    |      | 39.3293 |      |
| TOTAL |        | 1648145 |    |      | 100     |      |

START

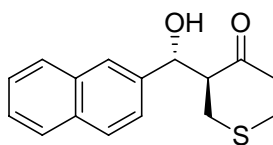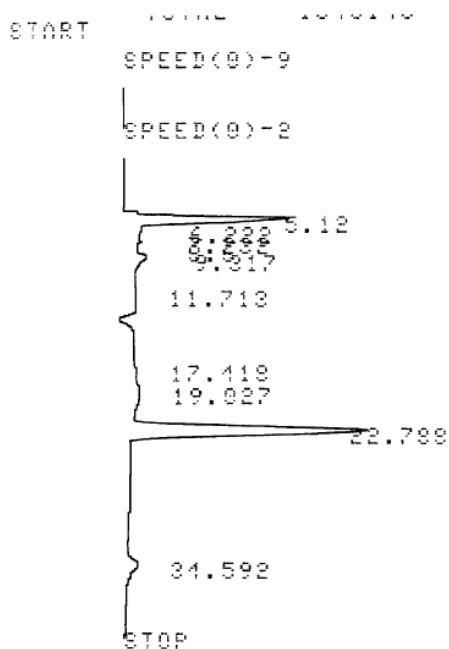

CHROMATOPAC C-REA FILE 0  
 SAMPLE NO 0 METHOD 41  
 REPORT NO 11

| PKNO  | TIME   | AREA   | MK | IDNO | CONC    | NAME |
|-------|--------|--------|----|------|---------|------|
| 1     | 5.12   | 170724 |    |      | 23.7926 |      |
| 2     | 6.222  | 22517  | Y  |      | 3.1367  |      |
| 3     | 7.232  | 19232  | Y  |      | 2.6791  |      |
| 4     | 8.6    | 16307  | Y  |      | 2.2717  |      |
| 5     | 9.317  | 24006  | Y  |      | 3.3442  |      |
| 6     | 19.027 | 17073  |    |      | 2.3784  |      |
| 7     | 22.789 | 418612 |    |      | 58.3146 |      |
| 8     | 34.592 | 29390  |    |      | 4.0928  |      |
| TOTAL |        | 717851 |    |      | 100     |      |

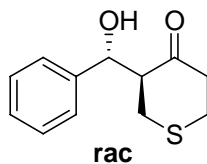

START

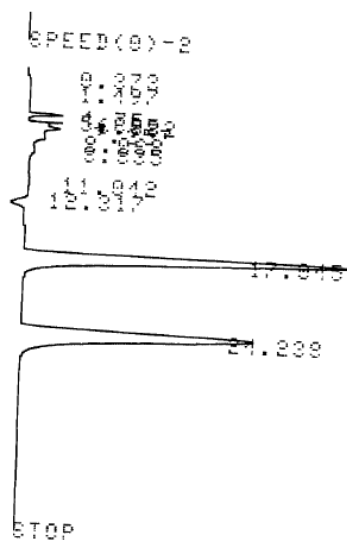

CHROMATOPAC C-R6A  
 SAMPLE NO 0  
 REPORT NO 16

FILE 0  
 METHOD 41

| PKNO  | TIME   | AREA    | MK | IDNO | CONC    | NAME |
|-------|--------|---------|----|------|---------|------|
| 1     | 4.75   | 27791   |    |      |         |      |
| 2     | 6.582  | 25094   | V  |      | 2.6127  |      |
| 3     | 7.357  | 44726   | V  |      | 2.36    |      |
| 4     | 8.068  | 36160   | V  |      | 4.2065  |      |
| 5     | 8.835  | 37447   | V  |      | 3.4008  |      |
| 6     | 11.042 | 57559   | V  |      | 3.5219  |      |
| 7     | 12.317 | 13982   | V  |      | 5.4134  |      |
| 8     | 17.045 | 413618  |    |      | 1.2074  |      |
| 9     | 24.238 | 406978  |    |      | 38.9084 |      |
| TOTAL |        | 1060273 |    |      | 100     |      |

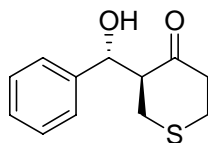

WARNING NO PEAK  
 START

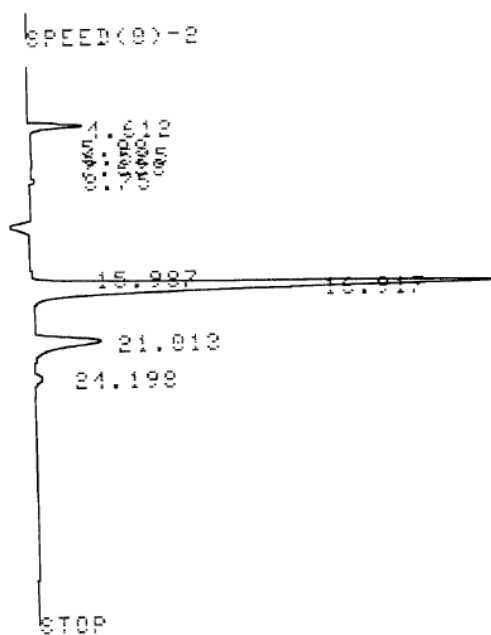

CHROMATOPAC C-R6A  
 SAMPLE NO 0  
 REPORT NO 14

FILE 0  
 METHOD 41

| PKNO  | TIME   | AREA   | MK | IDNO | CONC    | NAME |
|-------|--------|--------|----|------|---------|------|
| 1     | 4.612  | 36660  |    |      | 5.2517  |      |
| 2     | 16.917 | 540491 | V  |      | 77.427  |      |
| 3     | 21.013 | 105291 |    |      | 15.0032 |      |
| 4     | 24.198 | 15623  |    |      | 2.208   |      |
| TOTAL |        | 698066 |    |      | 100     |      |

T: 16.9 min and 24.1 min

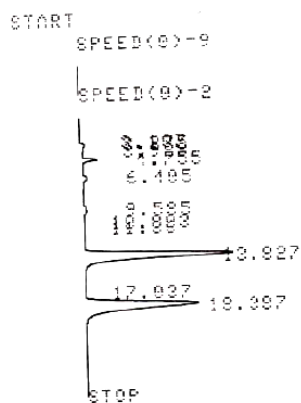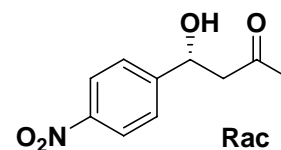

CHROMATOPAC C-R6A FILE 0  
 SAMPLE NO 0 METHOD 41  
 REPORT NO 393

| PKNO  | TIME   | AREA   | MK | IDNO | CONC    | NAME |
|-------|--------|--------|----|------|---------|------|
| 1     | 13.827 | 446044 |    |      | 56.0505 |      |
| 2     | 19.387 | 445143 | Y  |      | 49.9495 |      |
| TOTAL |        | 891187 |    |      | 100     |      |

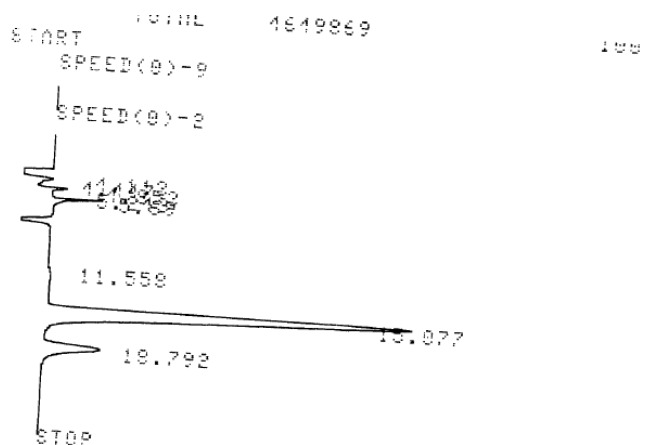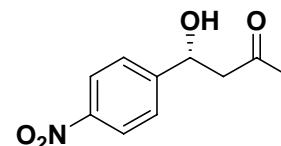

CHROMATOPAC C-R6A FILE 0  
 SAMPLE NO 0 METHOD 41  
 REPORT NO 600

| PKNO  | TIME   | AREA   | MK | IDNO | CONC    | NAME |
|-------|--------|--------|----|------|---------|------|
| 1     | 1.110  | 45574  |    |      |         |      |
| 2     | 1.447  | 10423  | Y  |      | 5.4328  |      |
| 3     | 1.853  | 35568  | Y  |      | 1.4809  |      |
| 4     | 5.243  | 16825  | Y  |      | 1.24    |      |
| 5     | 5.69   | 36438  | Y  |      | 2.0056  |      |
| 6     | 15.077 | 590488 |    |      | 1.3407  |      |
| 7     | 18.792 | 101555 |    |      | 70.3908 |      |
| TOTAL |        | 838871 |    |      | 12.1061 |      |
|       |        |        |    |      | 100     |      |

- (1) X. Xu, Z. Tang, Y. Wang, S. Luo, L. Cun, and L. Gong, *J. Org. Chem.* 2007, **72**, 9905.
- (2) Z. Tang, Z. Yang, X. Chen, L. Cun, A. Mi and L. Gong, *J. Am. Chem. Soc.* 2005, **127**, 9285.
- (3) N. Mase, Y. Nakai, N. Ohara, H. Yoda, K. Takabe, F. Tanaka and C. F. Barbas III, *J. Am. Chem. Soc.* 2006, **128**, 734.
- (4) J. Chen, X. Li, X. Xing, W. Xiao, *J. Org. Chem.* 2006, **71**, 8198.
- (5) H. Yang and R. G. Carter, *Org. Lett.* 2008, **10**, 4649.
- (6) Y. Wu, Y. Zhang, M. Yu, G. Zhao and S. Wang, *Org. Lett.* 2006, **8**, 4417.
- (7) D. E. Ward and V. Jheengut, *Tetrahedron Lett.*, 2004, **45**, 8347.
